# Supplementary material for: Mechanistic dichotomy in the solvent dependent access to E vs. Z-allylic amines via decarboxylative vinylation of amino acids
Source: Royal Society of Chemistry journal article supplement (doi:10.1039/d2sc02090d), 2022-01-01
Supplement: d2sc02090d1.pdf [file d2sc02090d1.pdf]

## Solvent Dependent Access to *E* vs *Z*-allylic amines via Decarboxylative Vinylolation of Amino Acids

Samir Manna<sup>a</sup>, Shunta Kakumachi<sup>b,c</sup>, Kanak Kanti Das<sup>a</sup>, Youichi Tsuchiya<sup>c\*</sup>, Chihaya Adachi<sup>b,c</sup>, Santanu Panda<sup>a\*</sup>

Supporting information

Table of Contents

|                                                                                                              |           |
|--------------------------------------------------------------------------------------------------------------|-----------|
| General Information                                                                                          | S1        |
| Experimental Set-up                                                                                          | S2        |
| General procedure for the decarboxylative ( <i>E</i> ), <i>Z</i> -vinylolation of N-Boc $\alpha$ amino acids | S3        |
| Optimization table for decarboxylative <i>Z</i> -vinylolation                                                | S4        |
| Optimization table for homoallylic amines                                                                    | S5        |
| <sup>1</sup> H-NMR & <sup>13</sup> C-NMR data for synthesized compounds                                      | S5-S19    |
| Photostationary state studies, Stern Volmer Plot and fluorescence quenching studies                          | S21 – S24 |
| <sup>1</sup> H-NMR & <sup>13</sup> C-NMR Spectra                                                             | S22-S71   |

General Information: Unless otherwise stated, reactions were performed under nitrogen using freshly purified solvents. All reactions were monitored by thin-layer chromatography with E. Merck silica gel 60 F254 pre-coated plates (0.25 mm). Flash chromatography was performed with indicated solvents using silica gel. <sup>1</sup>H and <sup>13</sup>C NMR spectra were recorded with a Bruker 400, 500 MHz NMR instrument. Data for <sup>1</sup>H NMR are reported as follows: chemical shift (ppm), integration, multiplicity (s = singlet, d = doublet, t = triplet, q = quartet, p = pentet, dd = doublet of doublets, ddd = doublet of doublets of doublets and m = multiplet), and coupling constant (Hz). Mass spectra were acquired on an Agilent technologies 1200 series LC/MS using indicated ionization methods. The known compounds were characterized by <sup>1</sup>H NMR and <sup>13</sup>C NMR. For all the known compounds copy of <sup>1</sup>H-NMR, <sup>13</sup>C NMR and the appropriate references are given.

Materials: Chemicals were purchased from Aldrich, Alfa Aesar, Spectrochem, Avra, TCI and used without purification unless otherwise noted.

## 1. Experimental Set-up

Photo catalytic reactions were set up in a light bath which is described below. Blue LEDs (12W×2; model 12062, Empire LED company, India) were set up on the table lamp stand, which is fixed on a Cardboard Rectangle Corrugated Paper Box and then wrapped with aluminium foil. The reaction was set-up top of a magnetic stirrer. A lid which rest on the top was fashioned from cardboard and holes were made such that reaction tubes (18 x 150 mm, 27 ml borosilicate tube) were held firmly in the cardboard lid which was placed on the top of bath. To maintained the 50 °C (for *E*-isomer), we have used sand bath, which was connected with a temperature sensor and a thermometer to measure the accurate temperature. In case of *Z*-isomer, reactions were performed at room temperature.

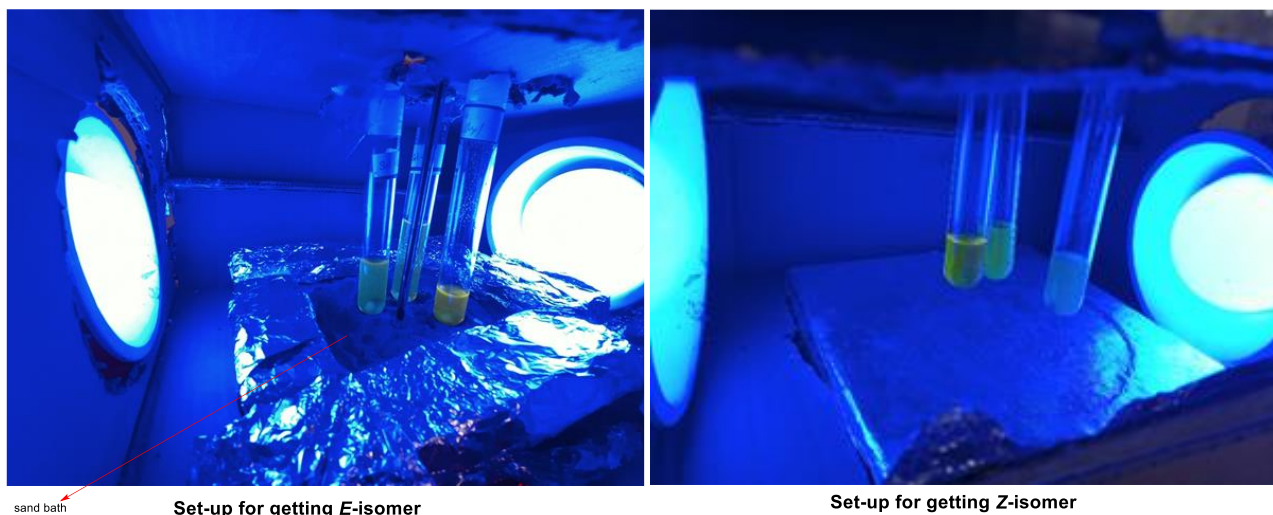

### 1. Decarboxylative Vinylation Procedure:

#### General procedure (A) for the decarboxylative (*E*) vinylation of *N*-Boc $\alpha$ amino acids:

To a dry 20 mL vial equipped with a stir bar was added 4CzIPN (2.3 mg, 0.003 mol, 0.01 equiv.), the vinyl sulfone (0.30 mmol, 1.0 equiv.), Cs<sub>2</sub>CO<sub>3</sub> (195mg, 0.60 mmol, 2 equiv.) and the *N*-Boc- $\alpha$ -amino acid (0.60 mmol, 2 equiv.). The vial was sealed and then DMA (5 ml) was added to the vial and the resulting mixture degassed by freeze-pump-thaw under nitrogen (three times). The vial was then placed in a photoreactor which was pre-set to 50 °C, and irradiated with 2 x Blue LED bulbs until complete consumption of the vinyl sulfone, as determined by TLC analysis (48–64h). The reaction mixture was diluted with H<sub>2</sub>O and workup by using EtOAc and the organic residue concentrated *in vacuo*. Purification by flash column chromatography or preparative TLC afforded the (*E*)-vinylation product.

#### General procedure (B) for the decarboxylative (*Z*) vinylation of *N*-Boc $\alpha$ amino acids:

To a dry 20 mL vial equipped with a stir bar was added 4CzIPN (2.3 mg, 0.003 mol, 0.01 equiv.), the vinyl sulfone (0.30 mmol, 1.0 equiv.), Cs<sub>2</sub>CO<sub>3</sub> (195mg, 0.60 mmol, 2 equiv.) and the *N*-Boc- $\alpha$ -amino acid (0.60 mmol, 2 equiv.). The vial was sealed and then 1,4-dioxane (4 ml) was added to the vial and the resulting mixture degassed by freeze-pump-thaw under nitrogen (three times). Then, the vial was placed in a photo reactor and irradiated with 2 x Blue LED bulbs for 48h. After the complete consumption, the reaction mixture was diluted with H<sub>2</sub>O and workup by using EtOAc and the organic

residue concentrated *in vacuo*. Purification by flash column chromatography or preparative TLC afforded the (*Z*)-vinylation product.

General procedure (C) for the decarboxylative allylation of *N*-Boc  $\alpha$  amino acids:

To a dry 20 mL vial equipped with a stir bar was added 4CzIPN (1 mol%), the allylic sulfone (0.23mmol, 1 equiv), Cs<sub>2</sub>CO<sub>3</sub> (0.46 mmol, 2 equiv.) and the *N*-Boc- $\alpha$ -amino acid (2 equiv.). The vial was sealed and then DMF (0.05M) was added to the vial and the resulting mixture degassed by freeze-pump-thaw under nitrogen (three times). The vial was then placed in photoreactor and irradiated with 2 x Blue LED. The reaction mixture was diluted with H<sub>2</sub>O and workup by using EtOAc and the organic residue concentrated *in vacuo*. Purification by flash column chromatography or preparative TLC afforded the vinylation product. (for 1° amino acid, 4 equiv of amino acid as well as 4 equiv of base are used).

**Table 2. Optimization Table for Z-selective vinylation**

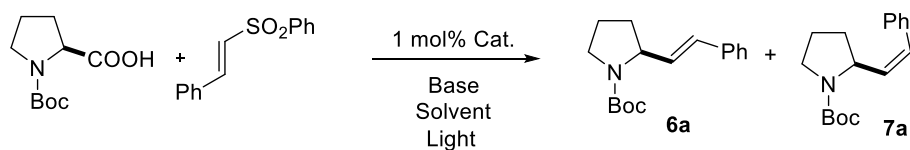

| Entry           | Solvent                       | Catalyst | Base                                | Light            | dr (Z/E)<br>Yield (%) <sup>b</sup> |
|-----------------|-------------------------------|----------|-------------------------------------|------------------|------------------------------------|
| 1               | Toluene                       | 1        | Cs <sub>2</sub> CO <sub>3</sub>     | Blue             | 20:80 (20)                         |
| 2               | Toluene                       | 1        | Cs <sub>2</sub> CO <sub>3</sub>     | CFL <sup>c</sup> | 33:67 (30)                         |
| 3               | Toluene                       | 1        | CsOAc                               | Blue             | 30:70 (20)                         |
| 4               | Toluene                       | 1        | K <sub>2</sub> HPO <sub>4</sub>     | Blue             | 20:80 (15)                         |
| 5               | Toluene                       | 1        | NaOAc                               | Blue             | 0                                  |
| 6               | Toluene                       | 1        | KOAc                                | Blue             | 65:35 (32)                         |
| 7               | Toluene                       | 1        | Na <sub>2</sub> CO <sub>3</sub>     | Blue             | 30:70 (35)                         |
| 8               | Toluene                       | 1        | K <sub>2</sub> CO <sub>3</sub>      | Blue             | 35:65 (20)                         |
| 9               | Toluene                       | 1        | DBU                                 | Blue             | 55:45 (45)                         |
| 10              | Toluene                       | 1        | DABCO                               | Blue             | 0                                  |
| 11              | Toluene                       | 1        | NaHCO <sub>3</sub>                  | Blue             | 0                                  |
| 12              | Toluene                       | 1        | K <sub>3</sub> PO <sub>4</sub>      | Blue             | 0                                  |
| 13              | Toluene                       | 1        | (NH <sub>4</sub> )HCO <sub>3</sub>  | Blue             | 0                                  |
| 14              | Toluene                       | 2        | K <sub>2</sub> HPO <sub>4</sub>     | Blue             | 0                                  |
| 15              | Toluene                       | 2        | Cs <sub>2</sub> CO <sub>3</sub>     | Blue             | 0                                  |
| 16              | Toluene                       | 3        | Cs <sub>2</sub> CO <sub>3</sub>     | Blue             | 0                                  |
| 17              | Toluene                       | 1        | DIPEA                               | Blue             | 0                                  |
| 18              | Toluene : Chlorobenzene (1:1) | 1        | Cs <sub>2</sub> CO <sub>3</sub>     | Blue             | 0                                  |
| 19              | Hexane:ACN (2:1)              | 1        | Cs <sub>2</sub> CO <sub>3</sub>     | Blue             | 0                                  |
| 20              | Toluene:DMF (4:1)             | 1        | Cs <sub>2</sub> CO <sub>3</sub>     | Blue             | 82:18 (50)                         |
| 21              | Toluene:DMF (9:1)             | 1        | Cs <sub>2</sub> CO <sub>3</sub>     | Blue             | 50:50 (40)                         |
| 22              | Ethyl acetate                 | 1        | Cs <sub>2</sub> CO <sub>3</sub>     | Blue             | 53:47 (85)                         |
| 23              | Benzene                       | 1        | Cs <sub>2</sub> CO <sub>3</sub>     | Blue             | 40:60 (20)                         |
| 24 <sup>c</sup> | Ethyl acetate/Benzene         | 1        | Cs <sub>2</sub> CO <sub>3</sub>     | Blue             | 10:90 (60)                         |
| 25              | DMSO                          | 1        | Cs <sub>2</sub> CO <sub>3</sub>     | Blue             | 45:55 (70)                         |
| 26              | <b>1,4-dioxane</b>            | <b>1</b> | <b>Cs<sub>2</sub>CO<sub>3</sub></b> | <b>Blue</b>      | <b>08:92 (79)</b>                  |

<sup>a</sup>vinyl sulphone (1 equiv.), Boc-amino acid (2 equiv.), Cs<sub>2</sub>CO<sub>3</sub> (2 equiv.) at RT, isolated Yield, solvent (2 ml), <sup>c</sup> single CFL bulb (PHILIPS, Tornado G 6E, 32W, 32 W cool daylight lamp (2150 lm, 67 Lm/W)); <sup>d</sup> Ethyl acetate switch to benzene (We choose ethyl acetate for the formation of E-isomer majorly and then removed the solvent by rotavap and benzene was added for the isomerization step)

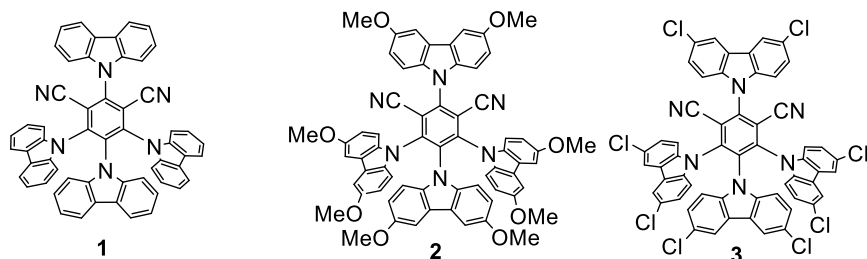

## 2. Optimization Table of decarboxylative allylation of *N*-Boc $\alpha$ amino acids:

Table 2. Optimization Table of homoallylic amine

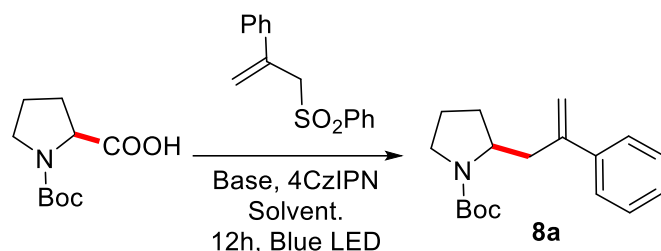

| Entry | Solvent            | Base                            | Yield) |
|-------|--------------------|---------------------------------|--------|
| 1     | Toluene            | Cs <sub>2</sub> CO <sub>3</sub> | 25     |
| 2     | CH <sub>3</sub> CN | Cs <sub>2</sub> CO <sub>3</sub> | 15     |
| 3     | MeOH               | Cs <sub>2</sub> CO <sub>3</sub> | NA     |
| 4     | DMF                | Cs <sub>2</sub> CO <sub>3</sub> | 63     |
| 5     | DMA                | Cs <sub>2</sub> CO <sub>3</sub> | 58     |
| 6     | DMF                | Na <sub>2</sub> CO <sub>3</sub> | 42     |
| 7     | DMF                | KOAc                            | 31     |
| 8     | DMF                | K <sub>2</sub> HPO <sub>4</sub> | 10     |
| 9     | DMF                | CsOAc                           | 8      |
| 10    | DMF                | DBU                             | 36     |

Boc-amino acid (2 equiv.), allylic sulfone (1 equiv.), Base (2 equiv.), RT, solvent (2 ml).

## 3. Experimental Data for Decarboxylative (*E*) Vinylation Products:

### (*E*)-*tert*-butyl 2-styrylpyrrolidine-1-carboxylate (**6a**)<sup>1,i</sup>

Prepared following the general procedure A, using (*E*)-(2-(phenylsulfonyl)vinyl)benzene (73 mg, 0.30 mmol, 1 equiv.), Boc-Pro-OH (129 mg, 0.60 mmol, 2 equiv.), 4CzIPN (2.3 mg, 0.003 mmol, 0.01 equiv.), Cs<sub>2</sub>CO<sub>3</sub> (195 mg, 0.60 mmol, 2 equiv.) and DMA (5.0 mL). After 48 h, the reaction mixture was subjected to the workup protocol outlined in the general procedure A. Purification by preparative TLC using 9:1 hexane:EtOAc provided the title compound (61 mg, 75%, 100:0 *E*:*Z*) as a colorless solid. <sup>1</sup>H NMR (400 MHz, CDCl<sub>3</sub>)  $\delta$  7.36-7.26 (m, 4H), 7.23-7.21 (m, 1H), 6.40 (d, *J* = 15.6 Hz, 1H), 6.10 (br. s, 1H), 4.39 (br. s, 1H), 3.46 (s, 2H), 2.09-2.00 (m, 1H), 1.92-1.77 (m, 3H), 1.43 (s, 9H). <sup>13</sup>C NMR (126 MHz, CDCl<sub>3</sub>)  $\delta$  154.77, 137.20, 130.86, 129.53, 128.59, 127.34, 126.38, 79.25, 59.05, 46.38, 32.65, 28.60, 23.20.

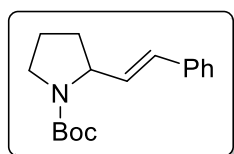

### (*E*)-benzyl 2-styrylpyrrolidine-1-carboxylate (**6b**)<sup>1,i</sup>

Prepared following the general procedure A, using (*E*)-(2-(phenylsulfonyl)vinyl)benzene (73 mg, 0.30 mmol, 1.00 equiv.), Cbz-Pro-OH (149 mg, 0.60 mmol, 2 equiv.), 4CzIPN (2.3 mg, 0.003 mmol, 0.01 equiv.), Cs<sub>2</sub>CO<sub>3</sub> (195 mg, 0.60 mmol, 2.00 equiv.) and ACN (5.0 mL) instead of DMA. After 48 h, the reaction solvent was evaporated in reduce pressure. The crude mixture was diluted using DCM and purification was done by preparative TLC using 9:1 hexane:EtOAc

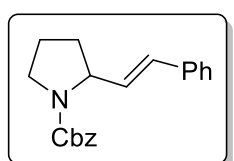

provided the title compound (87 mg, 95%, 98:02 *E:Z*) as a colorless liquid. <sup>1</sup>H NMR (400 MHz, CDCl<sub>3</sub>) δ 7.35-7.23 (m, 10H), 6.36 (rotamer A, 0.6H, d, *J* = 15.6 Hz), 6.48 (rotamer B, 0.4H, d, *J* = 15.2 Hz), 6.12 (br. s, 1H), 5.21-5.05 (br. m, 2H), 4.60-4.53 (m, 1H), 3.54 (br. s, 2H), 2.10-2.00 (m, 1H), 1.93-1.81 (m, 3H). <sup>13</sup>C NMR (126 MHz, CDCl<sub>3</sub>) δ 155.14, 136.86, 130.25, 129.89, 128.48, 128.38, 127.86, 127.40, 126.43, 66.74, 58.96, 46.84, 46.46, 32.65, 31.67, 23.73, 23.00.

**(*E*)-*tert*-butyl cinnamylcarbamate(6c)<sup>2</sup>:**

Prepared following the general procedure A, using (*E*)-(2-(phenylsulfonyl)vinyl)benzene (73 mg, 0.30 mmol, 1.00 equiv.), Boc-Gly-OH (105 mg, 0.60 mmol, 2 equiv.), 4CzIPN (2.3 mg, 0.003 mmol, 0.01 equiv.), Cs<sub>2</sub>CO<sub>3</sub> (195 mg, 0.60 mmol, 2.00 equiv.) and DMA (5.0 mL). After 50 h, the reaction mixture was subjected to the workup protocol outlined in the general procedure A. Purification by preparative TLC using 16:1 hexane:EtOAc provided the title compound (62 mg, 89%, 97:03 *E:Z*) as a white solid. <sup>1</sup>H NMR (400 MHz, CDCl<sub>3</sub>) δ 7.37-7.29 (m, 4H), 7.25-7.23 (m, 1H), 6.51 (d, *J* = 16 Hz, 1H), 6.19 (dt, *J* = 15.8, 6.1 Hz, 1H), 4.65 (br. s, 1H), 3.91 (s, 2H), 1.45 (s, 9H). <sup>13</sup>C NMR (126 MHz, CDCl<sub>3</sub>) 155.78, 136.74, 131.51, 128.77, 128.58, 127.61, 126.38, 79.51, 42.76, 28.44.

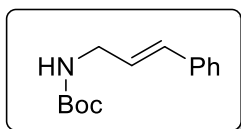

**(*E*)-*tert*-butyl 4-phenylbut-3-en-2-ylcarbamate (6d)<sup>3</sup>:**

Prepared following the general procedure A, using (*E*)-(2-(phenylsulfonyl)vinyl)benzene (73 mg, 0.30 mmol, 1.00 equiv.), Boc-Ala-OH (113 mg, 0.60 mmol, 2 equiv.), 4CzIPN (2.3 mg, 0.003 mmol, 0.01 equiv.), Cs<sub>2</sub>CO<sub>3</sub> (195 mg, 0.60 mmol, 2 equiv.) and DMA (5.0 mL). After 52 h, the reaction mixture was subjected to the workup protocol outlined in the general procedure A. Purification by preparative TLC using 16:1 hexane:EtOAc provided the title compound (55 mg, 75%, 100:0 *E:Z*) as a colorless liquid. <sup>1</sup>H NMR (400 MHz, CDCl<sub>3</sub>) δ 7.37-7.26 (m, 4H), 7.24-7.20 (m, 1H), 6.49 (d, *J* = 16 Hz, 1H), 6.15 (dd, *J* = 16, 5.2 Hz, 1H), 4.55 (br. s, 1H), 4.39 (br. s, 1H), 1.46 (s, 9H), 1.31 (d, *J* = 6.8 Hz, 1H). <sup>13</sup>C NMR (126 MHz, CDCl<sub>3</sub>) δ 155.14, 136.85, 131.74, 129.84, 129.18, 128.52, 127.47, 126.36, 79.40, 47.92, 28.43, 21.13.

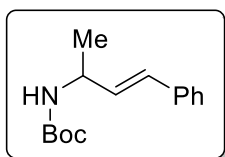

**(*E*)-*tert*-butyl 4-methyl-1-phenylpent-1-en-3-ylcarbamate (6e)<sup>1</sup>:**

Prepared following the general procedure A, using (*E*)-(2-(phenylsulfonyl)vinyl)benzene (73 mg, 0.30 mmol, 1.00 equiv.), Boc-Val-OH (130 mg, 0.60 mmol, 2 equiv.), 4CzIPN (2.3 mg, 0.003 mmol, 0.01 equiv.), Cs<sub>2</sub>CO<sub>3</sub> (195 mg, 0.60 mmol, 2.00 equiv.) and DMA (5.0 mL). After 50 h, the reaction mixture was subjected to the workup protocol outlined in the general procedure A. Purification by preparative TLC using 14:1 hexane:EtOAc provided the title compound (72 mg, 87%, 100:0 *E:Z*) as a colorless liquid. <sup>1</sup>H NMR (400 MHz, CDCl<sub>3</sub>) δ 7.36 (d, *J* = 7.6 Hz, 2H), 7.30 (t, *J* = 7.4 Hz, 2H), 7.22 (t, *J* = 7.2 Hz, 1H), 6.50 (d, *J* = 16 Hz, 1H), 6.00 (dd, *J* = 16, 6.4 Hz, 1H), 4.59 (br. s, 1H), 4.14 (br. s, 1H), 1.86-1.85 (m, 1H), 1.46 (s, 9H), 0.95 (dd, *J* = 4.4 Hz, 6H). <sup>13</sup>C NMR (101 MHz, CDCl<sub>3</sub>) δ 155.50, 137.08, 130.72, 129.12, 128.51, 127.40, 126.36, 79.35, 57.80, 32.83, 28.43, 18.79, 18.31.

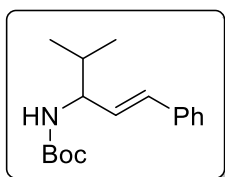

**(*E*)-*tert*-butyl 5-methyl-1-phenylhex-1-en-3-ylcarbamate (6f)<sup>4</sup>:**

Prepared following the general procedure A, using (*E*)-(2-(phenylsulfonyl)vinyl)benzene (73 mg, 0.30 mmol, 1 equiv.), Boc-Leu-OH (138 mg, 0.60 mmol, 2 equiv.), 4CzIPN (2.3 mg, 0.003 mmol, 0.01 equiv.), Cs<sub>2</sub>CO<sub>3</sub> (195 mg, 0.60 mmol, 2 equiv.) and DMA (5.0 ml). After 50 h, the reaction mixture was subjected to the workup protocol outlined in the general

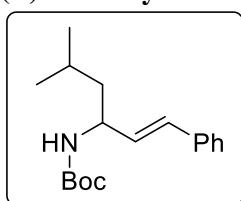

procedure A. Purification by preparative TLC using 14:1 hexane:EtOAc provided the title compound (75 mg, 87%, 92:08 *E:Z*) as a colorless solid. <sup>1</sup>H NMR (400 MHz, CDCl<sub>3</sub>) δ 7.35 (d, *J* = 7.6 Hz, 2H), 7.30 (t, *J* = 7.4 Hz, 2H), 7.22 (t, *J* = 7.4 Hz, 1H), 6.51 (d, *J* = 16 Hz, 1H), 6.00 (dd, *J* = 16, 6.4 Hz, 1H), 4.50 (br. s, 1H), 4.31 (br. s, 1H), 1.73-1.67 (m, 1H), 1.46 (s, 9H), 1.42-1.40 (m, 2H), 0.95 (d, *J* = 6.4 Hz, 6H). <sup>13</sup>C NMR (126 MHz, CDCl<sub>3</sub>) δ 155.29, 137.00, 131.09, 129.76, 128.51, 127.41, 126.37, 79.31, 50.85, 44.88, 28.44, 28.39, 28.02, 25.14, 24.93, 24.80, 22.65, 22.54.

**(*E*)-tert-butyl 4-methyl-1-phenylhex-1-en-3-ylcarbamate (6g):**

Prepared following the general procedure A, using (*E*)-(2-(phenylsulfonyl)vinyl)benzene (73 mg, 0.30 mmol, 1.00 equiv.), Boc-Ile-OH (138 mg, 0.60 mmol, 2 equiv.), 4CzIPN (2.3 mg, 0.003 mmol, 0.01 equiv.), Cs<sub>2</sub>CO<sub>3</sub> (195 mg, 0.60 mmol, 2.00 equiv.) and DMA (5.0 mL). After 50 h, the reaction mixture was subjected to the workup protocol outlined in the general procedure A. Purification by preparative TLC using 14:1 hexane:EtOAc provided the title compound (73 mg, 85%, 96:04 *E:Z*) as a colorless solid. <sup>1</sup>H NMR (400 MHz, CDCl<sub>3</sub>) δ 7.36 (d, *J* = 8 Hz, 2H), 7.30 (t, *J* = 7.4 Hz, 2H), 7.22 (t, *J* = 7.6 Hz, 1H), 6.50 (dd, *J* = 15.6, 5.6 Hz, 1H), 6.07 (dt, *J* = 15.6, 10.4 Hz, 1H), 4.61 (br. s, 1H), 4.27 (br. s, 1H), 1.74-1.62 (m, 1H), 1.46 (s, 9H), 1.26-1.12 (m, 2H), 0.96-0.90 (m, 6H). <sup>13</sup>C NMR (126 MHz, CDCl<sub>3</sub>) δ 155.58, 137.06, 130.85, 130.25, 128.51, 127.40, 127.26, 126.36, 126.34, 79.30, 56.74, 56.22, 39.56, 39.49, 28.44, 25.55, 15.22, 14.68, 11.71, 11.68. HRMS (ESI) *m/z* cal. for (C<sub>18</sub>H<sub>27</sub>NO<sub>2</sub> + Na)<sup>+</sup> 312.1934, found 312.1746.

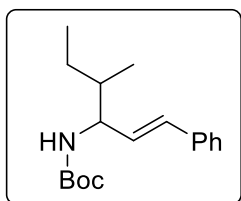

**(*E*)-tert-butyl methyl(4-methyl-1-phenylhex-1-en-3-yl)carbamate (6h):**

Prepared following the general procedure A, using (*E*)-(2-(phenylsulfonyl)vinyl)benzene (73 mg, 0.30 mmol, 1.00 equiv.), N-Boc-N-methyl-Ile-OH (147 mg, 0.60 mmol, 2 equiv.), 4CzIPN (2.3 mg, 0.003 mmol, 0.01 equiv.), Cs<sub>2</sub>CO<sub>3</sub> (195 mg, 0.60 mmol, 2.00 equiv.) and DMA (5.0 mL). After 50 h, the reaction mixture was subjected to the workup protocol outlined in the general procedure A. Purification by preparative TLC using 14:1 hexane:EtOAc provided the title compound (85 mg, 95%, 100:0 *E:Z*) as a colorless solid. <sup>1</sup>H NMR (400 MHz, CDCl<sub>3</sub>) δ 7.36 (t, *J* = 7.2 Hz, 2H), 7.29 (t, *J* = 7.6 Hz, 2H), 7.23 (d, *J* = 7.2 Hz, 1H), 6.51 (br. s, 1H), 6.18 (dd, *J* = 15.9, 8.0 Hz, 1H), 4.42-4.22 (m, 1H), 2.76 (s, 3H), 1.72-1.70 (m, 1H), 1.48 (s, 9H), 1.46-1.05 (m, 2H), 0.93-0.88 (m, 6H). <sup>13</sup>C NMR (126 MHz, CDCl<sub>3</sub>) δ 156.08, 156.01, 137.12, 132.69, 128.54, 127.54, 127.51, 126.35, 79.35, 63.09, 61.96, 35.82, 28.55, 26.30, 25.41, 16.34, 11.01. HRMS (ESI) *m/z* cal. for (C<sub>19</sub>H<sub>29</sub>NO<sub>2</sub> + H)<sup>+</sup> 304.2271, found 304.2270.

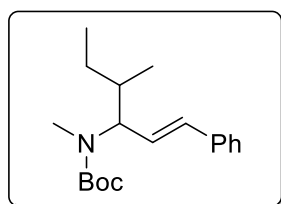

**(*E*)-tert-butyl 1,4-diphenylbut-3-en-2-ylcarbamate (6i)<sup>1</sup>:**

Prepared following the general procedure A, using (*E*)-(2-(phenylsulfonyl)vinyl)benzene (73 mg, 0.30 mmol, 1 equiv.), Boc-Phe-OH (159 mg, 0.60 mmol, 2 equiv.), 4CzIPN (2.3 mg, 0.003 mmol, 0.01 equiv.), Cs<sub>2</sub>CO<sub>3</sub> (195 mg, 0.60 mmol, 2 equiv.) and DMA (5.0 mL). After 50 h, the reaction mixture was subjected to the workup protocol outlined in the general procedure A. Purification by preparative TLC using 14:1 hexane:EtOAc provided the title compound (88 mg, 91%, 97:03 *E:Z*) as a colorless solid. <sup>1</sup>H NMR (400 MHz, CDCl<sub>3</sub>) δ 7.31-7.21 (m, 10H), 6.45 (d, *J* = 15.9 Hz, 1H), 6.14 (dd, *J* = 15.9, 5.0 Hz, 1H), 4.58 (br. s, 2H), 2.93 (s, 2H), 1.42 (s, 9H). <sup>13</sup>C NMR (126 MHz, CDCl<sub>3</sub>) δ 155.27, 137.48, 136.94, 130.32, 129.87, 129.71, 128.63, 128.50, 127.62, 126.63, 126.50, 79.62, 53.43, 42.07, 28.48.

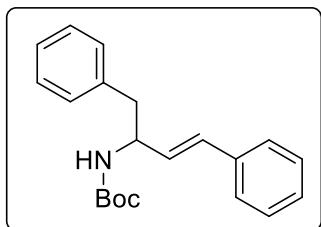

**(E)-benzyl 4-(tert-butoxycarbonyl)-6-phenylhex-5-enoate (6j):**

Prepared following the general procedure A, using (*E*)-(2-(phenylsulfonyl)vinyl)benzene (73 mg, 0.30 mmol, 1 equiv.), Boc-Glu(benzyl ester) -OH (202 mg, 0.60 mmol, 2 equiv.), 4CzIPN (2.3 mg, 0.003 mmol, 0.01 equiv.), Cs<sub>2</sub>CO<sub>3</sub> (195 mg, 0.60 mmol, 2 equiv.) and DMA (5.0 mL). After 50 h, the reaction mixture was subjected to the workup protocol outlined in the general procedure A. Purification by preparative TLC using 14:1 hexane:EtOAc provided the title compound (82 mg, 70%, 100:0 *E:Z*) as a colorless solid. <sup>1</sup>H NMR (400 MHz, CDCl<sub>3</sub>) δ 7.35-7.21 (m, 10H), 6.51 (d, *J* = 15.6 Hz, 1H), 6.00 (dd, *J* = 15.6, 6.4 Hz, 1H), 5.10 (s, 2H), 4.62 (br. s, 1H), 4.29 (br. s, 1H), 2.47 (t, *J* = 8 Hz, 1H), 2.02-1.88 (m, 2H), 1.46 (s, 9H). <sup>13</sup>C NMR (126 MHz, CDCl<sub>3</sub>) δ 173.06, 155.27, 136.58, 135.87, 130.75, 129.56, 128.56, 128.24, 127.66, 126.44, 79.58, 66.43, 52.22, 30.91, 30.38, 28.40. HRMS (ESI) *m/z* cal. for (C<sub>24</sub>H<sub>29</sub>NO<sub>4</sub> + Na)<sup>+</sup> 418.2097, found 418.1662.

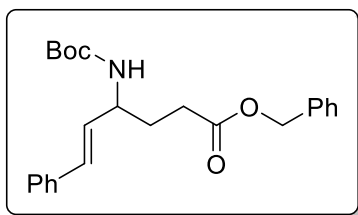**(E)-tert-butyl 5-(methylthio)-1-phenylpent-1-en-3-ylcarbamate (6k)<sup>1</sup>:**

Prepared following the general procedure A, using (*E*)-(2-(phenylsulfonyl)vinyl)benzene (73 mg, 0.30 mmol, 1.00 equiv.), Boc-Met-OH (149 mg, 0.60 mmol, 2 equiv.), 4CzIPN (2.3 mg, 0.003 mmol, 0.01 equiv.), Cs<sub>2</sub>CO<sub>3</sub> (195 mg, 0.60 mmol, 2.00 equiv.) and DMA (5.0 mL). After 50 h, the reaction mixture was subjected to the workup protocol outlined in the general procedure A. Purification by preparative TLC using 14:1 hexane:EtOAc provided the title compound (55 mg, 60%, 97:03 *E:Z*) as a colorless liquid. <sup>1</sup>H NMR (400 MHz, CDCl<sub>3</sub>) δ 7.37-7.29 (m, 4H), 7.23 (t, *J* = 8 Hz, 1H), 6.53 (d, *J* = 16 Hz, 1H), 6.06 (dd, *J* = 16, 6.4 Hz, 1H), 4.64 (br. s, 1H), 4.38 (br. s, 1H), 2.56 (t, *J* = 8 Hz, 2H), 2.12 (s, 3H), 1.89-1.88 (m, 2H), 1.46 (s, 9H). <sup>13</sup>C NMR (126 MHz, CDCl<sub>3</sub>) δ 155.28, 136.67, 130.68, 129.69, 128.58, 127.66, 126.43, 79.61, 52.04, 35.06, 30.58, 28.43, 15.63.

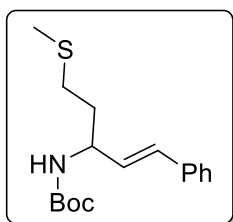**(E)-tert-butyl 7-amino-1-phenylhept-1-en-3-ylcarbamate (6l):**

Prepared following the general procedure A, using (*E*)-(2-(phenylsulfonyl)vinyl)benzene (73 mg, 0.30 mmol, 1.00 equiv.), Boc-Lys-OH (147 mg, 0.60 mmol, 2 equiv.), 4CzIPN (2.3 mg, 0.003 mmol, 0.01 equiv.), Cs<sub>2</sub>CO<sub>3</sub> (195 mg, 0.60 mmol, 2.00 equiv.) and DMA (5.0 mL). After 50 h, the reaction mixture was subjected to the workup protocol outlined in the general procedure A. Purification by preparative TLC using 14:1 hexane:EtOAc provided the title compound (72 mg, 79%, 96:04 *E:Z*) as a colorless liquid. <sup>1</sup>H NMR (400 MHz, CDCl<sub>3</sub>) δ 7.35-7.27 (m, 4H), 7.21 (t, *J* = 7.2 Hz, 1H), 6.48 (d, *J* = 16 Hz, 1H), 6.06 (dd, *J* = 16, 6.4 Hz, 1H), 4.59 (br. s, 1H), 4.24 (br. s, 1H), 3.15 (d, *J* = 5.6 Hz, 2H), 1.45 (s, 9H), 1.42-1.40 (m, 8H). <sup>13</sup>C NMR (126 MHz, CDCl<sub>3</sub>) δ 156.08, 155.43, 136.85, 130.55, 130.11, 128.53, 127.50, 126.40, 79.07, 52.34, 40.30, 35.23, 29.86, 28.45, 23.01. HRMS (ESI) *m/z* cal. for (C<sub>18</sub>H<sub>28</sub>N<sub>2</sub>O<sub>2</sub> + Na)<sup>+</sup> 327.2051, found 327.2074.

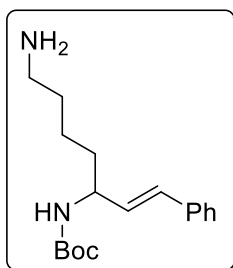**(E)-tert-butyl 2-styrylpiperidine-1-carboxylate (6m)<sup>1</sup>:**

Prepared following the general procedure A, using (*E*)-(2-(phenylsulfonyl)vinyl)benzene (73 mg, 0.30 mmol, 1.00 equiv.), Boc-Pipecolic acid (137 mg, 0.60 mmol, 2 equiv.), 4CzIPN (2.3 mg, 0.003 mmol, 0.01 equiv.), Cs<sub>2</sub>CO<sub>3</sub> (195 mg, 0.60 mmol, 2.00 equiv.) and DMA (5.0 mL). After 50 h, the reaction mixture was subjected to the workup protocol outlined in the general procedure A. Purification by preparative TLC using 14:1 hexane:EtOAc provided the title compound (77 mg, 87%, 90:10

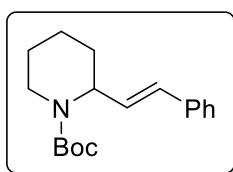



*E:Z*) as a colorless liquid. <sup>1</sup>H NMR (500 MHz, CDCl<sub>3</sub>) δ (*E*-isomer) 7.39-7.32 (m, 4H), 7.28-7.23 (m, 1H), 6.41 (d, *J* = 16 Hz, 1H), 6.20 (dd, *J* = 16, 5 Hz, 1H), 4.99 (br. s, 1H), 4.03 (d, *J* = 14 Hz, 1H), 2.93 (t, *J* = 8 Hz, 1H), 1.87-1.64 (m, 6H), 1.50 (s, 9H). <sup>13</sup>C NMR (126 MHz, CDCl<sub>3</sub>) δ (*E*-isomer) 155.40, 137.11, 130.80, 128.78, 128.54, 127.36, 126.25, 79.44, 52.27, 39.92, 29.53, 28.49, 25.58, 19.71.

**(*E*)-2-styryl-tetrahydrofuran (6n)<sup>5</sup>:**

Prepared following the general procedure A, using (*E*)-(2-(phenylsulfonyl)vinyl)benzene (73 mg, 0.30 mmol, 1.00 equiv.), tetrahydro 2-furoic acid (69 mg, 0.60 mmol, 2 equiv.), 4CzIPN (2.3 mg, 0.003 mmol, 0.01 equiv.), Cs<sub>2</sub>CO<sub>3</sub> (195 mg, 0.60 mmol, 2.00 equiv.) and DMA (5.0 mL). After 50 h, the reaction mixture was subjected to the workup protocol outlined in the general procedure A. Purification by preparative TLC using 14:1 hexane:EtOAc provided the title compound (48 mg, 92%, 96:04 *E:Z*) as a colorless liquid. <sup>1</sup>H NMR (400 MHz, CDCl<sub>3</sub>) δ (*E*-isomer) 7.39-7.29 (m, 4H), 7.25-7.20 (m, 1H), 6.58 (d, *J* = 16 Hz, 1H), 6.21 (ddd, *J* = 15.9, 6.6, 1.1 Hz, 1H), 4.47 (q, *J* = 8 Hz, 1H), 3.96 (q, *J* = 8 Hz, 1H), 3.87-3.81 (m, 1H), 2.15-2.09 (m, 1H), 2.01-1.91 (m, 2H), 1.76-1.67 (m, 1H). <sup>13</sup>C NMR (126 MHz, CDCl<sub>3</sub>) δ (*E*-isomer) 136.92, 130.58, 130.42, 128.49, 127.47, 126.46, 79.64, 68.15, 32.39, 25.90.

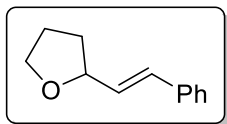

**(*E*)-tert-butyl 1-hydroxy-4-phenylbut-3-en-2-ylcarbamate (6o)<sup>6</sup>:**

Prepared following the general procedure A, using (*E*)-(2-(phenylsulfonyl)vinyl)benzene (73 mg, 0.30 mmol, 1 equiv.), Boc-Ser-OH (123 mg, 0.60 mmol, 2 equiv.), 4CzIPN (2.3 mg, 0.003 mmol, 0.01 equiv.), Cs<sub>2</sub>CO<sub>3</sub> (195 mg, 0.60 mmol, 2 equiv.) and DMA (5.0 mL). After 50 h, the reaction mixture was subjected to the workup protocol outlined in the general procedure A. Purification by preparative TLC using 14:1 hexane:EtOAc provided the title compound (70 mg, 89%, 100:0 *E:Z*) as a colorless liquid. <sup>1</sup>H NMR (400 MHz, CDCl<sub>3</sub>) δ 7.38-7.24 (m, 5H), 6.60 (d, *J* = 16.0 Hz, 1H), 6.15 (dd, *J* = 16.0, 6.1 Hz, 1H), 4.96 (br. s, 1H), 4.42 (br. s, 1H), 3.84-3.69 (m, 2H), 2.24 (br. s, 1H), 1.46 (s, 9H). <sup>13</sup>C NMR (126 MHz, CDCl<sub>3</sub>) δ 155.97, 136.41, 132.04, 128.61, 127.87, 126.65, 126.49, 80.00, 65.70, 54.64, 28.40.

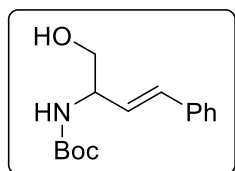

**(*E*)-tert-butyl 1-(1H-indol-3-yl)-4-phenylbut-3-en-2-ylcarbamate (6p)<sup>1</sup>:**

Prepared following the general procedure A, using (*E*)-(2-(phenylsulfonyl)vinyl)benzene (73 mg, 0.30 mmol, 1.00 equiv.), Boc-Trp-OH (182mg, 0.60 mmol, 2 equiv.), 4CzIPN (2.3 mg, 0.003 mmol, 0.01 equiv.), Cs<sub>2</sub>CO<sub>3</sub> (195 mg, 0.60 mmol, 2.00 equiv.) and DMA (5.0 mL). After 50 h, the reaction mixture was subjected to the workup protocol outlined in the general procedure A. Purification by preparative TLC using 14:1 hexane:EtOAc provided the title compound (98mg, 91%, 100:0 *E:Z*) as a colorless liquid. <sup>1</sup>H NMR (400 MHz, CDCl<sub>3</sub>) δ 8.16 (s, 1H), 7.64 (d, *J* = 7.6 Hz, 1H), 7.36 (d, *J* = 8 Hz, 1H), 7.30-7.27 (m, 4H), 7.26-7.19 (m, 2H), 7.13 (t, *J* = 7.4 Hz, 1H), 7.00 (s, 1H), 6.50 (d, *J* = 16 Hz, 1H), 6.19 (dd, *J* = 16, 6.4 Hz, 1H), 4.70 (br. s, 2H), 3.10 (br. s, 2H), 1.43 (s, 9H). <sup>13</sup>C NMR (126 MHz, CDCl<sub>3</sub>) δ 155.40, 136.95, 136.26, 129.90, 128.50, 127.41, 126.42, 122.88, 122.11, 122.06, 119.52, 119.14, 111.45, 111.12, 79.47, 52.78, 31.45, 28.41.

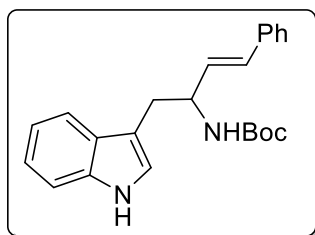

**(*E*)-tert-butyl 1-(4-methoxyphenyl)-4-methylpent-1-en-3-ylcarbamate (6q):**

Prepared following the general procedure A, using (*E*)-1-(2-Benzenesulfonyl-vinyl)-4-methoxy-

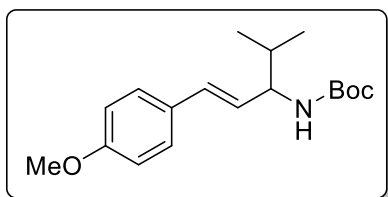

benzene (82 mg, 0.30 mmol, 1 equiv.), Boc-Val-OH (130 mg, 0.60 mmol, 2 equiv.), 4CzIPN (2.3 mg, 0.003 mmol, 0.01 equiv.), Cs<sub>2</sub>CO<sub>3</sub> (195 mg, 0.60 mmol, 2 equiv.) and DMA (5.0 mL). After 50 h, the reaction mixture was subjected to the workup protocol outlined in the general procedure A. Purification by preparative TLC using 14:1 hexane:EtOAc provided the title compound (64 mg, 70%, 100:0 *E:Z*) as a colorless liquid. <sup>1</sup>H NMR (400 MHz, CDCl<sub>3</sub>) δ 7.29 (t, *J* = 8.4 Hz, 2H), 6.84 (d, *J* = 8.4 Hz, 2H), 6.46 (d, *J* = 16 Hz, 1H), 5.93 (dd, *J* = 16, 6.4 Hz 1H), 4.58 (br. s, 1H), 4.09 (br. s, 1H), 3.80 (s, 3H), 1.84-1.80 (m, 1H), 1.45 (s, 9H), 0.95-0.92 (q, *J* = 4 Hz, 6H). <sup>13</sup>C NMR (126 MHz, CDCl<sub>3</sub>) δ 159.14, 139.53, 130.21, 129.85, 127.49, 125.81, 123.39, 120.31, 119.43, 113.97, 110.46, 79.30, 58.10, 55.29, 32.88, 28.44, 18.76, 18.33. HRMS (ESI) *m/z* cal. for (C<sub>18</sub>H<sub>27</sub>NO<sub>3</sub> + H)<sup>+</sup> 306.1991, found 306.2061.

**(*E*)-*tert*-butyl 1-(3-methoxyphenyl)-4-methylpent-1-en-3-ylcarbamate (6r):**

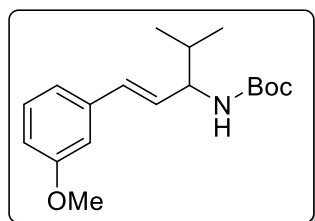

Prepared following the general procedure A, using (*E*)-1-(2-Benzenesulfonyl-vinyl)-3-methoxy-benzene (82 mg, 0.30 mmol, 1 equiv.), Boc-Val-OH (130 mg, 0.60 mmol, 2 equiv.), 4CzIPN (2.3 mg, 0.003 mmol, 0.01 equiv.), Cs<sub>2</sub>CO<sub>3</sub> (195 mg, 0.60 mmol, 2 equiv.) and DMA (5.0 mL). After 50 h, the reaction mixture was subjected to the workup protocol outlined in the general procedure A. Purification by preparative TLC using 14:1 hexane:EtOAc provided the title compound (82 mg, 90%, 100:0 *E:Z*) as a colorless liquid. <sup>1</sup>H NMR (400 MHz, CDCl<sub>3</sub>) δ 7.21 (q, *J* = 8 Hz, 1H), 6.96 (d, *J* = 7.6 Hz, 1H), 6.90-6.89 (m, 1H), 6.77 (dd, *J* = 8, 2.4 Hz, 1H), 6.46 (d, *J* = 15.6 Hz, 1H), 6.00 (q, *J* = 16, 6.4 Hz, 1H), 4.61 (br. s, 1H), 4.13 (br. s, 1H), 3.81 (s, 3H), 1.88-1.83 (m, 1H), 1.46 (s, 9H), 0.96-0.93 (q, *J* = 4.4 Hz, 6H). <sup>13</sup>C NMR (126 MHz, CDCl<sub>3</sub>) δ 159.79, 155.52, 138.48, 130.59, 129.48, 119.01, 112.99, 111.80, 79.32, 57.59, 55.22, 32.81, 28.43, 18.82, 18.30. HRMS (ESI) *m/z* cal. for (C<sub>18</sub>H<sub>27</sub>NO<sub>3</sub> + H)<sup>+</sup> 306.1991, found 306.2070.

**(*E*)-*tert*-butyl 1-(2-methoxyphenyl)-4-methylpent-1-en-3-ylcarbamate (6s):**

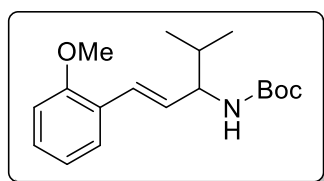

Prepared following the general procedure A, using (*E*)-1-(2-Benzenesulfonyl-vinyl)-2-methoxy-benzene (82 mg, 0.30 mmol, 1 equiv.), Boc-Val-OH (130 mg, 0.60 mmol, 2 equiv.), 4CzIPN (2.3 mg, 0.003 mmol, 0.01 equiv.), Cs<sub>2</sub>CO<sub>3</sub> (195 mg, 0.60 mmol, 2 equiv.) and DMA (5.0 mL). After 50 h, the reaction mixture was subjected to the workup protocol outlined in the general procedure A. Purification by preparative TLC using 14:1 hexane:EtOAc provided the title compound (84 mg, 92%, 96:04 *E:Z*) as a colorless liquid. <sup>1</sup>H NMR (400 MHz, CDCl<sub>3</sub>) δ 7.40 (br. s, 1H), 7.19 (br. s, 1H), 6.90-6.70 (m, 3H), 6.08 (br. s, 1H), 4.63 (br. s, 1H), 4.14 (br. s, 1H), 3.84 (s, 3H), 1.86-1.84 (m, 1H), 1.46 (s, 9H), 0.94 (br. s, 6H). <sup>13</sup>C NMR (126 MHz, CDCl<sub>3</sub>) δ 156.81, 155.69, 129.67, 128.50, 126.89, 126.26, 125.60, 120.68, 111.06, 79.22, 58.15, 55.54, 32.99, 28.53, 18.88, 18.42. HRMS (ESI) *m/z* cal. for (C<sub>18</sub>H<sub>27</sub>NO<sub>3</sub> + H)<sup>+</sup> 306.1991, found 306.2067.

**(*E*)-*tert*-butyl 4-methyl-1-*p*-tolylpent-1-en-3-ylcarbamate (6t):**

Prepared following the general procedure A, using (*E*)-1-(2-Benzenesulfonyl-vinyl)-4-methyl-benzene (77 mg, 0.30 mmol, 1.00 equiv.), Boc-Val-OH (130 mg, 0.60 mmol, 2 equiv.), 4CzIPN (2.3 mg, 0.003 mmol, 0.01 equiv.), Cs<sub>2</sub>CO<sub>3</sub> (195 mg, 0.60 mmol, 2.00 equiv.) and DMA (5.0 mL). After 50 h, the reaction mixture was subjected to the workup protocol outlined in the general procedure A. Purification by preparative TLC using 14:1 hexane:EtOAc provided the title compound (65 mg, 75%, 100:0 *E*:*Z*)

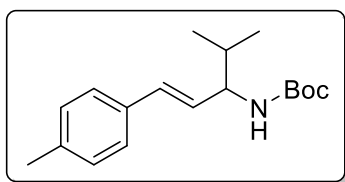

as a colorless liquid. <sup>1</sup>H NMR (400 MHz, CDCl<sub>3</sub>) δ 7.25 (br. s, 2H), 7.10 (br. s, 2H), 6.46 (d, *J* = 16 Hz, 1H), 6.00 (br. s, 1H), 4.58 (br. s, 1H), 4.10 (br. s, 1H), 3.74 (br. s, 1H), 2.32 (s, 3H), 1.85 (br. s, 1H), 1.45 (s, 9H), 0.93 (br. s, 6H). <sup>13</sup>C NMR (126 MHz, CDCl<sub>3</sub>) δ 155.59, 137.32, 134.22, 130.58, 129.20, 128.01, 126.25, 79.28, 57.86, 32.86, 28.43, 21.14, 18.77, 18.31. HRMS (ESI) *m/z* cal. for (C<sub>18</sub>H<sub>27</sub>NO<sub>2</sub> + H)<sup>+</sup> 290.2042, found 290.2113.

#### (*E*)-*tert*-butyl 1-(4-bromophenyl)-4-methylpent-1-en-3-ylcarbamate (**6u**):

Prepared following the general procedure A, using (*E*)-1-(2-Benzenesulfonyl-vinyl)-4-bromo-benzene (97 mg, 0.30 mmol, 1 equiv.), Boc-Val-OH (130 mg, 0.60 mmol, 2 equiv.), 4CzIPN (2.3 mg, 0.003 mmol, 0.01 equiv.), Cs<sub>2</sub>CO<sub>3</sub> (195 mg, 0.60 mmol, 2 equiv.) and DMA (5.0 mL). After 50 h, the reaction mixture was subjected to the workup protocol outlined in the general procedure A. Purification by preparative TLC using 14:1 hexane:EtOAc provided the title compound (84 mg, 80%, 100:0 *E*:*Z*)

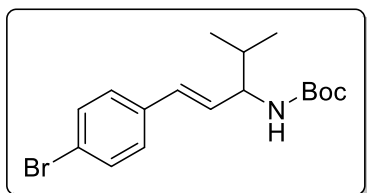

as a colorless liquid. <sup>1</sup>H NMR (400 MHz, CDCl<sub>3</sub>) δ 7.40 (d, *J* = 8 Hz, 2H), 7.25-7.20 (m, 2H), 6.42 (d, *J* = 16 Hz, 1H), 6.04 (dd, *J* = 16, 6.8 Hz, 1H), 4.60 (br. s, 1H), 4.10 (br. s, 1H), 1.85-1.82 (m, 1H), 1.44 (s, 9H), 0.94-0.91 (t, *J* = 4 Hz, 6H). <sup>13</sup>C NMR (126 MHz, CDCl<sub>3</sub>) δ 155.63, 136.08, 131.73, 130.20, 129.67, 128.01, 121.25, 79.54, 57.92, 32.87, 28.54, 18.95, 18.40. HRMS (ESI) *m/z* cal. for (C<sub>17</sub>H<sub>24</sub>BrNO<sub>2</sub> + H)<sup>+</sup> 354.0990, found 354.1074.

#### (*E*)-*tert*-butyl 4-methyl-1-(naphthalen-2-yl)pent-1-en-3-ylcarbamate (**6v**):

Prepared following the general procedure A, using (*E*)-2-(2-Benzenesulfonyl-vinyl)-naphthalene (88 mg, 0.30 mmol, 1 equiv.), Boc-Val-OH (130 mg, 0.60 mmol, 2 equiv.), 4CzIPN (2.3 mg, 0.003 mmol, 0.01 equiv.), Cs<sub>2</sub>CO<sub>3</sub> (195 mg, 0.60 mmol, 2 equiv.) and DMA (5.0 mL). After 50 h, the reaction mixture was subjected to the workup protocol outlined in the general procedure A. Purification by preparative TLC using 14:1 hexane:EtOAc provided the title compound (78 mg, 80%, 75:25

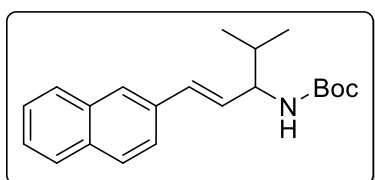

*E*:*Z*) as a colorless liquid. <sup>1</sup>H NMR (400 MHz, CDCl<sub>3</sub>) δ (*E*-isomer) 7.84-7.76 (m, 3H), 7.72 (s, 1H), 7.57 (d, *J* = 8.8 Hz, 1H), 7.47-7.40 (m, 2H), 6.66 (m, 1.25H), 6.21 (dd, *J* = 16, 6.4 Hz, 1H), 4.65 (br. s, 1H), 4.20 (br. s, 1H), 1.92-1.79 (m, 1H), 1.47 (s, 9H), 0.98 (dd, *J* = 6.8, 4.8 Hz, 6H). <sup>13</sup>C NMR (126 MHz, CDCl<sub>3</sub>) δ (*E*-isomer) 155.60, 134.47, 133.64, 132.94, 130.85, 128.11, 127.92, 127.63, 126.22, 126.14, 125.75, 123.66, 79.38, 57.93, 32.89, 28.45, 18.85, 18.34. HRMS (ESI) *m/z* cal. for (C<sub>21</sub>H<sub>27</sub>NO<sub>2</sub> + H)<sup>+</sup> 326.2042, found 326.2163.

#### (*E*)-*tert*-butyl 4-methyl-1-(pyridin-2-yl)pent-1-en-3-ylcarbamate (**6w**):

Prepared following the general procedure A, using (*E*)-2-(2-Benzenesulfonyl-vinyl)-pyridine (73 mg, 0.30 mmol, 1 equiv.), Boc-Val-OH (130 mg, 0.60 mmol, 2 equiv.),

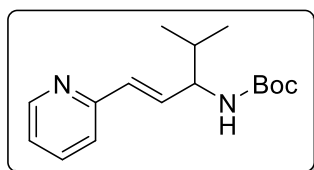

4CzIPN (2.3 mg, 0.003 mmol, 0.01 equiv.), Cs<sub>2</sub>CO<sub>3</sub> (195 mg, 0.60 mmol, 2 equiv.) and DMA (5.0 mL). After 50 h, the reaction mixture was subjected to the workup protocol outlined in the general procedure A. Purification by preparative TLC using 14:1 hexane:EtOAc provided the title compound (78 mg, 95%, 100:0 *E*:*Z*) as a colorless liquid. <sup>1</sup>H NMR (400 MHz, CDCl<sub>3</sub>) δ 8.51 (d, *J* = 4.4 Hz, 2H), 7.22 (d, *J* = 6 Hz, 2H), 6.44 (d, *J* = 16.0 Hz, 1H), 6.32 (dd, *J* = 15.9, 6.1 Hz, 1H), 4.67 (br. s, 1H), 4.16 (br. s, 1H), 1.92-1.84 (m, 1H), 1.45 (s, 9H), 0.96-0.93 (dd, *J* = 6.6, 5.8 Hz, 6H). <sup>13</sup>C NMR (101 MHz, CDCl<sub>3</sub>) δ 155.50, 150.02, 144.38, 134.46, 128.32, 120.96, 79.60, 67.96, 57.65, 32.62, 28.39, 18.90, 18.23. HRMS (ESI) *m/z* cal. for (C<sub>16</sub>H<sub>24</sub>N<sub>2</sub>O<sub>2</sub> + H)<sup>+</sup> 277.1838, found 277.1920.

#### (*E*)-*tert*-butyl 4-methyl-1-(thiophen-2-yl)pent-1-en-3-ylcarbamate (6x):

Prepared following the general procedure A, using (*E*)-2-(2-Benzenesulfonyl-vinyl)-thiophene (75 mg,

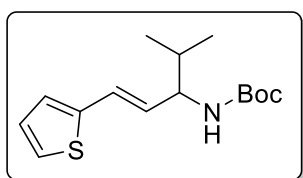

0.30 mmol, 1 equiv.), Boc-Val-OH (130 mg, 0.60 mmol, 2 equiv.), 4CzIPN (2.3 mg, 0.003 mmol, 0.01 equiv.), Cs<sub>2</sub>CO<sub>3</sub> (195 mg, 0.60 mmol, 2 equiv.) and DMA (5.0 mL). After 50 h, the reaction mixture was subjected to the workup protocol outlined in the general procedure A. Purification by preparative TLC using 14:1 hexane:EtOAc provided the title compound (75 mg, 89%, 90:10 *E*:*Z*) as a colorless liquid. <sup>1</sup>H NMR (400 MHz, CDCl<sub>3</sub>) δ (*E*-isomer) 7.32 (s, 1H), 6.36-6.35 (m, 1H), 6.32 (d, *J* = 12.8 Hz, 1H), 6.20 (d, *J* = 2.4 Hz, 1H), 6.04 (dd, *J* = 15.8, 6.5 Hz, 1H), 4.57 (br. s, 1H), 4.11 (br. s, 1H), 1.86-1.82 (m, 1H), 1.45 (s, 9H), 0.94 (t, *J* = 6.7 Hz, 6H). <sup>13</sup>C NMR (101 MHz, CDCl<sub>3</sub>) δ (*E*-isomer) 155.51, 152.59, 141.69, 127.88, 119.20, 111.21, 107.55, 79.31, 57.56, 32.78, 28.41, 18.73, 18.25. HRMS (ESI) *m/z* cal. for (C<sub>15</sub>H<sub>23</sub>NO<sub>2</sub>S + H)<sup>+</sup> 282.1449, found 282.1548.

#### (*E*)-*tert*-butyl 1-(4-methyl-1-phenylpent-1-en-3-ylamino)-1-oxo-3-phenylpropan-2-ylcarbamate (6y):

Prepared following the general procedure A, using (*E*)-1-(2-Benzenesulfonyl-vinyl)-4-methoxy-

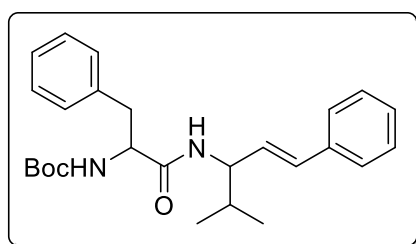

benzene (82 mg, 0.30 mmol, 1.00 equiv.), Boc-Val-OH (130 mg, 0.60 mmol, 2 equiv.), 4CzIPN (2.3 mg, 0.003 mmol, 0.01 equiv.), Cs<sub>2</sub>CO<sub>3</sub> (195 mg, 0.60 mmol, 2.00 equiv.) and DMA (5.0 mL). After 50 h, the reaction mixture was subjected to the workup protocol outlined in the general procedure A. Purification by preparative TLC using 14:1 hexane:EtOAc provided the title compound (64 mg, 70%, 100:0 *E*:*Z*, *dr* 1:1) as a colorless liquid. <sup>1</sup>H NMR (500 MHz, CDCl<sub>3</sub>) δ (*E*-isomer) 7.35-7.22 (m, 10H), 6.42 (d, *J* = 15.9 Hz, 0.53H), 6.31 (d, *J* = 15.5 Hz, 0.37H), 5.99 (dd, *J* = 15.8, 6.7 Hz, 1H), 5.90-5.76 (m, 1H), 5.13 (br. s, 0.43H), 5.04 (br. s, 0.54H), 4.42-4.27 (m, 2H), 3.18-2.97 (m, 3H), 1.82-1.71 (m, 1H), 1.67 (s, 1H), 1.42 (d, *J* = 5.4 Hz, 9H), 0.86 (d, *J* = 6.8 Hz, 3H), 0.79 (d, *J* = 6.7 Hz, 3H). <sup>13</sup>C NMR (126 MHz, CDCl<sub>3</sub>) δ (*E*-isomer) 171.07, 170.50, 170.48, 155.50, 136.83, 131.33, 129.40, 129.31, 128.77, 128.71, 128.50, 128.48, 127.98, 127.53, 126.99, 126.94, 126.42, 126.40, 80.26, 56.42, 52.47, 46.83, 38.62, 38.20, 32.53, 32.45, 28.29, 19.95, 18.75, 18.61, 18.19. HRMS (ESI) *m/z* cal. for (C<sub>26</sub>H<sub>34</sub>N<sub>2</sub>O<sub>3</sub> + Na)<sup>+</sup> 445.2569, found 445.2130.

## 4. Experimental Data for Decarboxylative (*Z*) Vinylation Products:

**(Z)-tert-butyl 2-styrylpyrrolidine-1-carboxylate (7a)<sup>7</sup>:**

Prepared following the general procedure B, using (*E*)-(2-(phenylsulfonyl)vinyl)benzene (73 mg, 0.30 mmol, 1.00 equiv.), Boc-Pro-OH (129 mg, 0.60 mmol, 2 equiv.), 4CzIPN (2.3 mg, 0.003 mmol, 0.01 equiv.), Cs<sub>2</sub>CO<sub>3</sub> (195 mg, 0.60 mmol, 2 equiv.) and 1,4-dioxane (4.0 ml). After 48h, the reaction mixture was subjected to the workup protocol outlined in the general procedure B. Purification by preparative TLC using 9:1 hexane:EtOAc provided the title compound (53 mg, 65%, 08:92 *E:Z*) as a colorless solid. <sup>1</sup>H NMR (400 MHz, CDCl<sub>3</sub>) δ (*Z*-isomer) 7.34-7.25 (m, 5H), 6.41 (d, *J* = 11.6 Hz, 1H), 5.61 (br. s, 1H), 4.73 (br. s, 1H), 3.46 (br. s, 2H), 2.21 (br. s, 1H), 1.95-1.83 (m, 3H), 1.29 (s, 9H). <sup>1</sup>H NMR (400 MHz, CDCl<sub>3</sub>) δ (*E*-isomer) 6.10 (br. s, 1H), 4.40 (br. s, 1H), 3.65 (br. s, 1H), 1.43 (s, 9H); the remaining signals could not be determined. <sup>13</sup>C NMR (101 MHz, CDCl<sub>3</sub>) δ (*Z*-isomer) 154.67, 137.03, 134.96, 128.81, 128.11, 126.74, 79.15, 55.00, 46.56, 33.89, 28.51, 28.48, 23.89.

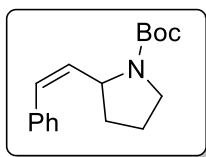

**(Z)-tert-butyl 2-(4-methoxystyryl)pyrrolidine-1-carboxylate (7b)<sup>7</sup>:**

Prepared following the general procedure B, using (*E*)-1-(2-Benzenesulfonyl-vinyl)-4-methoxybenzene (82 mg, 0.30 mmol, 1.00 equiv.), Boc-Pro-OH (129 mg, 0.60 mmol, 2 equiv.), 4CzIPN (2.3 mg, 0.003 mmol, 0.01 equiv.), Cs<sub>2</sub>CO<sub>3</sub> (195 mg, 0.60 mmol, 2 equiv.) and 1,4-dioxane (4.0 ml). After 48h, the reaction mixture was subjected to the workup protocol outlined in the general procedure B. Purification by preparative TLC using 9:1 hexane:EtOAc provided the title compound (70 mg, 77%, 03:97 *E:Z*) as a colorless solid. <sup>1</sup>H NMR (500 MHz, CDCl<sub>3</sub>) δ (*Z*-isomer) 7.27-7.20 (m, 2H), 6.86 (d, *J* = 8.6 Hz, 2H), 6.34 (d, *J* = 11.6 Hz, 1H), 5.95 (br. s, 1H), 5.52 (br. s, 1H), 4.73 (br. s, 1H), 3.81 (s, 3H), 3.45 (br. s, 2H), 2.19 (br. s, 1H), 1.97-1.90 (m, 2H), 1.30 (s, 9H). <sup>13</sup>C NMR (126 MHz, CDCl<sub>3</sub>) δ (*Z*-isomer) 158.43, 133.51, 130.03, 129.72, 127.36, 113.58, 79.11, 55.24, 46.25, 33.73, 28.45, 23.97.

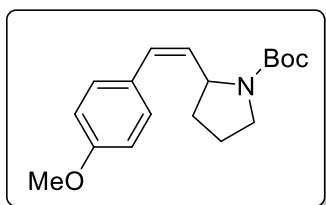

**(Z)-tert-butyl 2-(3-methoxystyryl)pyrrolidine-1-carboxylate (7c):**

Prepared following the general procedure B, using (*E*)-1-(2-Benzenesulfonyl-vinyl)-3-methoxybenzene (82 mg, 0.30 mmol, 1.00 equiv.), Boc-Pro-OH (129 mg, 0.60 mmol, 2 equiv.), 4CzIPN (2.3 mg, 0.003 mmol, 0.01 equiv.), Cs<sub>2</sub>CO<sub>3</sub> (195 mg, 0.60 mmol, 2 equiv.) and 1,4-dioxane (4.0 ml). After 48h, the reaction mixture was subjected to the workup protocol outlined in the general procedure B. Purification by preparative TLC using 9:1 hexane:EtOAc provided the title compound (66 mg, 73%, 01:99 *E:Z*) as a colorless solid. <sup>1</sup>H NMR (400 MHz, CDCl<sub>3</sub>) δ (*Z*-isomer) 7.23 (d, *J* = 7.9 Hz, 1H), 6.79-6.77 (m, 3H), 6.38 (d, *J* = 11.6 Hz, 1H), 5.61 (br. s, 1H), 4.72 (br. s, 1H), 3.81 (s, 3H), 3.45 (br. s, 2H), 2.20-2.18 (m, 1H), 1.92-1.79 (m, 3H), 1.31 (s, 9H). <sup>13</sup>C NMR (126 MHz, CDCl<sub>3</sub>) δ (*Z*-isomer) 159.40, 154.66, 138.41, 135.26, 129.07, 127.80, 121.40, 114.56, 112.14, 79.16, 55.19, 46.55, 33.94, 28.46, 23.96. HRMS (ESI) *m/z* cal. for (C<sub>18</sub>H<sub>27</sub>NO<sub>3</sub> + H)<sup>+</sup> 306.1991, found 306.1893.

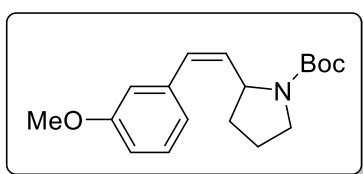

**(Z)-tert-butyl 2-(2-methoxystyryl)pyrrolidine-1-carboxylate (7d):**

Prepared following the general procedure B, using (*E*)-1-(2-Benzenesulfonyl-vinyl)-2-methoxy-

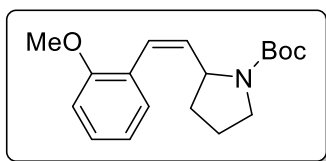

benzene (82 mg, 0.30 mmol, 1.00 equiv.), Boc-Pro-OH (129 mg, 0.60 mmol, 2 equiv.), 4CzIPN (2.3 mg, 0.003 mmol, 0.01 equiv.), Cs<sub>2</sub>CO<sub>3</sub> (195 mg, 0.60 mmol, 2 equiv.) and 1,4-dioxane (4.0 ml). After 48h, the reaction mixture was subjected to the workup protocol outlined in the general procedure B. Purification by preparative TLC using 9:1 hexane:EtOAc provided the title compound (68 mg, 75%, 02:98 *E:Z*) as a colorless solid. <sup>1</sup>H NMR (400 MHz, CDCl<sub>3</sub>) δ (*Z*-isomer) 7.26-7.21 (m, 2H), 6.92 (t, *J* = 7.4 Hz, 1H), 6.84 (d, *J* = 8.3 Hz, 1H), 6.51 (d, *J* = 11.7 Hz, 1H), 5.62 (br. s, 1H), 4.64 (br. s, 1H), 3.80 (s, 3H), 3.44 (br. s, 2H), 2.18 (br. s, 1H), 1.92-1.81 (m, 3H), 1.29 (s, 9H). <sup>13</sup>C NMR (101 MHz, CDCl<sub>3</sub>) δ (*Z*-isomer) 156.99, 154.75, 134.13, 130.12, 128.28, 125.88, 123.54, 119.87, 110.22, 79.12, 55.07, 46.47, 33.95, 28.28, 23.79. HRMS (ESI) *m/z* cal. for (C<sub>18</sub>H<sub>27</sub>NO<sub>3</sub> + H)<sup>+</sup> 306.1991, found 306.1909.

#### (*Z*)-tert-butyl 2-(4-bromostyryl)pyrrolidine-1-carboxylate (7e)<sup>8</sup>:

Prepared following the general procedure B, using (*E*)-1-(2-Benzenesulfonyl-vinyl)-4-bromo-benzene

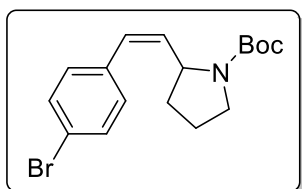

(97 mg, 0.30 mmol, 1.00 equiv.), Boc-Pro-OH (129 mg, 0.60 mmol, 2 equiv.), 4CzIPN (2.3 mg, 0.003 mmol, 0.01 equiv.), Cs<sub>2</sub>CO<sub>3</sub> (195 mg, 0.60 mmol, 2 equiv.) and 1,4-dioxane (4.0 ml). After 48h, the reaction mixture was subjected to the workup protocol outlined in the general procedure B. Purification by preparative TLC using 9:1 hexane: EtOAc provided the title compound (68 mg, 65%, 08:92 *E:Z*) as a colorless solid. <sup>1</sup>H NMR (400 MHz, CDCl<sub>3</sub>) δ (*Z*-isomer) 7.44 (d, *J* = 8.4 Hz, 2H), 7.24-7.04 (m, 2H), 6.32 (d, *J* = 11.7 Hz, 1H), 5.64 (t, *J* = 8 Hz, 1H), 4.65 (br. s, 1H), 3.44 (br. s, 2H), 2.17 (br. s, 1H), 1.97-1.79 (m, 3H), 1.30 (s, 9H). <sup>13</sup>C NMR (126 MHz, CDCl<sub>3</sub>) δ (*Z*-isomer) 154.58, 135.91, 135.78, 131.28, 130.42, 120.70, 79.26, 54.88, 46.61, 33.81, 28.46, 23.83.

#### (*Z*)-tert-butyl 2-styrylpiperidine-1-carboxylate (7f)<sup>7</sup>:

Prepared following the general procedure B, using (*E*)-(2-(phenylsulfonyl)vinyl)benzene (73 mg, 0.30

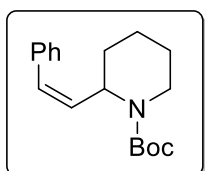

mmol, 1.00 equiv.), Boc-Pipecolic acid (137 mg, 0.60 mmol, 2 equiv.), 4CzIPN (2.3 mg, 0.003 mmol, 0.01 equiv.), Cs<sub>2</sub>CO<sub>3</sub> (195 mg, 0.60 mmol, 2 equiv.) and 1,4-dioxane (4.0 ml). After 48h, the reaction mixture was subjected to the workup protocol outlined in the general procedure B. Purification by preparative TLC using 9:1 hexane:EtOAc provided the title compound (67 mg, 81%, 08:92 *E:Z*) as a colorless solid. <sup>1</sup>H NMR (400 MHz, CDCl<sub>3</sub>) δ (*Z*-isomer) 7.34-7.27 (m, 4H), 7.24-7.20 (m, 1H), 6.48 (d, *J* = 11.9 Hz, 1H), 5.97 (dd, *J* = 11.9, 9.4 Hz, 16H), 5.30-5.28 (m, 1H), 3.97 (d, *J* = 10.8 Hz, 1H), 3.00-2.93 (m, 1H), 1.77-1.72 (m, 2H), 1.66-1.62 (m, 4H), 1.24 (s, 9H). <sup>1</sup>H NMR (400 MHz, CDCl<sub>3</sub>) δ (*E*-isomer) 6.41 (d, *J* = 16 Hz, 1H), 6.20 (dd, *J* = 16, 5 Hz, 1H), 1.46 (s, 9H); the remaining signals could not be determined. <sup>13</sup>C NMR (101 MHz, CDCl<sub>3</sub>) δ (*Z*-isomer) 155.14, 136.94, 129.55, 129.36, 128.68, 128.24, 126.93, 79.25, 48.74, 39.39, 30.48, 28.38, 28.19, 28.09, 25.47, 19.82.

#### (*Z*)-2-styryl-tetrahydrofuran (7g)<sup>7</sup>:

Prepared following the general procedure B, using (*E*)-(2-(phenylsulfonyl)vinyl)benzene (73 mg, 0.30

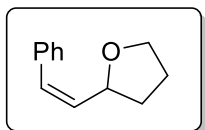

mmol, 1.00 equiv.), tetrahydro 2-furoic acid (69 mg, 0.60 mmol, 2 equiv.), 4CzIPN (2.3 mg, 0.003 mmol, 0.01 equiv.), Cs<sub>2</sub>CO<sub>3</sub> (195 mg, 0.60 mmol, 2 equiv.) and 1,4-dioxane (4.0 ml). After 48h, the reaction mixture was subjected to the workup protocol outlined in the general procedure B. Purification by preparative TLC using 9:1 hexane: EtOAc provided the title compound (36 mg, 70%, 18:82 *E:Z*) as a colorless solid. <sup>1</sup>H NMR (400 MHz, CDCl<sub>3</sub>) δ (*Z*-isomer) 7.39-7.22 (m, 5H), 6.58 (d, *J* = 11.6 Hz, 1H), 5.71 (dd, *J* = 11.6, 9.0

Hz, 1H), 4.66 (dd,  $J = 8$  Hz, 1H), 3.96 (dd,  $J = 7.7$  Hz, 1H), 3.82-3.76 (m, 1H), 2.18-2.11 (m, 1H), 2.06-1.90 (m, 2H), 1.74-1.65 (m, 1H).  $^1\text{H}$  NMR (400 MHz,  $\text{CDCl}_3$ )  $\delta$  (*E*-isomer) 6.58 (d,  $J = 15.9$  Hz, 1H), 6.21 (dd,  $J = 15.9, 6.6$  Hz, 1H), 4.49 (d,  $J = 6.8$  Hz, 1H), 4.21 (d,  $J = 6.3$  Hz, 1H), 3.84 (d,  $J = 6.4$  Hz, 1H); the remaining signals could not be determined.  $^{13}\text{C}$  NMR (101 MHz,  $\text{CDCl}_3$ )  $\delta$  (*Z*-isomer) 136.72, 132.87, 131.49, 128.84, 128.16, 127.11, 79.67, 75.07, 68.18, 68.08, 32.93, 26.39.

**(*Z*)-*tert*-butyl cinnamylcarbamate(7h):**

Prepared following the general procedure B, using (*E*)-(2-(phenylsulfonyl)vinyl)benzene (73 mg, 0.30 mmol, 1.00 equiv.), Boc-Gly-OH (105 mg, 0.60 mmol, 2 equiv.), 4CzIPN (2.3 mg, 0.003 mmol, 0.01

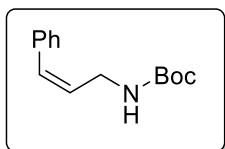

equiv.),  $\text{Cs}_2\text{CO}_3$  (195 mg, 0.60 mmol, 2 equiv.) and 1,4-dioxane (4.0 ml). After 48h, the reaction mixture was subjected to the workup protocol outlined in the general procedure B. Purification by preparative TLC using 16:1 hexane: EtOAc provided the title compound (56 mg, 80%, 0:100 *E:Z*) as a colorless liquid.  $^1\text{H}$  NMR (500 MHz,  $\text{CDCl}_3$ )  $\delta$  (*Z*-isomer) 7.36 (t,  $J = 8$  Hz, 2H), 7.28-7.23 (m, 3H), 6.57 (d,  $J = 11.5$  Hz, 1H), 5.70 (dt,  $J = 12, 6.5$  Hz, 1H), 4.61 (br. s, 1H), 4.06 (s, 2H), 1.47 (s, 9H).  $^{13}\text{C}$  NMR (126 MHz,  $\text{CDCl}_3$ )  $\delta$  (*Z*-isomer) 155.27, 136.46, 131.16, 128.88, 128.74, 128.29, 127.17, 79.46, 39.03, 28.40. HRMS (ESI)  $m/z$  cal. for ( $\text{C}_{14}\text{H}_{19}\text{NO}_2 + \text{NH}_4$ ) $^+$  251.1754, found 251.1824.

**(*Z*)-*tert*-butyl 4-methyl-1-phenylpent-1-en-3-ylcarbamate (7i):**

Prepared following the general procedure B, using (*E*)-(2-(phenylsulfonyl)vinyl)benzene (73 mg, 0.30 mmol, 1.00 equiv.), Boc-Val-OH (130 mg, 0.60 mmol, 2 equiv.), 4CzIPN (2.3 mg, 0.003 mmol, 0.01

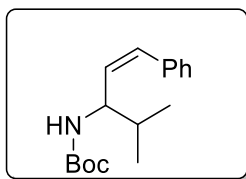

equiv.),  $\text{Cs}_2\text{CO}_3$  (195 mg, 0.60 mmol, 2 equiv.) and 1,4-dioxane (4.0 ml). After 48h, the reaction mixture was subjected to the workup protocol outlined in the general procedure B. Purification by preparative TLC using 14:1 hexane: EtOAc provided the title compound (64 mg, 78%, 10:90 *E:Z*) as a colorless liquid.  $^1\text{H}$  NMR (500 MHz,  $\text{CDCl}_3$ )  $\delta$  (*Z*-isomer) 7.39-9.34 (m, 5H), 6.55 (d,  $J = 12$  Hz, 1H), 5.51 (dd,  $J = 12, 9.5$  Hz, 1H), 4.52 (br. s, 2H), 1.79-1.75 (m, 1H), 1.49 (s, 9H), 0.91 (dd,  $J = 6.5$  Hz, 6H), and the remains peaks for the *E*-isomer.  $^{13}\text{C}$  NMR (126 MHz,  $\text{CDCl}_3$ )  $\delta$  (*Z*-isomer) 155.28, 136.79, 130.75, 128.74, 128.30, 127.01, 126.36, 79.15, 55.15, 53.47, 33.50, 32.84, 28.39, 19.95, 18.32, 18.19, and the remains peaks for the *E*-isomer. HRMS (ESI)  $m/z$  cal. for ( $\text{C}_{17}\text{H}_{25}\text{NO}_2 + \text{H}$ ) $^+$  276.1958, found 276.2025.

**(*Z*)-*tert*-butyl 4-methyl-1-phenylhex-1-en-3-ylcarbamate (7j):**

Prepared following the general procedure B, using (*E*)-(2-(phenylsulfonyl)vinyl)benzene (73 mg, 0.30 mmol, 1.00 equiv.), Boc-Ile-OH (138 mg, 0.60 mmol, 2 equiv.), 4CzIPN

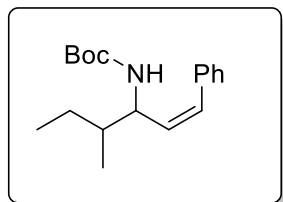

(2.3 mg, 0.003 mmol, 0.01 equiv.),  $\text{Cs}_2\text{CO}_3$  (195 mg, 0.60 mmol, 2 equiv.) and 1,4-dioxane (4.0 ml). After 48h, the reaction mixture was subjected to the workup protocol outlined in the general procedure B. Purification by preparative TLC using 14:1 hexane: EtOAc provided the title compound (65 mg, 76%, 10:90 *E:Z*) as a colorless solid.  $^1\text{H}$  NMR (500 MHz,  $\text{CDCl}_3$ )  $\delta$  (*Z*-isomer) 7.36-7.17 (m, 5H), 6.54-6.48 (m, 1H), 5.52-5.46 (m, 1H), 4.57

(br. s, 2H), 1.54-1.50 (m, 1H), 1.43 (br. s, 9H), 1.08-0.77 (m, 8H), and the remains peaks for the *E*-isomer.  $^{13}\text{C}$  NMR (126 MHz,  $\text{CDCl}_3$ )  $\delta$  (*Z*-isomer) 155.25, 136.81, 130.29, 128.72, 128.50, 128.29, 127.00, 126.35, 79.09, 52.13, 42.29, 28.41, 26.02, 14.16, 11.58. HRMS (ESI)  $m/z$  cal. for ( $\text{C}_{18}\text{H}_{27}\text{NO}_2 + \text{Na}$ ) $^+$  312.1934, found 312.1913.

**(*Z*)-*tert*-butyl 1,4-diphenylbut-3-en-2-ylcarbamate (7k):**

Prepared following the general procedure B, using (*E*)-(2-(phenylsulfonyl)vinyl)benzene (73 mg, 0.30 mmol, 1.00 equiv.), Boc-Phe-OH (159 mg, 0.60 mmol, 2 equiv.), 4CzIPN (2.3 mg, 0.003 mmol, 0.01 equiv.), Cs<sub>2</sub>CO<sub>3</sub> (195 mg, 0.60 mmol, 2.00 equiv.) and 1,4-dioxane (4.0 ml). After 48h, the reaction mixture was subjected to the workup protocol outlined in the general procedure B. Purification by preparative TLC using 14:1 hexane: EtOAc provided the title compound (74 mg, 77%, 10:90 *E:Z*) as a colorless solid. <sup>1</sup>H NMR (500 MHz, CDCl<sub>3</sub>) δ (*Z*-isomer) 7.35-7.17 (m, 10H), 6.51 (d, *J* = 12 Hz, 1H), 5.54 (t, *J* = 11 Hz, 1H), 4.88 (br. s, 1H), 4.52 (br. s, 1H), 2.96-2.81 (m, 2H), 1.45 (s, 9H), and the remains peaks for the *E*-isomer. <sup>13</sup>C NMR (126 MHz, CDCl<sub>3</sub>) δ (*Z*-isomer) 154.91, 137.37, 136.48, 129.72, 129.60, 128.79, 128.58, 128.28, 127.13, 126.43, 79.39, 49.78, 41.97, 28.42, 28.38, 38.35, and the remains peaks for the *E*-isomer. HRMS (ESI) *m/z* cal. for (C<sub>21</sub>H<sub>25</sub>NO<sub>2</sub> + H)<sup>+</sup> 324.1958, found 324.1942.

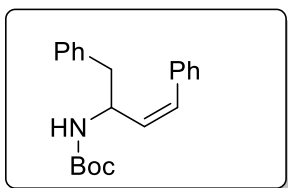

**(*Z*)-tert-butyl methyl(4-methyl-1-phenylpent-1-en-3-yl)carbamate (7l):**

Prepared following the general procedure B, using (*E*)-(2-(phenylsulfonyl)vinyl)benzene (73 mg, 0.30 mmol, 1.00 equiv.), N-Boc-N-methyl-Val-OH (138 mg, 0.60 mmol, 2 equiv.), 4CzIPN (2.3 mg, 0.003 mmol, 0.01 equiv.), Cs<sub>2</sub>CO<sub>3</sub> (195 mg, 0.60 mmol, 2 equiv.) and 1,4-dioxane (4.0 ml). After 48h, the reaction mixture was subjected to the workup protocol outlined in the general procedure B. Purification by preparative TLC using 9:1 hexane: EtOAc provided the title compound (65 mg, 75%, 12:88 *E:Z*) as a colorless solid. <sup>1</sup>H NMR (400 MHz, CDCl<sub>3</sub>) δ (*Z*-isomer) 7.30-7.25 (m, 5H), 6.49 (d, *J* = 10.4 Hz, 1H), 5.59 (br. s, 1H), 4.68-4.52 (m, 1H), 2.80 (br. s, 3H), 1.40 (s, 9H), 0.85 (d, *J* = 6.4 Hz, 6H); <sup>1</sup>H NMR (400 MHz, CDCl<sub>3</sub>) δ (*E*-isomer) 6.50 (d, *J* = 16 Hz, 1H), 6.00 (dd, *J* = 16, 6.4 Hz, 1H), 4.28 (br. s, 1H), 3.00 (br. s, 3H), 1.90 (br. s, 1H), 1.45 (s, 9H), 0.95 (d, *J* = 6.4 Hz, 6H); the remaining signals could not be determined. <sup>13</sup>C NMR (101 MHz, CDCl<sub>3</sub>) δ (*Z*-isomer) 155.61, 136.95, 132.73, 129.90, 128.80, 128.55, 128.20, 127.04, 126.34, 79.43, 58.60, 31.44, 28.44, 19.66, 19.17. HRMS (ESI) *m/z* cal. for (C<sub>18</sub>H<sub>27</sub>NO<sub>2</sub> + H)<sup>+</sup> 290.2042, found 290.2119.

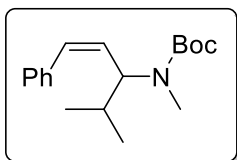

**(*Z*)-tert-butyl cinnamyl(methyl)carbamate (7m)<sup>7</sup>:**

Prepared following the general procedure B, using (*E*)-(2-(phenylsulfonyl)vinyl)benzene (73 mg, 0.30 mmol, 1.00 equiv.), N-Boc-N-methyl-Gly-OH (113 mg, 0.60 mmol, 2 equiv.), 4CzIPN (2.3 mg, 0.003 mmol, 0.01 equiv.), Cs<sub>2</sub>CO<sub>3</sub> (195 mg, 0.60 mmol, 2 equiv.) and 1,4-dioxane (4.0 ml). After 48h, the reaction mixture was subjected to the workup protocol outlined in the general procedure B. Purification by preparative TLC using 9:1 hexane:EtOAc provided the title compound (52 mg, 70%, 10:90 *E:Z*) as a colorless solid. <sup>1</sup>H NMR (400 MHz, CDCl<sub>3</sub>) δ (*Z*-isomer) 7.36-7.20 (m, 5H), 6.59 (d, *J* = 12 Hz, 1H), 5.63 (dt, *J* = 12.4, 6.4 Hz, 1H), 4.12 (br. s, 2H), 2.77 (s, 3H), 1.43 (s, 9H); <sup>1</sup>H NMR (400 MHz, CDCl<sub>3</sub>) δ (*E*-isomer) 6.46 (d, *J* = 18.0 Hz, 1H), 6.16 (dd, 1H), 3.98 (s, 2H), 2.86 (s, 3H), 1.47 (s, 9H); the remaining signals could not be determined. <sup>13</sup>C NMR (126 MHz, CDCl<sub>3</sub>) δ (*Z*-isomer) 155.75, 136.65, 131.29, 128.79, 128.56, 128.23, 127.55, 127.04, 126.35, 79.50, 46.80, 33.72, 28.42.

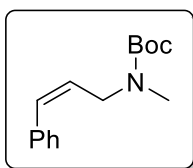

**tert-butyl (*Z*)-2-(2-(trifluoromethyl)styryl)pyrrolidine-1-carboxylate (7o):**



Prepared following the general procedure B, using (*E*)-1-(2-(phenylsulfonyl)vinyl)-2-(trifluoromethyl)benzene (90 mg, 0.30 mmol, 1.00 equiv.), Boc-Pro-OH (129 mg, 0.60 mmol, 2 equiv.), 4CzIPN (2.3 mg, 0.003 mmol, 0.01 equiv.), Cs<sub>2</sub>CO<sub>3</sub> (195 mg, 0.60 mmol, 2 equiv.) and 1,4-dioxane (4.0 ml). After 56h, the reaction mixture was subjected to the workup protocol outlined in the general procedure B. Purification by preparative TLC using 9:1 hexane:EtOAc provided the title compound (66 mg, 71%, 0:100 *E:Z*) as a colorless liquid. <sup>1</sup>H NMR (400 MHz, CDCl<sub>3</sub>) δ (*Z*-isomer) 7.67-7.52 (m, 3H), 7.36 (t, *J* = 7.6 Hz, 1H), 5.63 (d, *J* = 11.6 Hz, 1H), 5.80-5.75 (m, 1H), 4.62 (m, 1H), 3.44 (br. s, 1H), 1.93-1.87 (m, 1H), 1.78-1.75 (m, 2H), 1.29 (s, 9H). <sup>1</sup>H NMR (400 MHz, CDCl<sub>3</sub>) δ (*E*-isomer) 6.10 (br. s, 1H), 4.40 (br. s, 1H), 3.65 (br. s, 1H), 1.43 (s, 9H). <sup>13</sup>C NMR (126 MHz, CDCl<sub>3</sub>) δ 154.67, 136.61, 131.60, 128.67, 128.44, 126.97, 125.87, 125.44, 123.26, 79.50, 54.85, 46.79, 29.80, 28.60, 23.88. HRMS (ESI) *m/z* cal. for (C<sub>18</sub>H<sub>22</sub>F<sub>3</sub>NNaO<sub>2</sub> + Na)<sup>+</sup> 364.1495, found 364.1373.

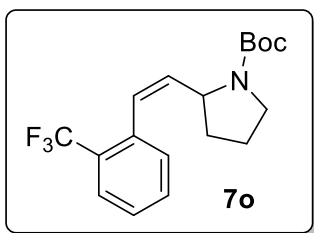

#### tert-butyl (*Z*)-2-(4-(methoxycarbonyl)styryl)pyrrolidine-1-carboxylate (**7p**):

Prepared following the general procedure B, using methyl (*E*)-4-(2-(phenylsulfonyl)vinyl)benzoate (90 mg, 0.30 mmol, 1.00 equiv.), Boc-Pro-OH (129 mg, 0.60 mmol, 2 equiv.), 4CzIPN (2.3 mg, 0.003 mmol, 0.01 equiv.), Cs<sub>2</sub>CO<sub>3</sub> (195 mg, 0.60 mmol, 2 equiv.) and 1,4-dioxane (4.0 ml). After 56h, the reaction mixture was subjected to the workup protocol outlined in the general procedure B. Purification by preparative TLC using 6:1 hexane:EtOAc provided the title compound (59 mg, 60%, 33:77 *E:Z*) as a colorless liquid. <sup>1</sup>H NMR (400 MHz, CDCl<sub>3</sub>) δ (*Z*-isomer) 8.00-7.98 (m, 2H), 7.40-7.32 (m, 2H), 6.42 (d, *J* = 12 Hz, 1H), 5.71 (m, 1H), 4.68 (m, 1H), 3.89 (s, 3H), 3.45 (br. s, 2H), 2.21-1.82 (m, 4H), 1.26 (s, 9H). <sup>1</sup>H NMR (400 MHz, CDCl<sub>3</sub>) δ (*E*-isomer) 6.10 (br. s, 1H), 4.40 (br. s, 1H), 3.65 (br. s, 1H), 1.43 (s, 9H); the remains peak for the *E*-isomer. <sup>13</sup>C NMR (126 MHz, CDCl<sub>3</sub>) δ 154.59, 139.26, 137.02, 129.49, 128.75, 79.32, 54.98, 52.03, 46.65, 31.91, 29.68, 28.45, 22.66. HRMS (ESI) *m/z* cal. for (C<sub>18</sub>H<sub>22</sub>F<sub>3</sub>NNaO<sub>2</sub> + Na)<sup>+</sup> 364.1495, found 364.1373.

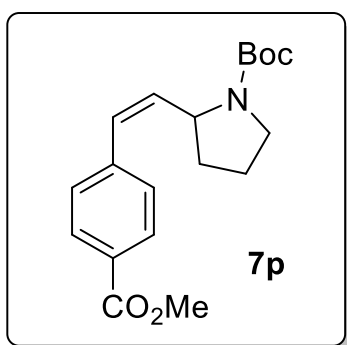

## 5. Experimental Data for Decarboxylative allylation Products:

#### tert-butyl 2-(3-phenylprop-1-en-2-yl)pyrrolidine-1-carboxylate (**8a**)<sup>9</sup>:

Synthesized using general procedure C and the crude residue was purified by column chromatography using neutral alumina to give the product **8a** in 63% yield (42 mg) as a pale yellow semisolid; <sup>1</sup>H NMR (400 MHz, CDCl<sub>3</sub>) δ ppm 7.54-7.46 (m, 2H), 7.33-7.25 (m, 3H), 5.35 (s, 1H), 5.06 (s, 1H), 3.94-3.79 (m, 1H), 3.36-3.17 (m, 3H), 2.32-2.23 (m, 1H), 1.78-1.71 (m, 4H), 1.52-1.46 (m, 9H); <sup>13</sup>C NMR (125 MHz, CDCl<sub>3</sub>) δ ppm 154.63, 145.86, 140.34, 128.42, 127.69, 126.30, 115.01, 114.58, 79.53, 55.97, 55.75, 46.77, 46.38, 40.01, 38.99, 28.79, 23.59, 22.67; HRMS (ESI): *m/z* calculated for [C<sub>18</sub>H<sub>25</sub>NO<sub>2</sub> + H]<sup>+</sup> : 288.1958, found: 288.1956.

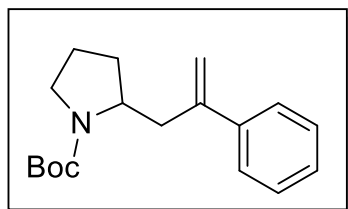

#### tert-butyl (2-benzylallyl)carbamate (**8b**)<sup>10</sup>:

Synthesized using general procedure C and the crude residue was purified by column chromatography using neutral alumina to give the product **8b** in 73% yield (42 mg) as a pale yellow semisolid; <sup>1</sup>H NMR (400 MHz, CDCl<sub>3</sub>) δ ppm 7.42-7.25 (m, 5H), 5.37-5.36 (m, 1H), 5.11-5.10 (m, 1H), 4.55 (br. s, 1H), 3.25-3.23 (m, 2H), 2.71-2.68 (m, 2H), 1.42 (s, 9H); <sup>13</sup>C NMR (125 MHz, CDCl<sub>3</sub>) δ ppm 155.99, 145.65, 140.57, 128.59, 127.80, 126.23, 114.27, 79.30, 39.34, 35.75, 28.57.

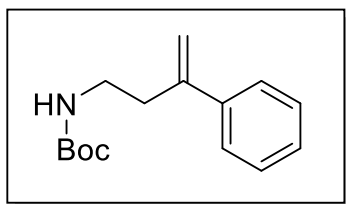

**tert-butyl (3-benzylbut-3-en-2-yl)carbamate (8c):**

Synthesized using general procedure C and the crude residue was purified by column chromatography using neutral alumina to give the product **8c** in 68% yield (41 mg) as a pale yellow semisolid; <sup>1</sup>H NMR (400 MHz, CDCl<sub>3</sub>) δ ppm 7.42-7.25(m, 5H), 5.33-5.32 (m, 1H), 5.09-5.08 (m, 1H), 4.32 (br. s, 1H), 3.72 (br. s, 1H), 2.84-2.78 (m, 1H), 2.52-2.46 (m, 1H), 1.41 (s, 9H), 1.08-1.05 (m, 3H); <sup>13</sup>C NMR (100 MHz, CDCl<sub>3</sub>) δ ppm 155.34, 145.64, 140.55, 128.54, 127.68, 126.39, 115.20, 79.62, 46.96, 41.51, 27.20, 20.73. HRMS (ESI): m/z calculated for [C<sub>16</sub>H<sub>23</sub>NO<sub>2</sub> + Na]<sup>+</sup> : 284.1621, found: 284.1638.

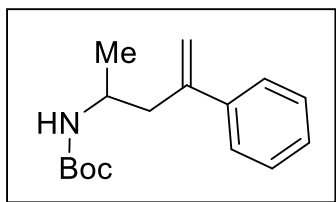

**tert-butyl (2-benzyl-4-methylpent-1-en-3-yl)carbamate (8d):**

Synthesized using general procedure C and the crude residue was purified by column chromatography using neutral alumina to give the product **8d** in 66% yield (45 mg) as a pale yellow semisolid; <sup>1</sup>H NMR (400 MHz, CDCl<sub>3</sub>): δ ppm 7.40-7.25 (m, 5H), 5.29-5.28 (m, 1H), 5.09 (s, 1H), 4.28-4.08 (m, 1H), 3.72-3.56 (m, 1H), 2.75-2.40 (m, 2H), 1.49-1.25 (m, 9H), 0.88-0.77 (m, 6H); <sup>13</sup>C NMR (125 MHz, CDCl<sub>3</sub>): δ ppm 155.71, 146.17, 141.08, 128.46, 127.59, 126.44, 114.92, 78.85, 53.59, 50.98, 39.06, 38.43, 37.83, 37.06, 29.84, 28.53, 26.51, 25.03, 17.80, 13.88, 7.21. HRMS (ESI): m/z calculated for [C<sub>18</sub>H<sub>27</sub>NO<sub>2</sub> + H]<sup>+</sup> : 290.2115, found: 290.2068.

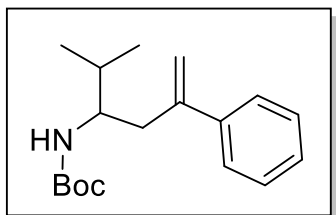

**tert-butyl (3-benzyl-1-phenylbut-3-en-2-yl)carbamate (8e):**

Synthesized using general procedure C and the crude residue was purified by column chromatography using neutral alumina to give the product **8e** in 61% yield (48 mg) as a pale yellow semisolid; <sup>1</sup>H NMR (400 MHz, CDCl<sub>3</sub>) δ ppm 7.31-7.11 (m, 10H), 5.33 (s, 1H), 5.11 (s, 1H), 4.32 (br. s, 1H), 3.86 (br. s, 1H), 2.78-2.61 (m, 4H), 1.44-1.25 (m, 9H); <sup>13</sup>C NMR (125 MHz, CDCl<sub>3</sub>) δ ppm 155.37, 145.67, 140.28, 138.43, 129.62, 128.53, 128.46, 127.71, 126.45, 126.41, 120.45, 119.56, 115.36, 80.14, 50.76, 40.78, 40.23, 28.48. HRMS (ESI): m/z calculated for [C<sub>22</sub>H<sub>27</sub>NO<sub>2</sub> + H]<sup>+</sup> 338.2115, found: 338.2125.

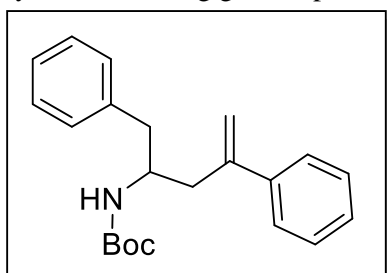

**tert-butyl (2-benzyl-5-(methylthio)pent-1-en-3-yl)carbamate (8f):**

Synthesized using general procedure C and the crude residue was purified by column chromatography

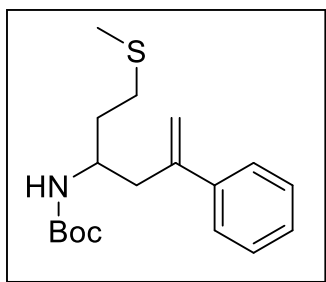

using neutral alumina to give the product **8f** in 70% yield (52 mg) as a pale yellow semisolid; <sup>1</sup>H NMR (400 MHz, CDCl<sub>3</sub>) δ ppm 7.41-7.24 (m, 5H), 5.33-5.31 (m, 1H), 5.10-5.08 (m, 1H), 4.32 (br. s, 1H), 3.71 (br. s, 1H), 2.73-2.63 (m, 2H), 2.53-2.51 (m, 2H), 2.49-2.41 (m, 3H), 2.11-2.00 (m, 1H), 1.78-1.58 (m, 1H), 1.37 (s, 9H); <sup>13</sup>C NMR (100 MHz, CDCl<sub>3</sub>) δ ppm 155.50, 145.42, 140.94, 128.59, 127.77, 126.39, 115.51, 79.22, 49.26, 41.23, 34.45, 30.81, 28.51, 15.62. HRMS (ESI): m/z calculated for [C<sub>18</sub>H<sub>27</sub>NO<sub>2</sub>S + H]<sup>+</sup> 322.1835, found: 322.1818.

**tert-butyl (2-benzyl-4-methylhex-1-en-3-yl)carbamate (8g):**

Synthesized using general procedure C and the crude residue was purified by column chromatography

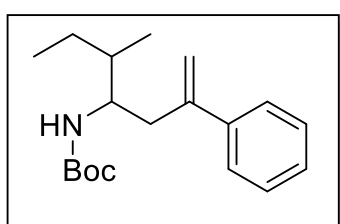

using neutral alumina to give the product **8g** in 71% yield (50 mg) as a pale yellow semisolid; <sup>1</sup>H NMR (400 MHz, CDCl<sub>3</sub>) δ ppm 6.57-6.42 (m, 5H), 4.46-4.45 (m, 1H), 4.27-4.26 (m, 1H), 3.43 (d, *J* = 9.2 Hz, 1H), 2.89-2.78 (m, 1H), 1.92-1.57 (m, 2H), 0.67-0.43 (m, 11H), 0.06-0.01 (m, 6H); <sup>13</sup>C NMR (125 MHz, CDCl<sub>3</sub>) δ ppm 155.31, 146.19, 128.80, 128.47, 127.60, 126.45, 126.28, 114.95, 114.80, 78.85, 59.44, 53.60, 52.35, 39.08, 38.44, 37.83, 37.51, 28.53, 28.17,

26.51, 25.04, 16.68, 15.31, 13.89, 11.99, 11.85, 11.67. HRMS (ESI): m/z calculated for C<sub>19</sub>H<sub>29</sub>NO<sub>2</sub> + H<sup>+</sup>: 304.2271, found: 304.2273.

**tert-butyl (2-benzyl-4-methylhex-1-en-3-yl)(methyl)carbamate (8h):**

Synthesized using general procedure C and the crude residue was purified by column chromatography

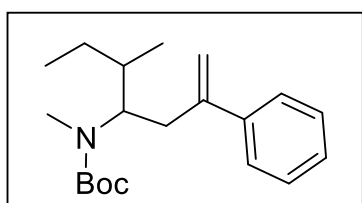

using neutral alumina to give the product **8h** in 76% yield (56 mg) as a pale yellow semisolid; <sup>1</sup>H NMR (400 MHz, CDCl<sub>3</sub>) δ ppm 7.38-7.24 (m, 5H), 5.30-5.21 (m, 1H), 5.06-5.03 (m, 1H), 2.98-2.86 (m, 1H), 2.62-2.50 (m, 4H), 1.54-1.44 (m, 5H), 1.37-1.12 (m, 6H), 0.97-0.75 (m, 7H); <sup>13</sup>C NMR (100 MHz, CDCl<sub>3</sub>) δ ppm 156.2, 146.8, 146.7, 145.9, 145.6, 141.6, 140.6, 140.5, 128.4, 128.3,

128.2, 127.4, 126.2, 126.1, 114.7, 114.3, 114.3, 78.9, 78.8, 57.9, 57.2, 37.1, 36.3, 36.0, 35.8, 35.8, 28.5, 28.4, 28.0, 26.3, 26.2, 25.6, 25.5, 16.3, 15.5, 11.1, 10.9, 10.6. HRMS (ESI): m/z calculated for [C<sub>20</sub>H<sub>31</sub>NO<sub>2</sub> + H]<sup>+</sup> 318.2428, found: 318.2424.

**tert-butyl (3-benzylbut-3-en-2-yl)(methyl)carbamate (8i):**

Synthesized using general procedure C and the crude residue was purified by column chromatography

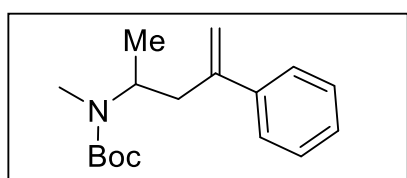

using neutral alumina to give the product **8i** in 82% yield (52 mg) as a pale yellow semisolid; <sup>1</sup>H NMR (400 MHz, CDCl<sub>3</sub>) δ ppm 7.41-7.25 (m, 5H), 5.31 (s, 1H), 5.06 (s, 1H), 4.33-4.17 (m, 1H), 2.70-2.53 (m, 5H), 2.70-2.53 (m, 9H), 1.42-1.06 (m, 3H); <sup>13</sup>C NMR (100 MHz, CDCl<sub>3</sub>) δ ppm 155.6, 145.3, 140.4, 128.4, 127.5, 126.2, 114.6, 79.2, 49.4, 40.3, 39.8, 28.4, 18.0. HRMS

(ESI): m/z calculated for [C<sub>17</sub>H<sub>25</sub>NO<sub>2</sub> + H]<sup>+</sup> 276.1958, found: 276.1955.

**(E)-tert-butyl 2-(3-methoxy-4-(methoxymethoxy)styryl)pyrrolidine-1-carboxylate (9)<sup>1</sup>:**

Prepared following the general procedure A, using (*E*)-4-(2-(phenylsulfonyl)vinyl)-2-methoxy-phenol (87 mg, 0.30 mmol, 1.00 equiv.), Boc-Phe-OH (159 mg, 0.60 mmol, 2 equiv.), 4CzIPN (2.3 mg, 0.003 mmol, 0.01 equiv.), Cs<sub>2</sub>CO<sub>3</sub> (195 mg, 0.60 mmol, 2.00 equiv.) and DMA (5.0 mL). After 50 h, the reaction mixture was subjected to the workup protocol outlined in the general procedure A. Purification by preparative TLC using 14:1 hexane: EtOAc provided the title compound (87 mg, 91%, 100:0 *E:Z*) as a colorless liquid. <sup>1</sup>H NMR (500 MHz, CDCl<sub>3</sub>) δ (*E*-isomer) 7.07 (d, *J* = 8.2 Hz, 1H), 6.90–6.85 (m, 2H), 6.32 (d, *J* = 14.0 Hz, 1H), 5.97 (br. s, 1H), 5.21 (s, 2H), 4.37 (br. s, 1H), 3.89 (s, 3H), 3.48 (s, 3H), 3.45 (br. s, 2H), 2.10–2.00 (m, 1H), 1.91–1.76 (m, 3H), 1.41 (s, 9H). <sup>13</sup>C NMR (126 MHz, CDCl<sub>3</sub>) δ (*E*-isomer) 154.67, 149.85, 146.01, 131.90, 129.43, 129.09, 119.31, 116.52, 109.47, 95.58, 79.17, 58.92, 56.15, 55.88, 46.32, 31.91, 31.62, 28.52, 23.10, 22.66.

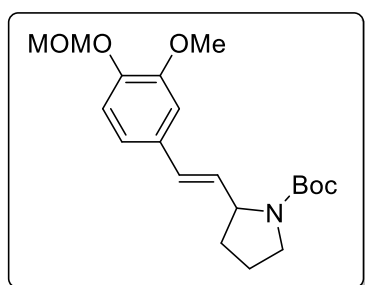

#### (*E*)-2-methoxy-4-(2-(pyrrolidin-2-yl)vinyl)phenol (10):

To a vial containing tert-butyl (*E*)-2-(3-methoxy-4-(methoxymethoxy)styryl)pyrrolidine-1-carboxylate (9) (98 mg, 0.27 mmol) at 0 °C was added trifluoroacetic acid (2.08 mL, 27.0 mmol, 100 equiv.). The mixture was stirred at 0 °C for 2 h before being diluted with MeOH (10 mL) and the mixture concentrated in vacuo. The residue was diluted with MeOH (10 mL) and sat. aq. NaHCO<sub>3</sub> was added to basify the mixture to pH ≥ 7 before removal of the MeOH and water under reduced pressure. Purification by flash column chromatography (100:8:1, DCM: MeOH: NH<sub>3</sub>) yielded the title compound (45 mg, 76%) as a yellow oil. <sup>1</sup>H NMR (500 MHz, CDCl<sub>3</sub>) δ (*E*-isomer) 6.83–6.72 (m, 3H), 6.50 (d, *J* = 15.7 Hz, 1H), 6.11–6.06 (q, *J* = 8 Hz, 1H), 5.93 (br. s, 2H), 4.00 (dd, *J* = 15.7, 8.1 Hz, 1H), 3.81 (s, 3H), 3.27–3.21 (m, 1H), 3.17–3.13 (m, 1H), 2.16–2.10 (m, 1H), 2.05–1.99 (m, 2H), 1.85–1.79 (m, 1H). <sup>13</sup>C NMR (126 MHz, CDCl<sub>3</sub>) δ (*E*-isomer) 147.08, 146.42, 134.42, 128.21, 122.84, 120.63, 114.76, 108.84, 61.80, 55.87, 44.74, 31.66, 24.26. HRMS (ESI) *m/z* cal. for (C<sub>13</sub>H<sub>17</sub>NO<sub>2</sub> + H)<sup>+</sup> 220.1259, found 220.1346.

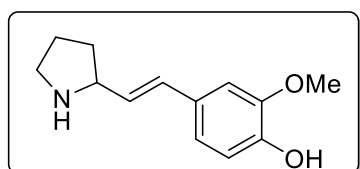

#### (*E*)-tert-butyl 2-(4-((methoxymethoxy)methyl)styryl)pyrrolidine-1-carboxylate (11):

Prepared following the general procedure A, using (*E*)-2-(2-(phenylsulfonyl)vinyl)benzene (73 mg, 0.30 mmol, 1.00 equiv.), Boc-Val-OH (130 mg, 0.60 mmol, 2 equiv.), 4CzIPN (2.3 mg, 0.003 mmol, 0.01 equiv.), Cs<sub>2</sub>CO<sub>3</sub> (195 mg, 0.60 mmol, 2 equiv.) and DMA (5.0 mL). After 50 h, the reaction mixture was subjected to the workup protocol outlined in the general procedure A. Purification by preparative TLC using 14:1 hexane: EtOAc provided the title compound (72 mg, 87%, 95:05 *E:Z*) as a colorless liquid. <sup>1</sup>H NMR (400 MHz, CDCl<sub>3</sub>) δ (*E*-isomer) 7.32–7.30 (m, 4H), 6.38 (d, *J* = 14.1 Hz, 1H), 6.08 (br. s, 1H), 4.70 (s, 2H), 4.57 (s, 2H), 4.37 (br. s, 1H), 3.45 (br. s, 2H), 3.41 (s, 3H), 2.08 (br. s, 1H), 1.95–1.76 (m, 3H), 1.40 (s, 9H). <sup>13</sup>C NMR (101 MHz, CDCl<sub>3</sub>) δ (*E*-isomer) 154.67, 136.86, 136.60, 135.18, 130.84, 129.13, 128.16, 127.75, 126.34, 95.63, 79.19, 68.92, 59.02, 55.35, 46.31, 32.60, 28.49, 23.11. HRMS (ESI) *m/z* cal. for (C<sub>20</sub>H<sub>29</sub>NO<sub>4</sub> + H)<sup>+</sup> 348.2169, found 348.2168.

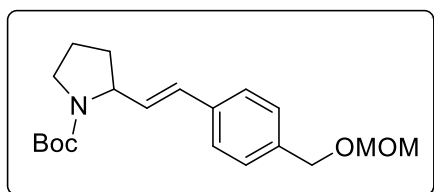

### Photostationary state:

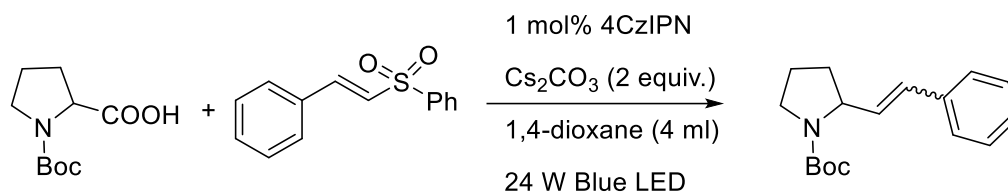

For the photostationary state, we have performed the above reaction and plotted the data from crude reaction mixture in the following time gap 5 h, 10 h, 24 h, 36 h, 48 h, 60 h, 72 h and 80 h. The diastereomeric ratios were determined from the <sup>1</sup>H-NMR of the crude reaction mixture. After 5 h the ratio was (*E/Z*) 95:5, at 10 h the ratio was 85:15, at 24 h the ratio was 50:50, at 36 h the ratio was 33:77, at 48 h the ratio was 08:92, at 60 h the ratio was 10:90, at 72 h the ratio was 12:88.

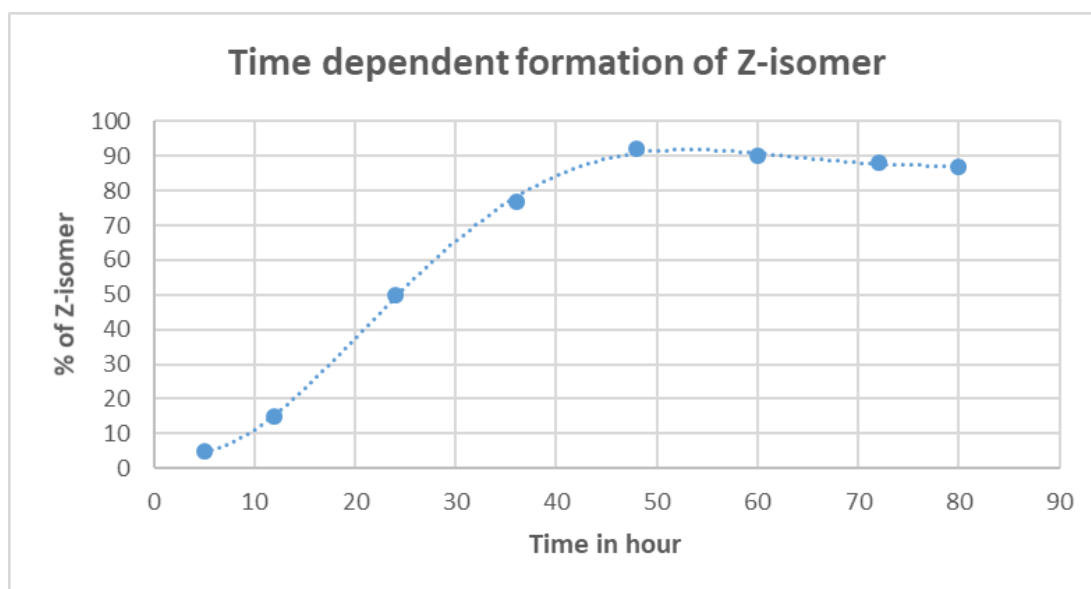

### 6. Stern Volmer Plot:

Emission intensities were recorded on spectrofluorometer (RF-6000, SHIMADZU.CO). All the samples of 4CzIPN were excited at 365 nm and the emission intensities were observed at 510 nm. In this experiment, the appropriate amount of the quencher (**6a** or **7a**) were added in 10<sup>-5</sup>M 1,4-dioxane solution of 4CzIPN. All the data were recorded after degassing all the samples with a stream of argon for 15 min.

Figure 1. Stern-Volmer Plot of 4CzIPN emission quenching with **6a** (*E*-isomer) and **7a** (*Z*-isomer) in 1,4-dioxane, [4CzIPN] = 1.0 × 10<sup>-5</sup> M, λ<sub>ex</sub> = 365 nm, λ<sub>em</sub> = 510 nm.

| <i>E-7a</i> |            |                   | <i>Z-7a</i> |            |                   |
|-------------|------------|-------------------|-------------|------------|-------------------|
| Conc. (mM)  | I          | I <sub>0</sub> /I | Conc. (mM)  | I          | I <sub>0</sub> /I |
| 0           | 233482.886 | 1                 | 0           | 233482.886 | 1                 |
| 1           | 280809.866 | 1.2027            | 1           | 216801.510 | 1.0769            |
| 2           | 283705.054 | 1.2151            | 2           | 223453.502 | 1.0448            |
| 4           | 293114.415 | 1.2554            | 4           | 220201.389 | 1.0603            |
| 6           | 432457.001 | 1.8522            | 6           | 222800.824 | 1.04794           |
| 8           | 542147.261 | 2.3222            | 8           | 225880.799 | 1.0336            |
| 10          | 550132.375 | 2.3562            | 10          | 225894.352 | 1.03359           |

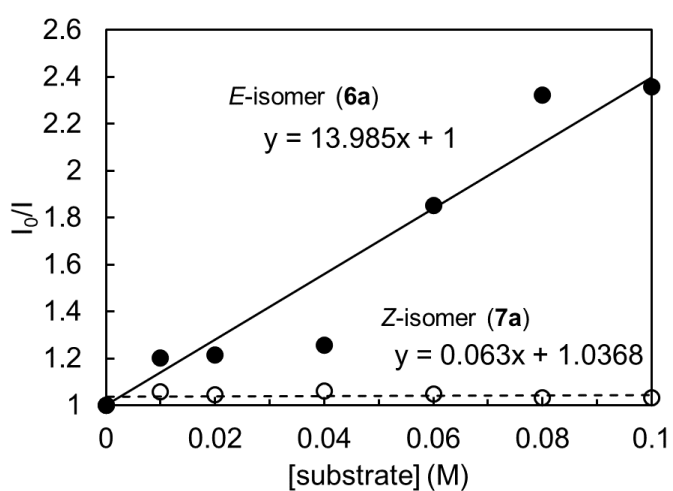

## 7. Fluorescence quenching of excited 4CzIPN\* with *N*-Boc Proline carboxylate:

Figure 2: Fluorescence quenching of excited 4CzIPN\* with *N* Boc Proline carboxylate anion (0.5 M) in DMF (excitation wavelength: 365 nm).

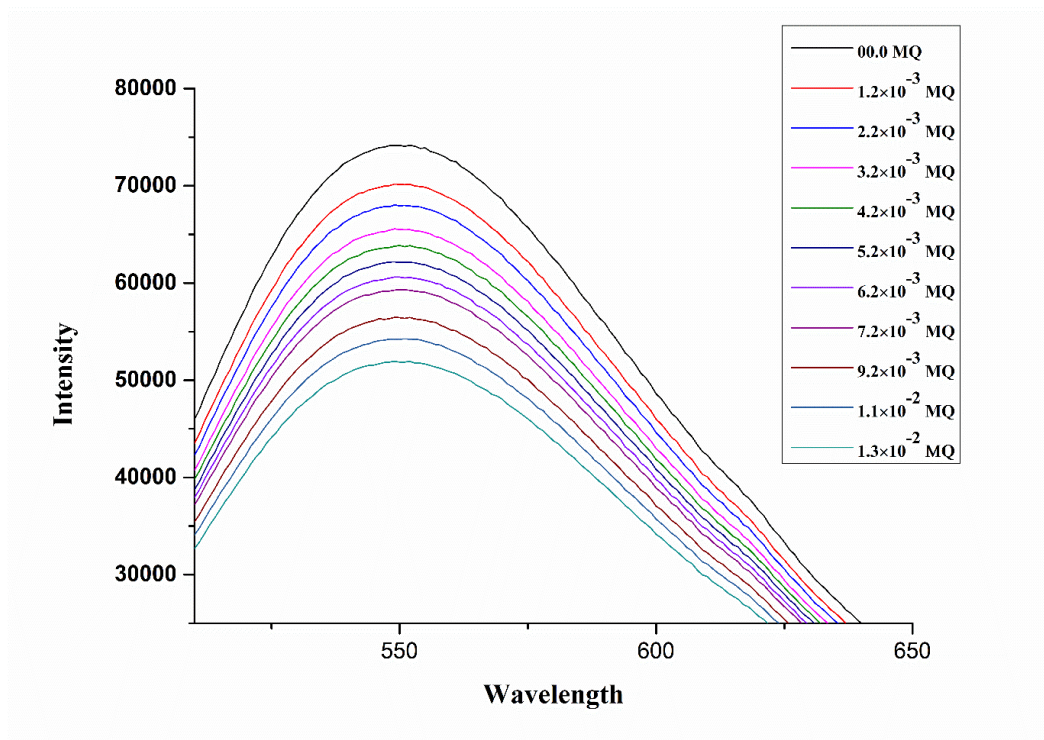

Fluorescence quenching of excited 4CzIPN\* with *N* Boc Proline carboxylate anion (0.5 M) in 1,4-Dioxane (excitation wavelength: 365 nm).

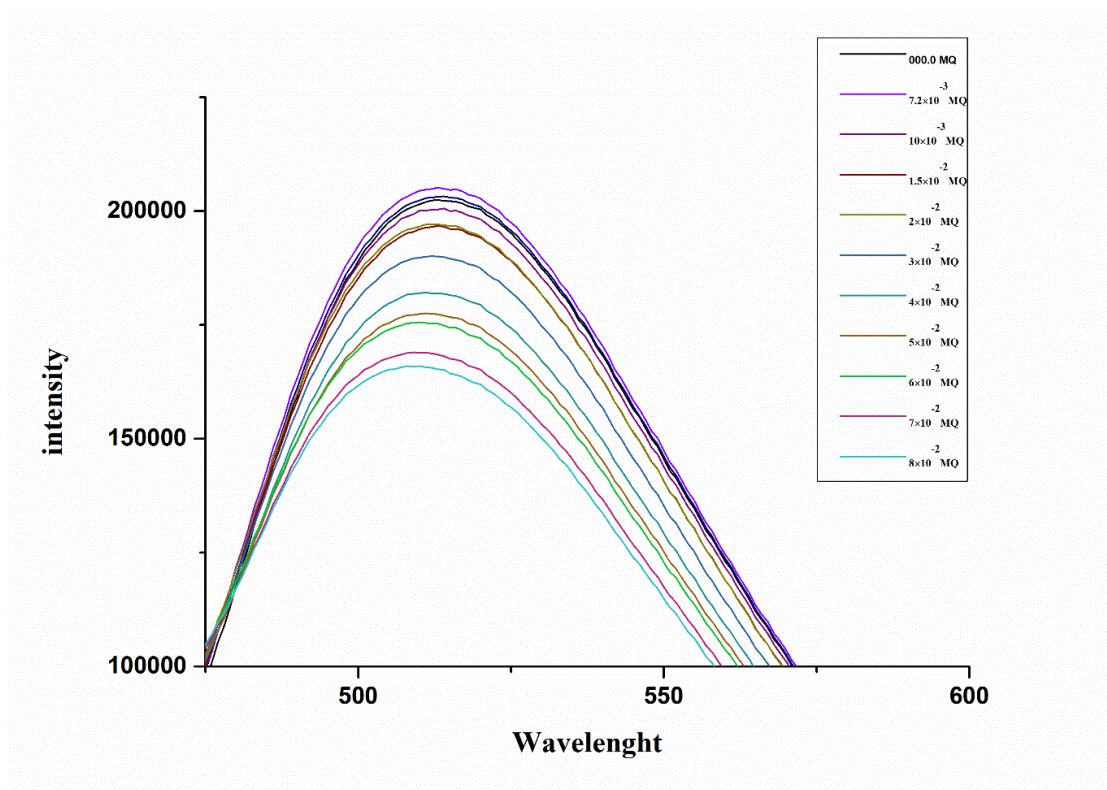

## 8. Control experiment for E to Z isomerization

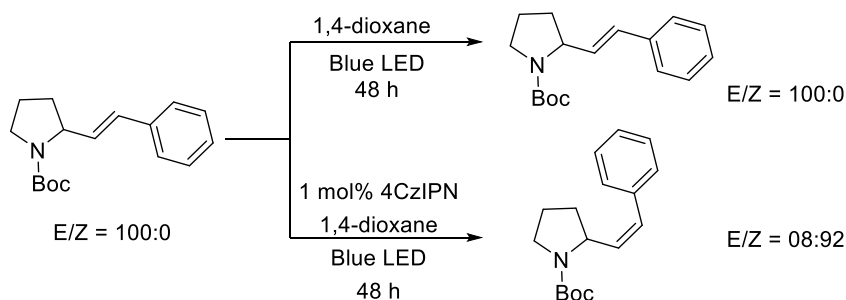

We have done two experiment, where the pure *E*-isomer was subjected to isomerization under the irradiation of blue light with and without the catalyst. We found that after 48 hours in the presence of catalyst *Z*-isomer (E/Z = 08:92) was formed as a major product, whereas without catalyst no isomerisation was observed.

## 9. Phosphorescence spectra of **6a** (*E*-isomer; red line), **7a** (*Z*-isomer; blue line), and 4CzIPN in DMA, toluene and 1,4-dioxane; $\lambda_{\text{ex}} = 330 \text{ nm}$ ; $[M] = 1.0 \times 10^{-5} \text{ M}$ .

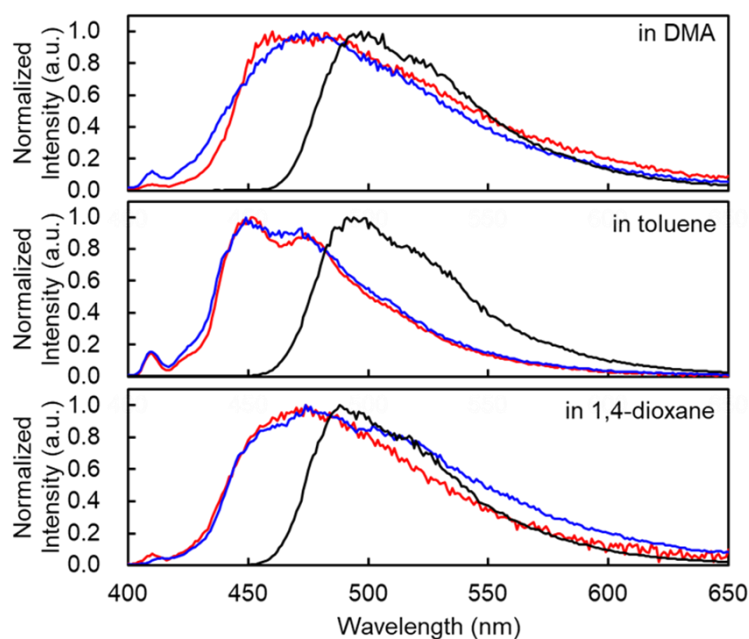

## 10. Normalized fluorescence spectra of **6a** (*E*-isomer) and **7a** (*Z*-isomer) in 1,4-dioxane; $\lambda_{\text{ex}} = 280 \text{ nm}$ ; $[M] = 1.0 \times 10^{-5} \text{ M}$ .



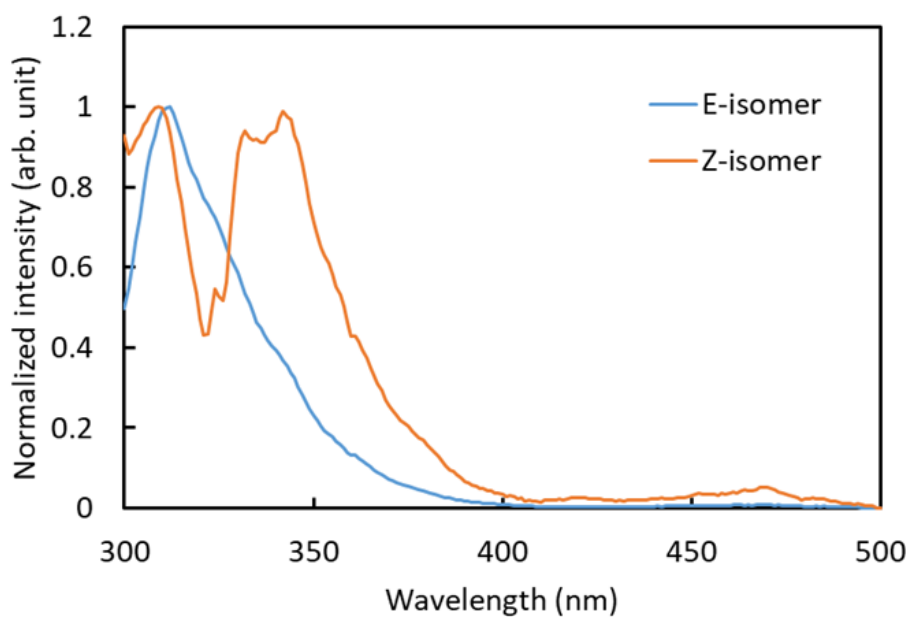

## 11. Reference:

1. A. Nobel, D. W. C. Macmillan, *J. Am. Chem. Soc.*, **2014**, 136, 11602.
2. Y. Lei, R. Qiu, L. Zhang, C. Xu, Y. Pan, X. Qin, L. Xu, Y. Deng, *ChemCatChem Comm.*, **2015**, 7, 1275.
3. S. Akkarasamiyo, S. Sawadjoon, A. Orthaber, M. S. J. Samec, *Chem. Eur. J.*, **2018**, 24, 3488.
4. Carrera, E. D. *Chem. Comm.*, **2017**, 53, 11185.
5. S. Paul, J. Guin, *Green Chem.*, **2017**, 19, 2530.
6. M. P. Sibi, D. Rutherford, P. A. Renhowe, B. Li, *J. Am. Chem. Soc.*, **1999**, 121, 7509.
7. M. M. Mastandrea, S. Cañellas, X. Caldentey, M. A. Pericas, *ACS Catal.*, **2020**, 10, 6402.
8. G. -L. Dai, S.-Z. Lai, Z. Luo, Z. -Y. Tang, *Org. Lett.*, **2019**, 21, 2269.
9. D. R. Heitz, K. Rizwan, G. A. Molander, *J. Org. Chem.*, **2016**, 81, 7308.
10. D. Karila, L. Leman, R. H. Dodd, *Org. Lett.*, **2011**, 13, 5830.

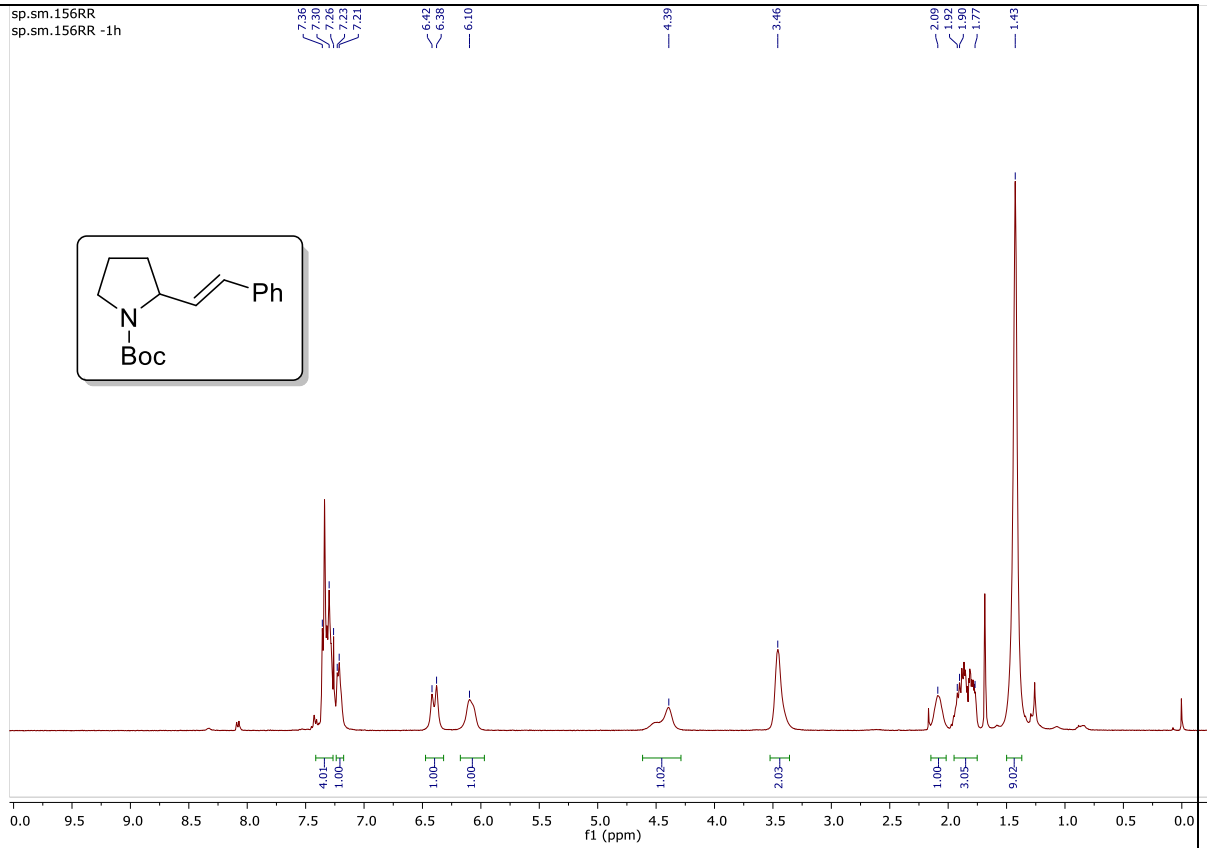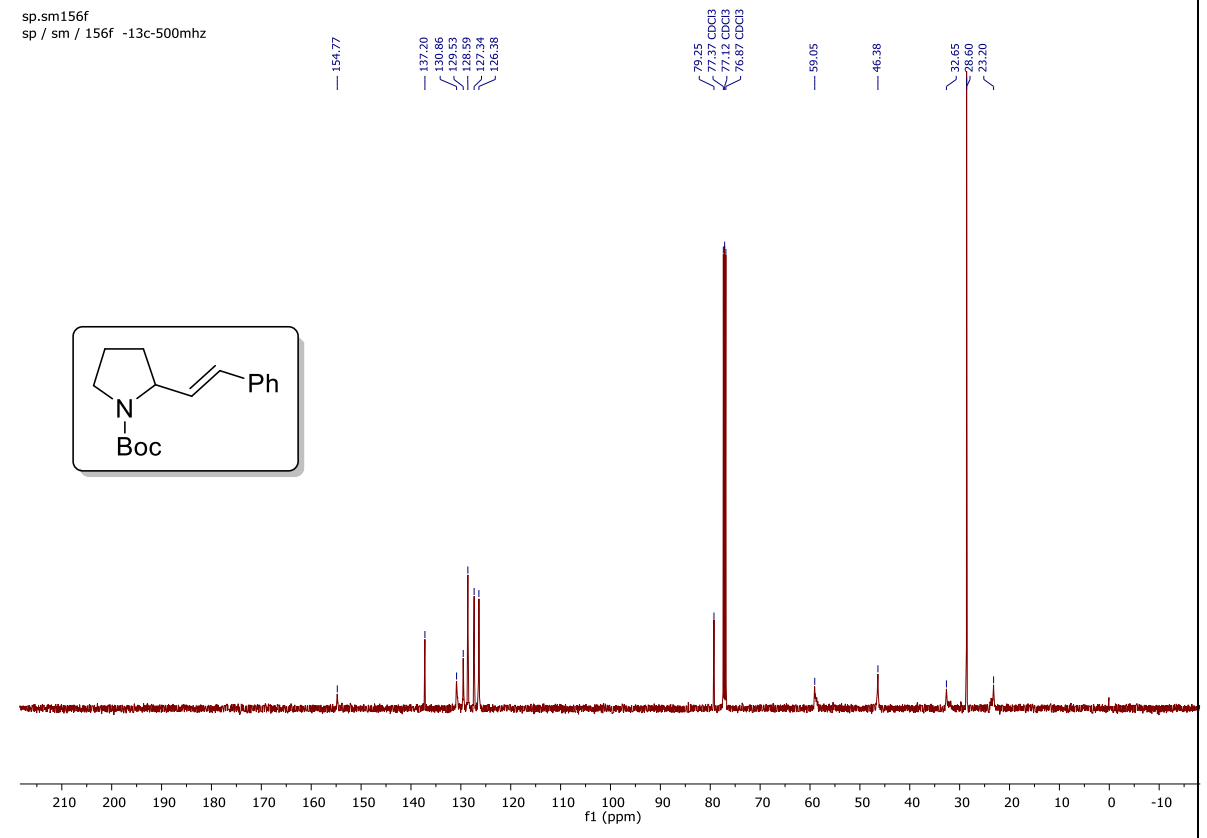

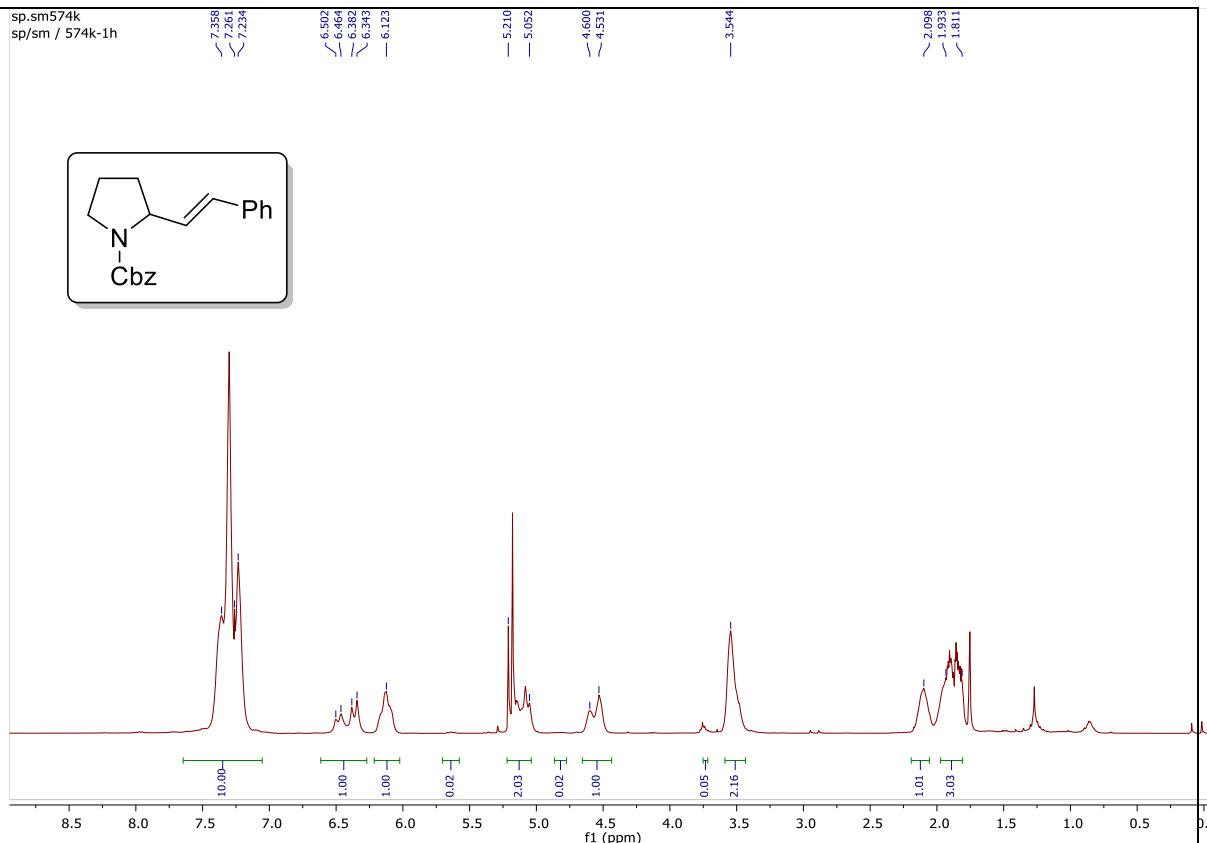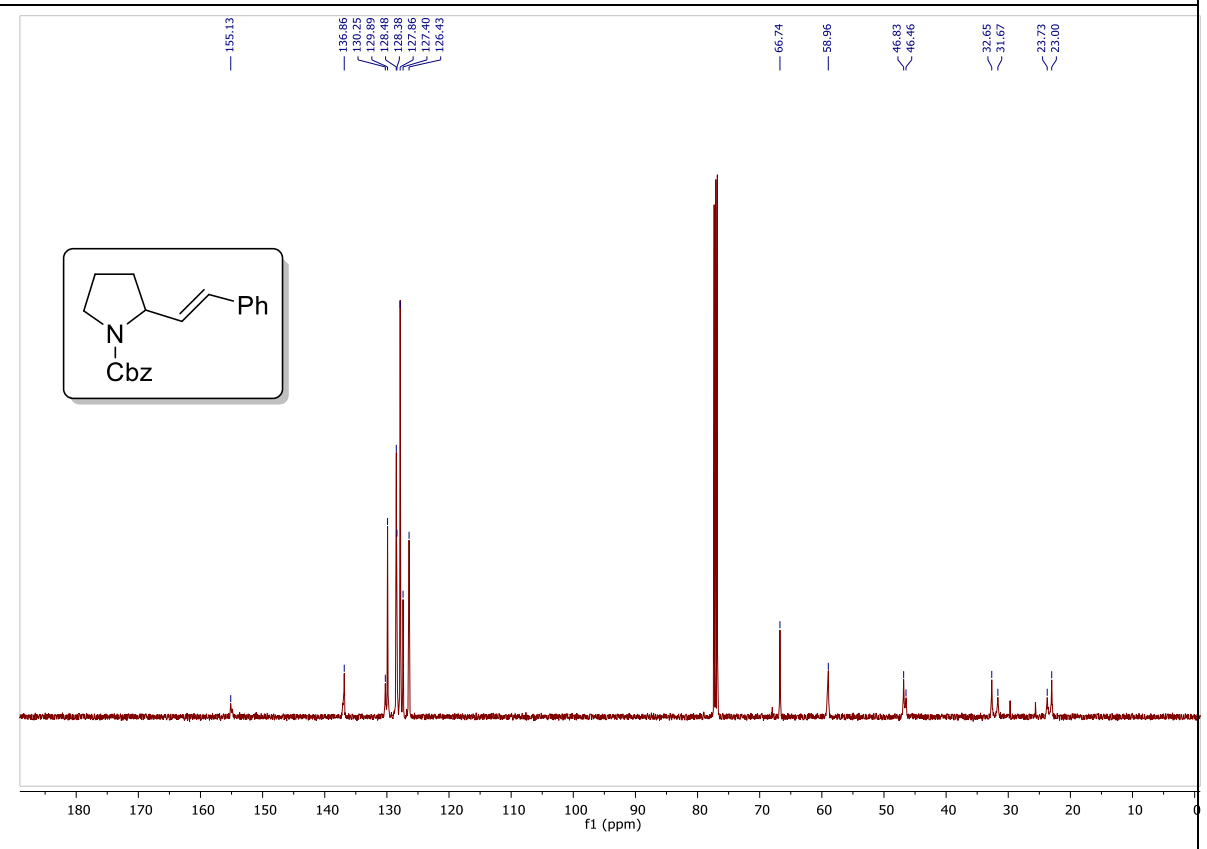

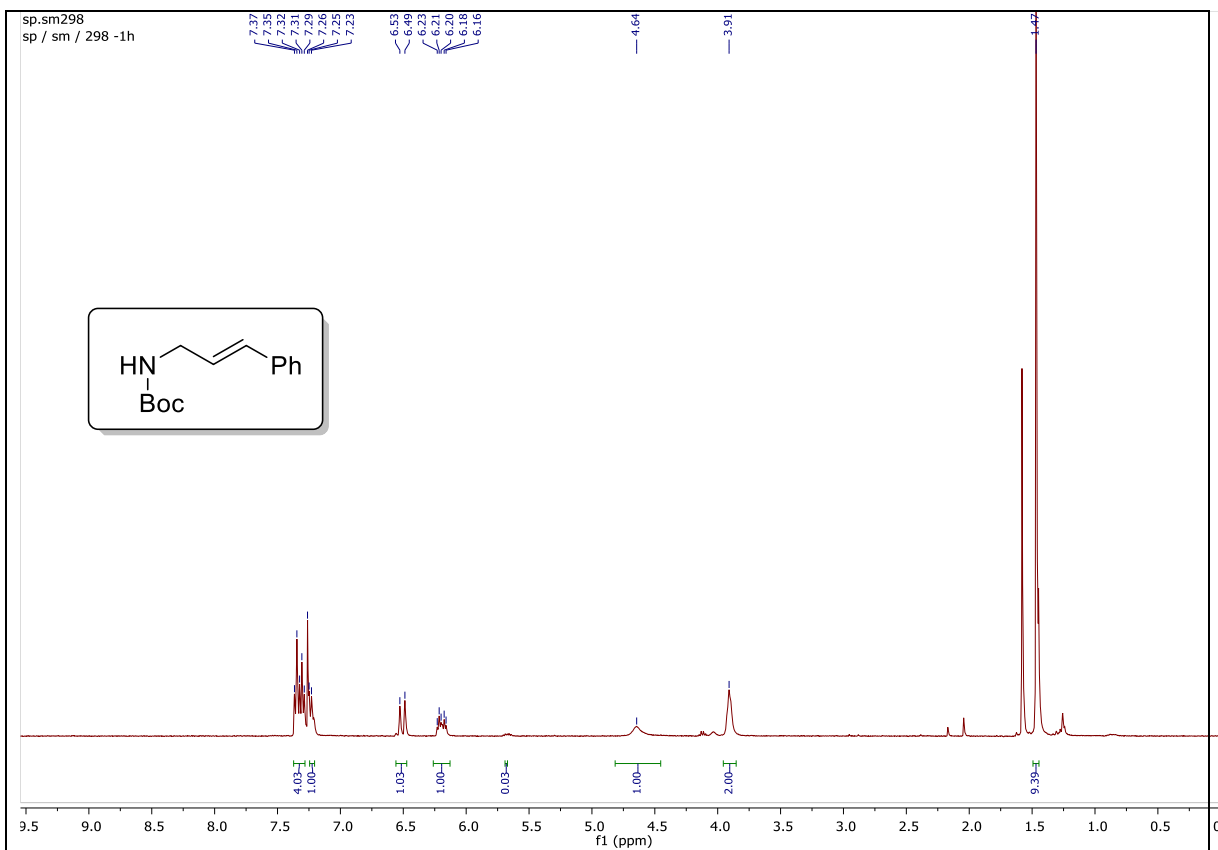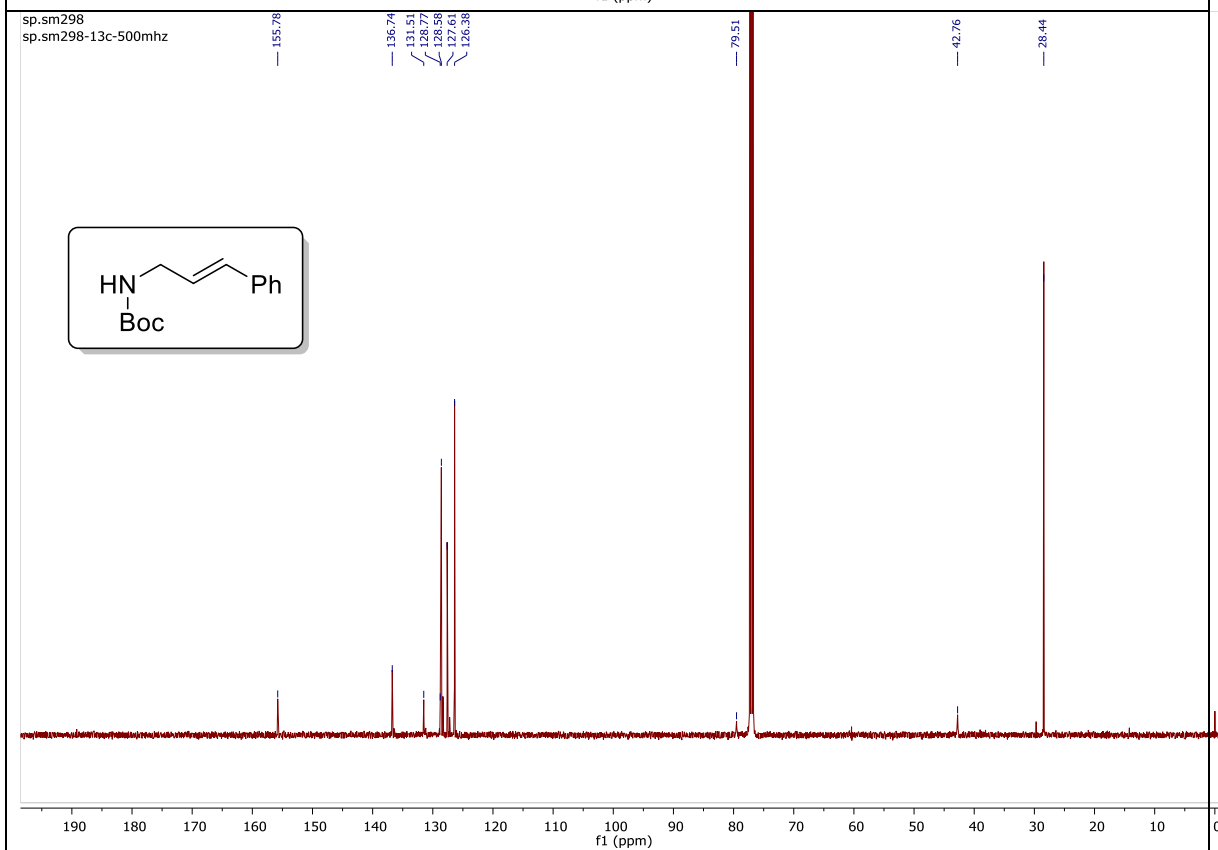

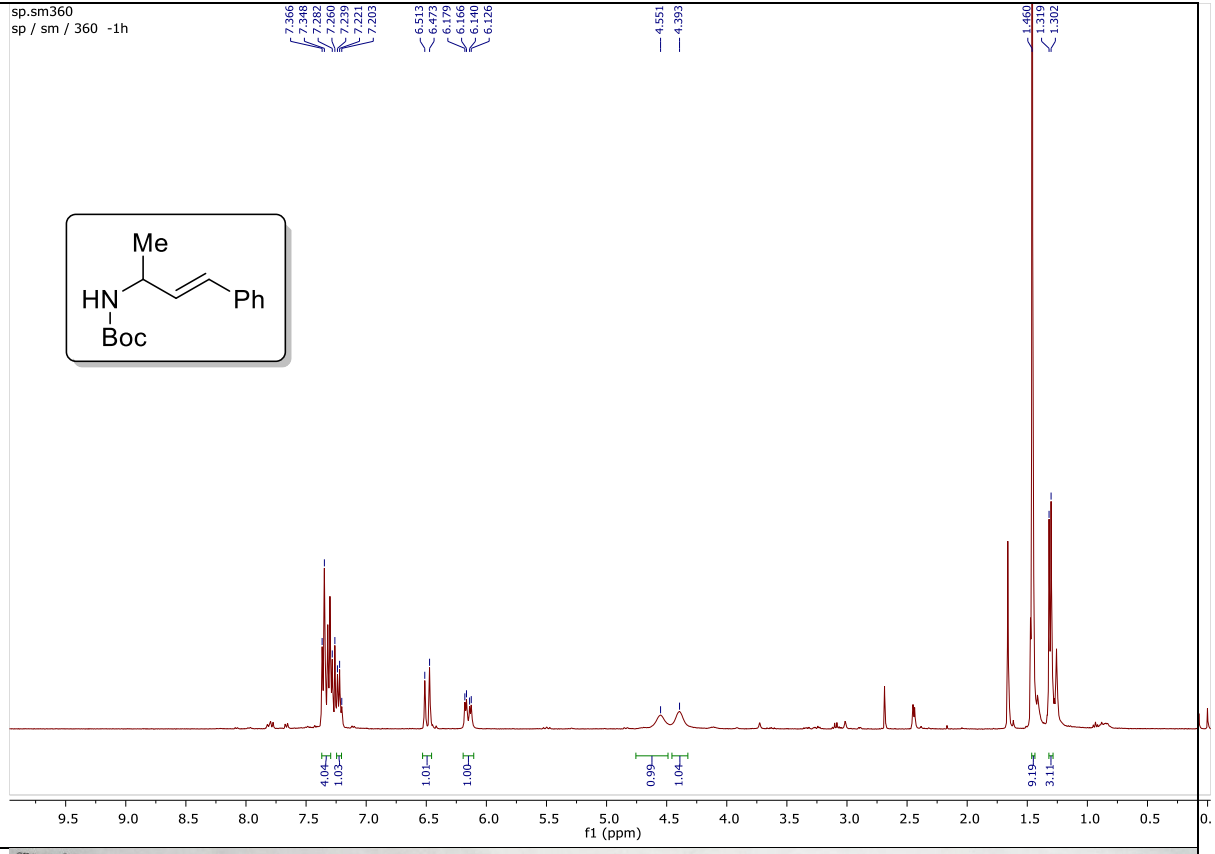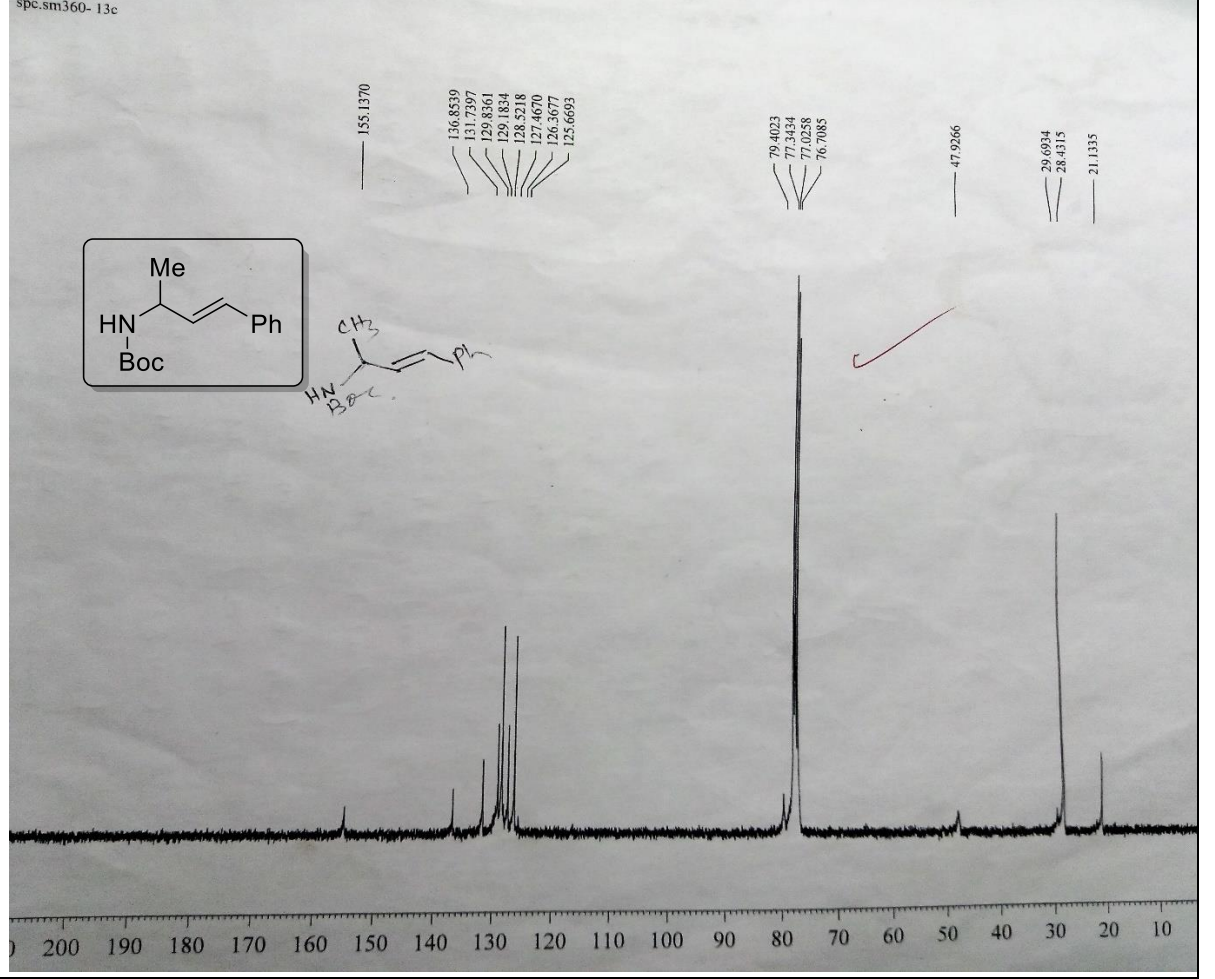

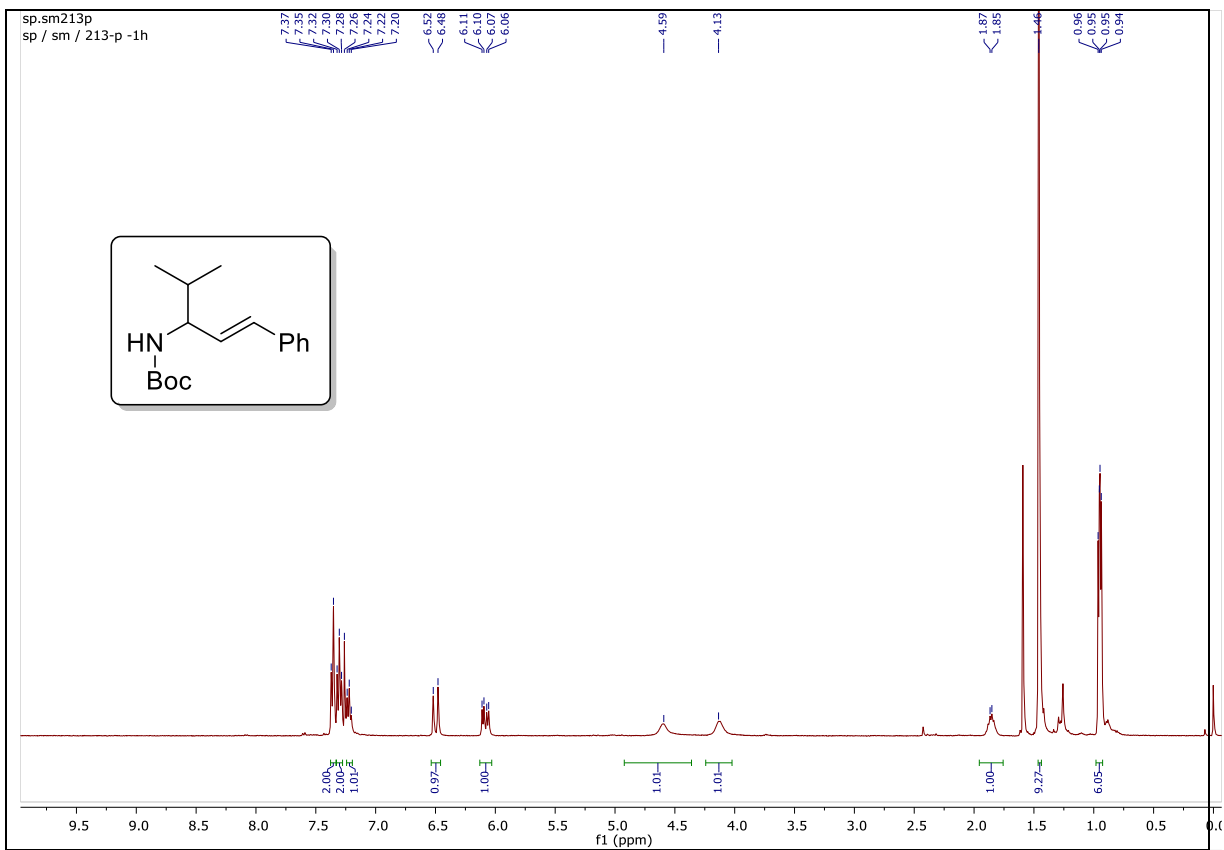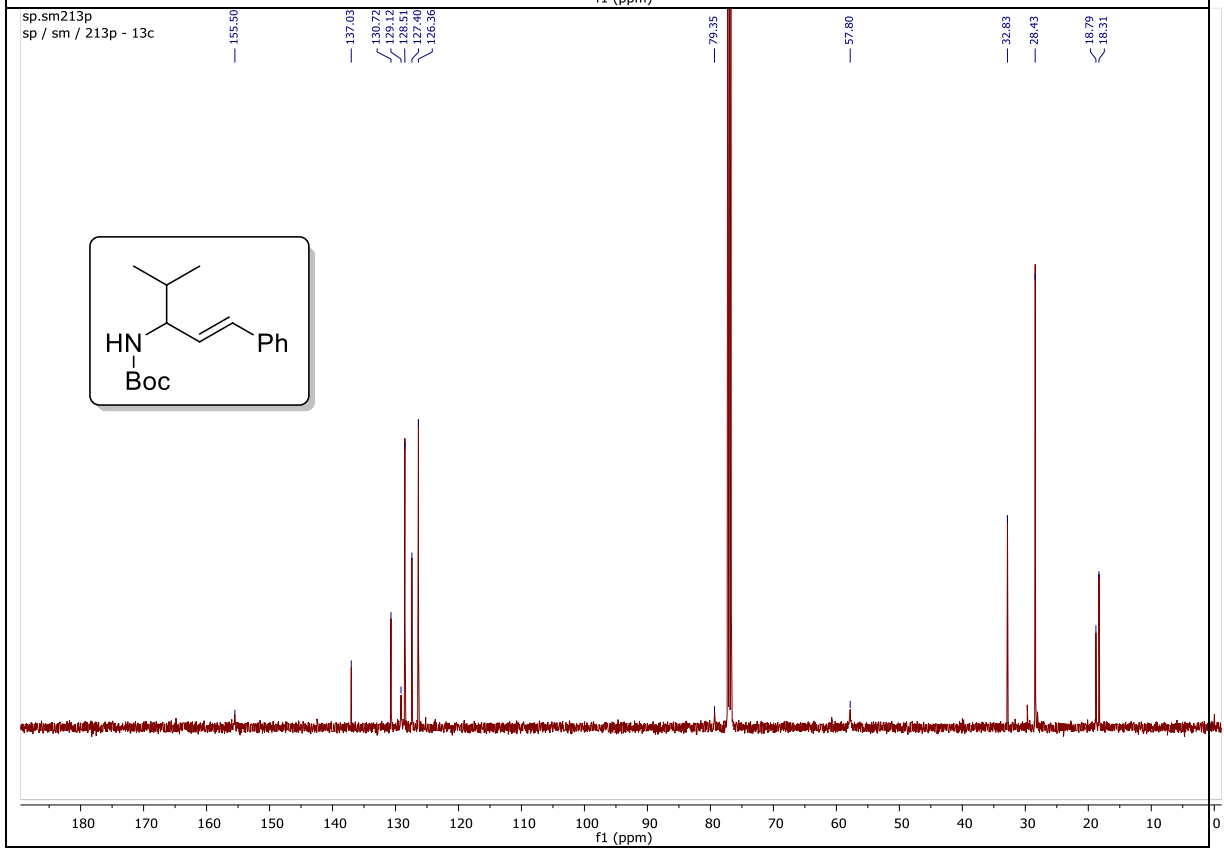

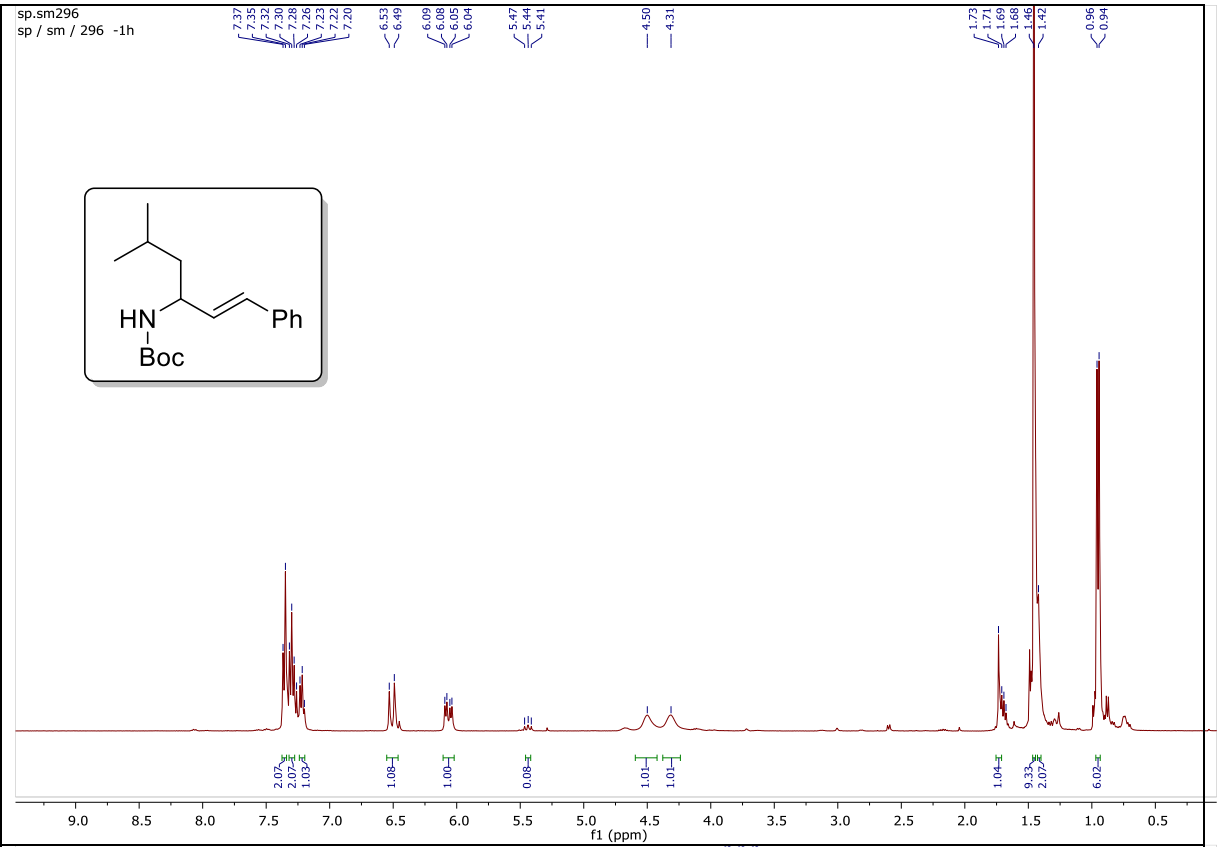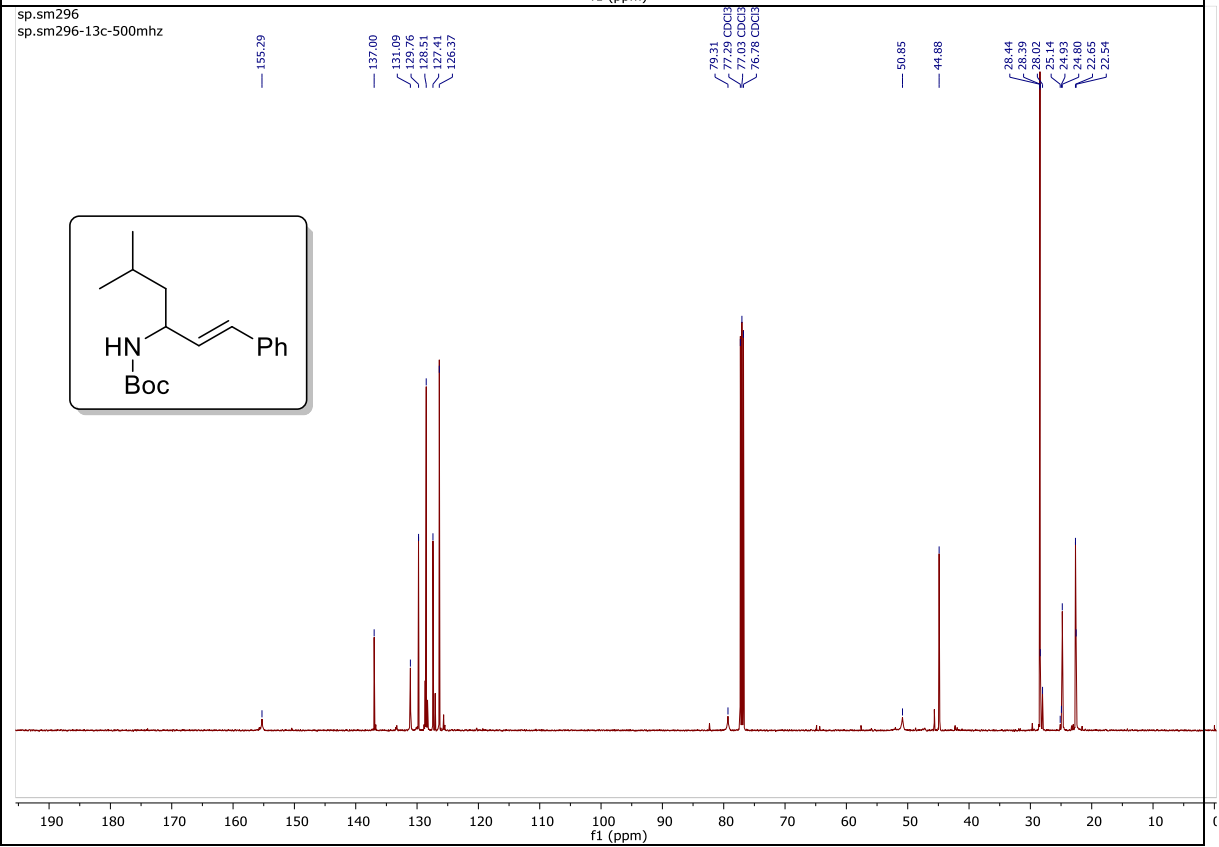

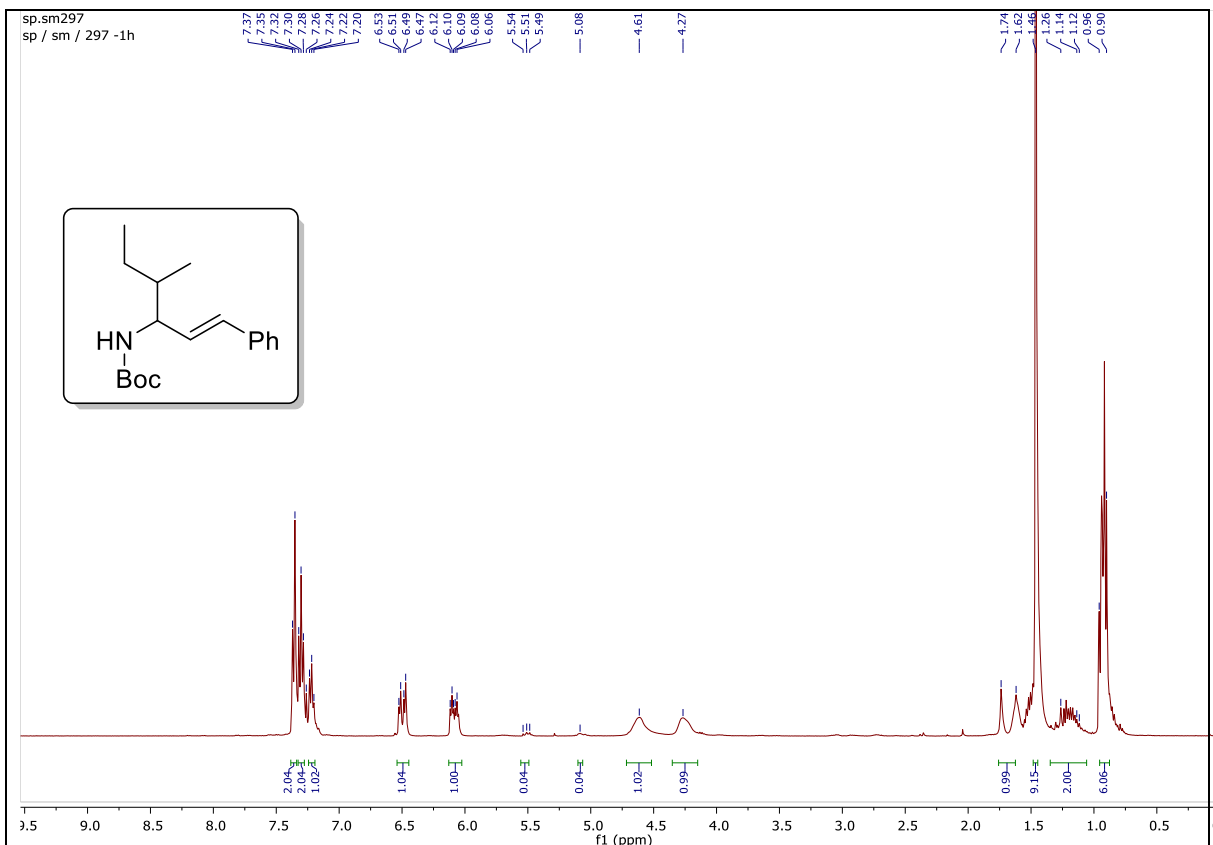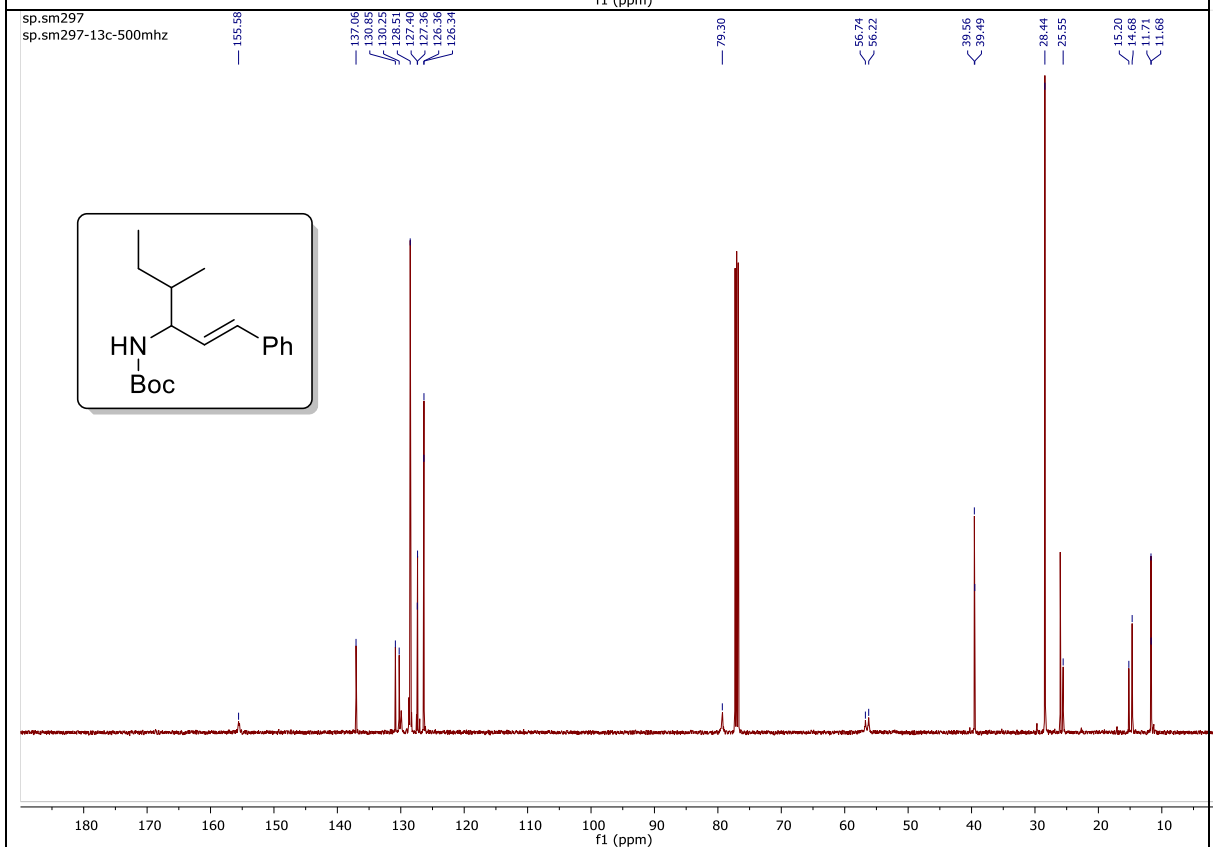



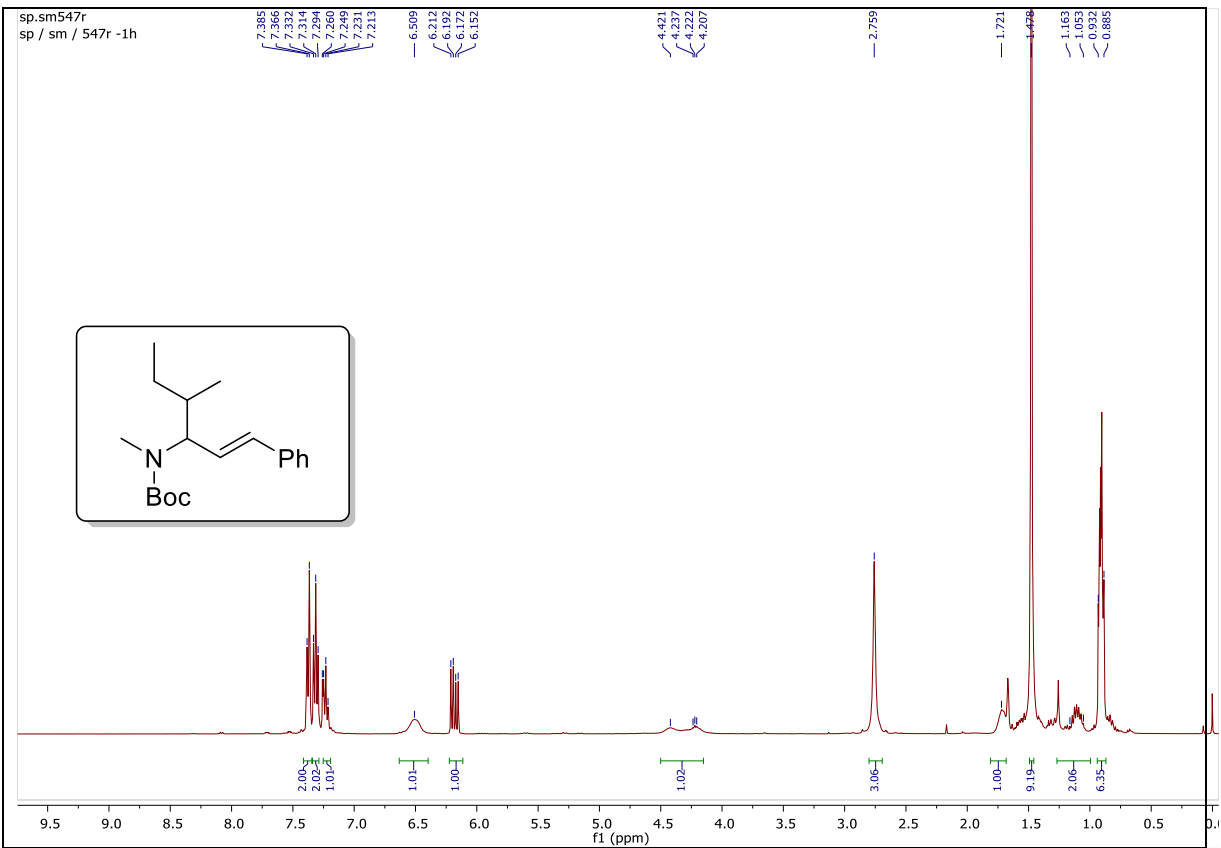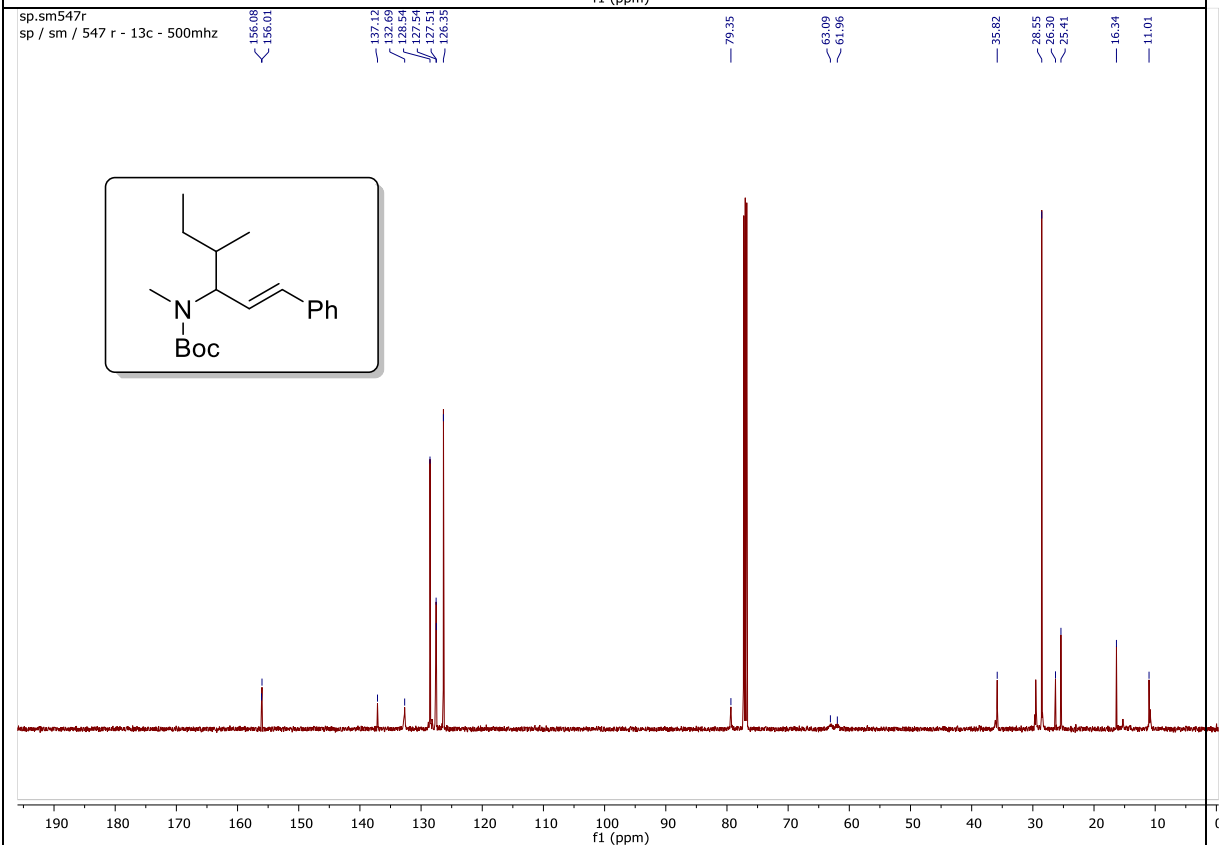

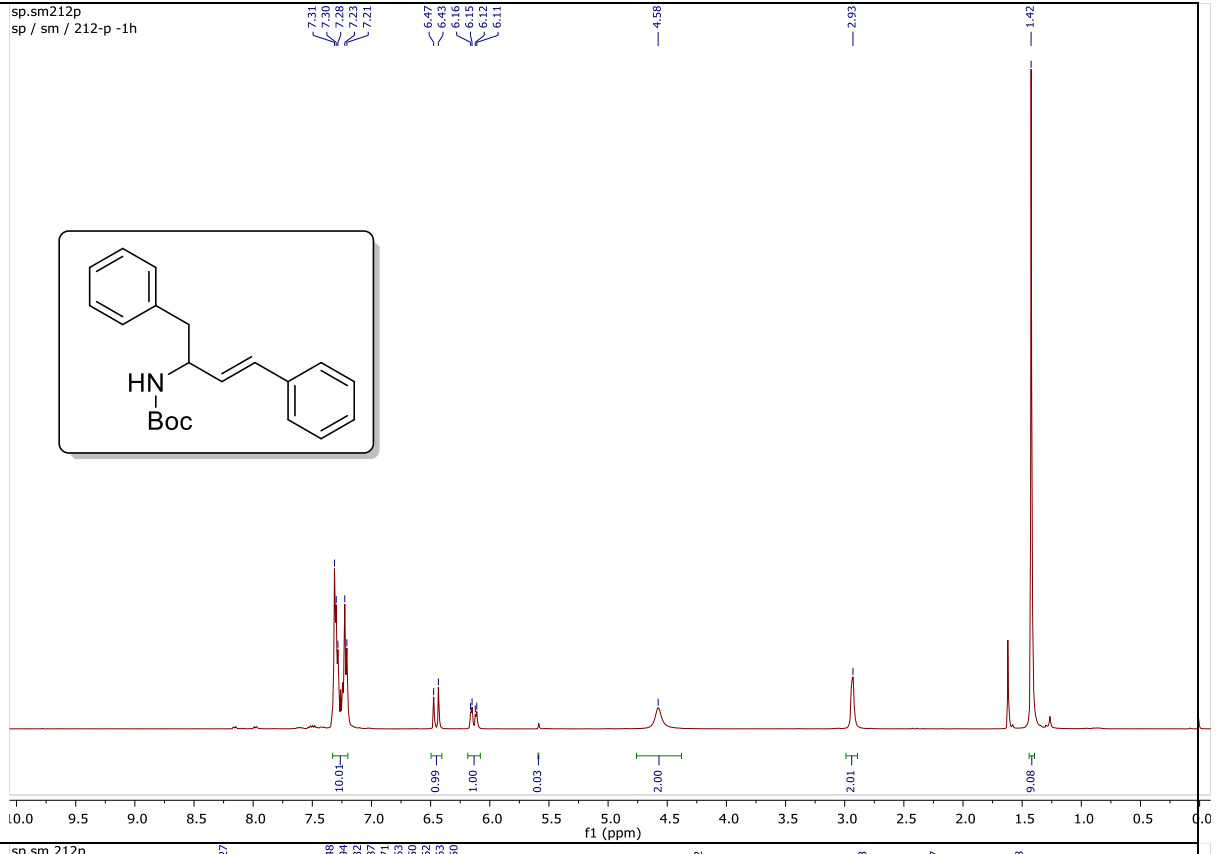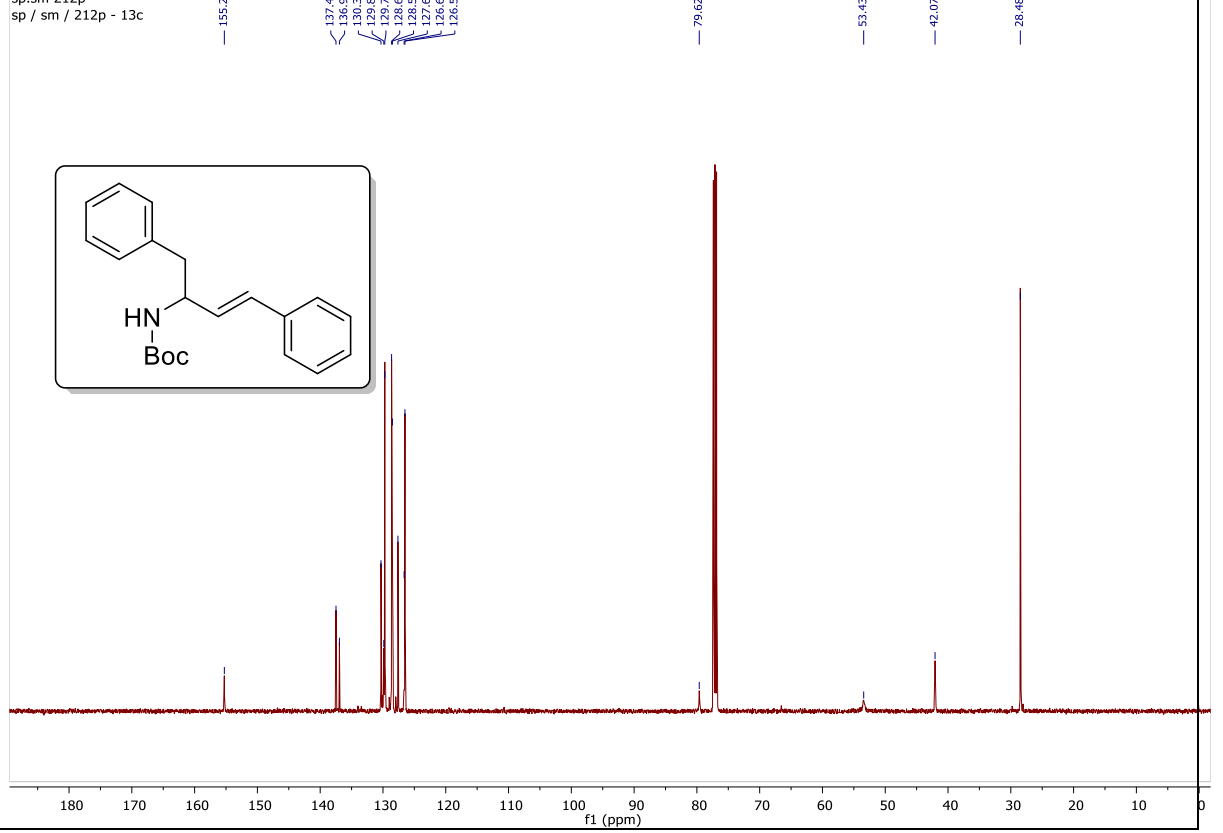

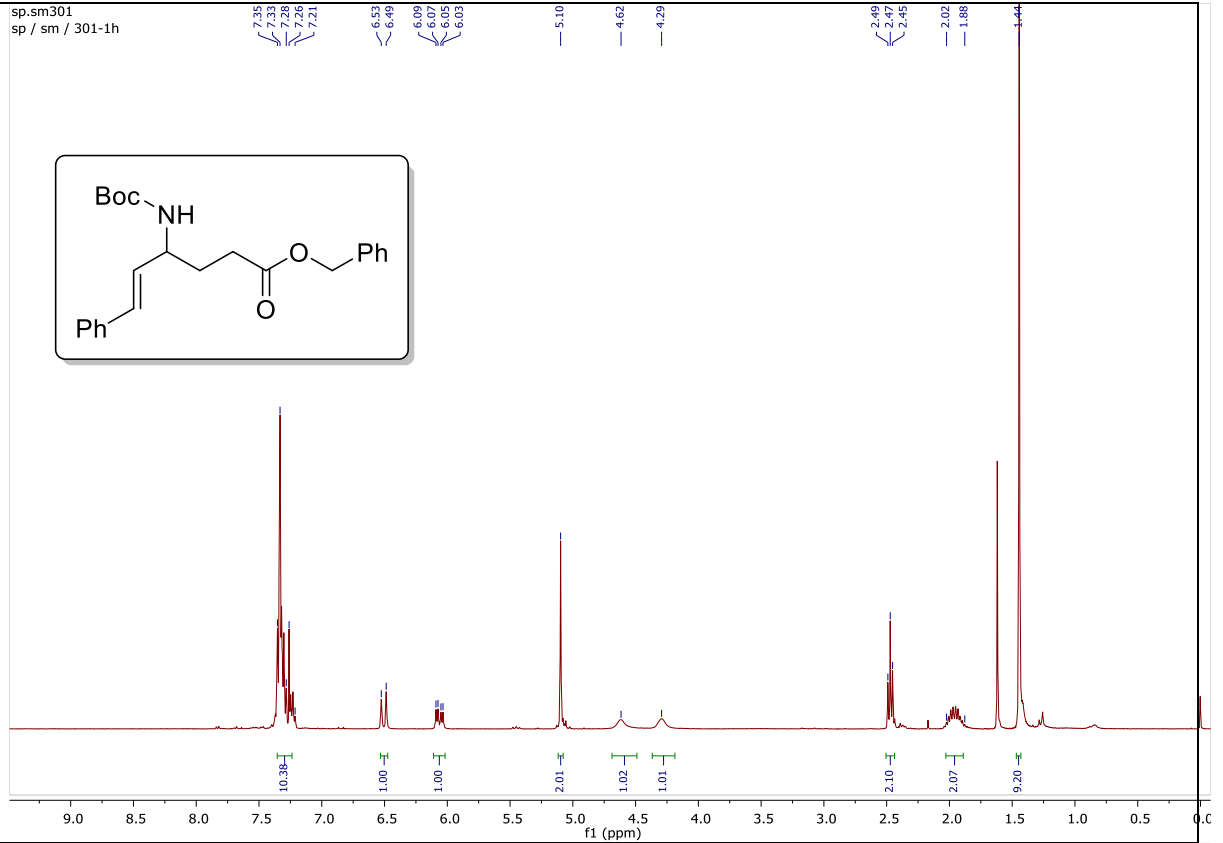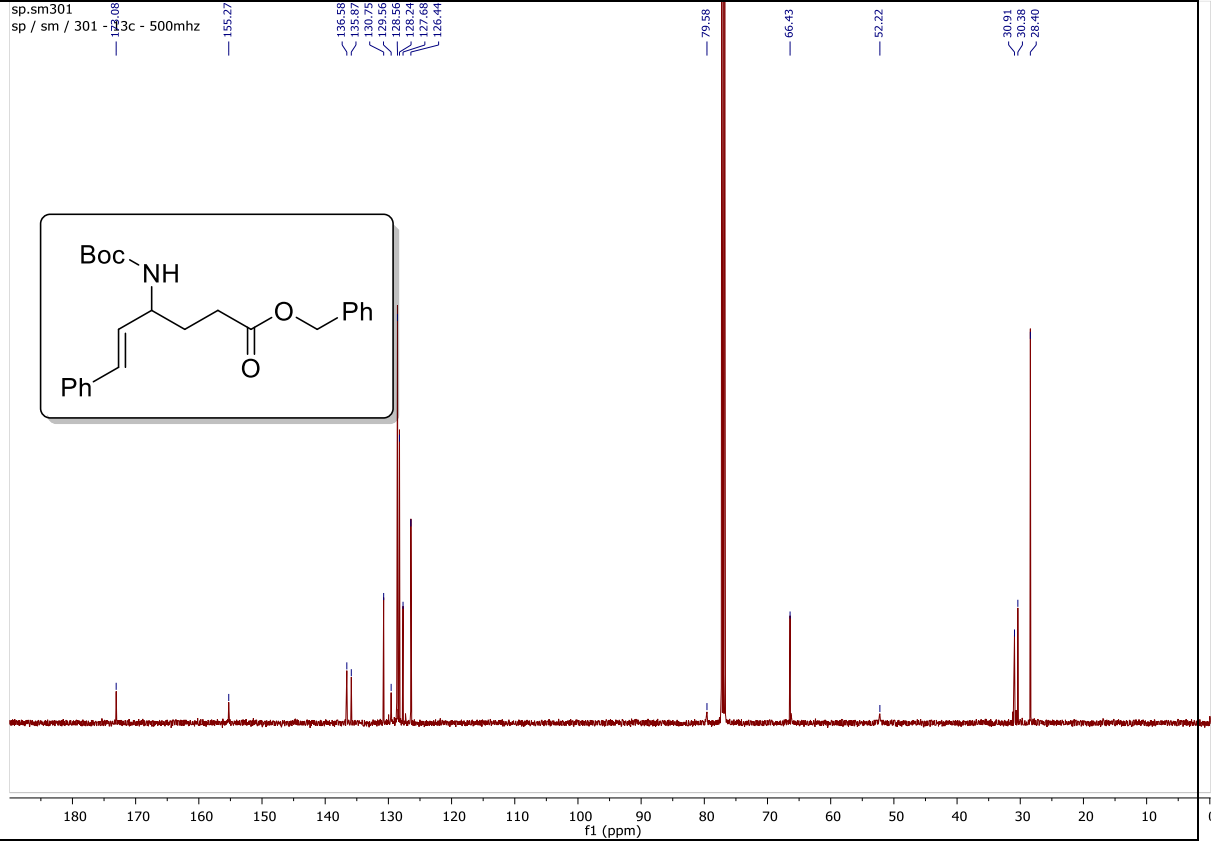

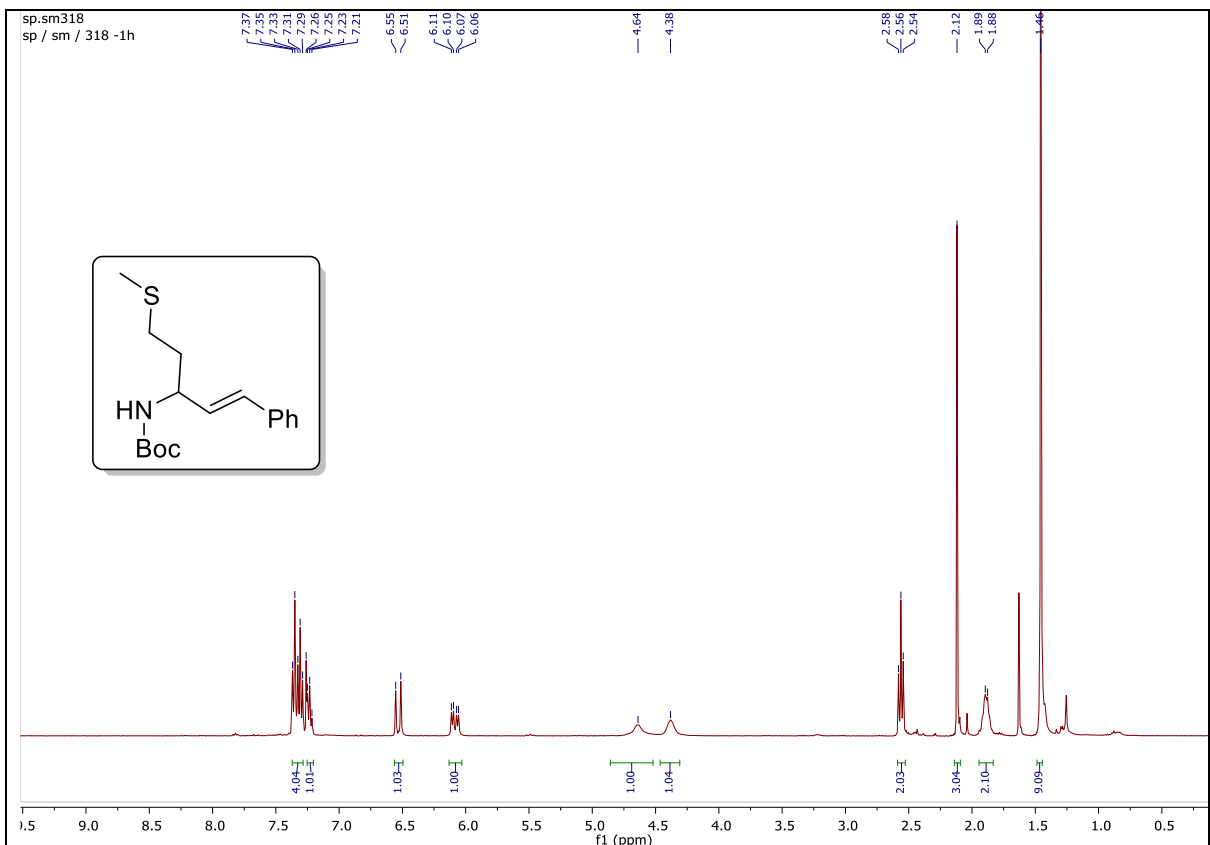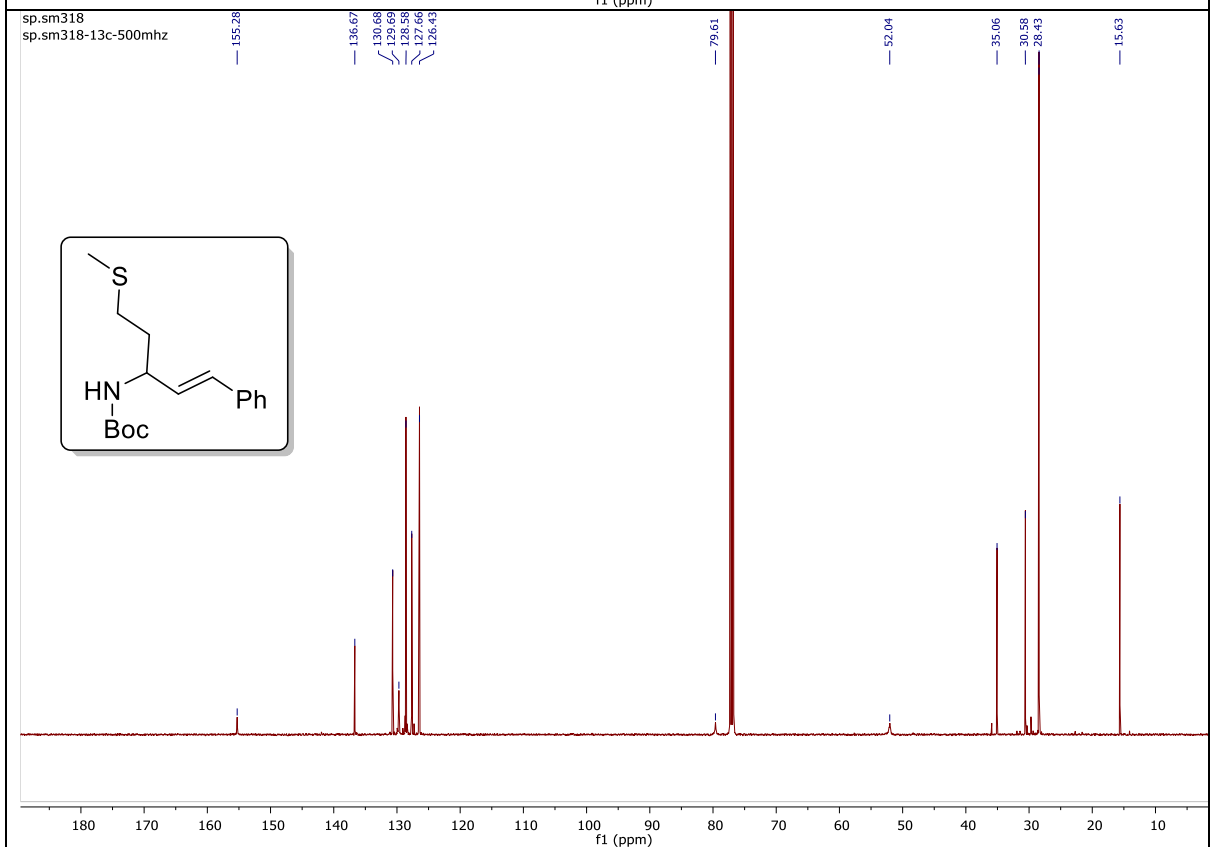

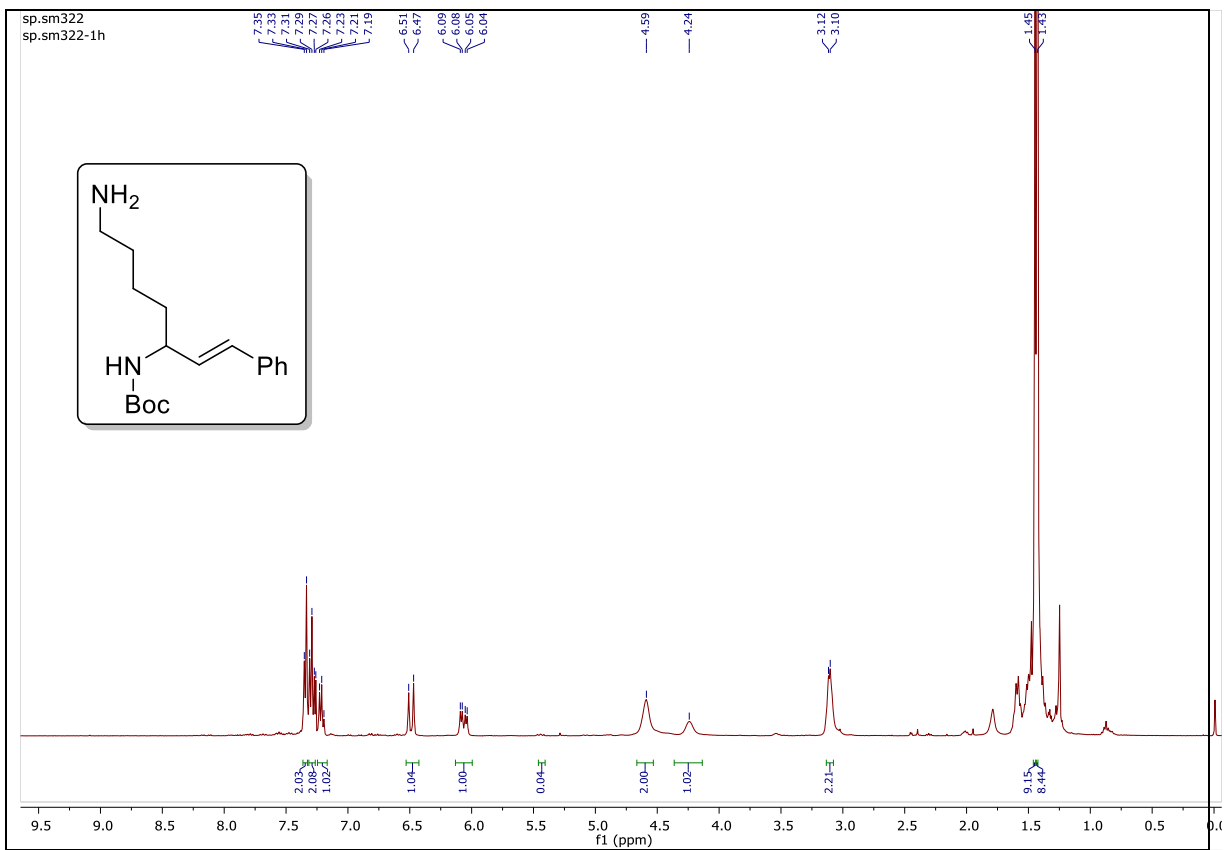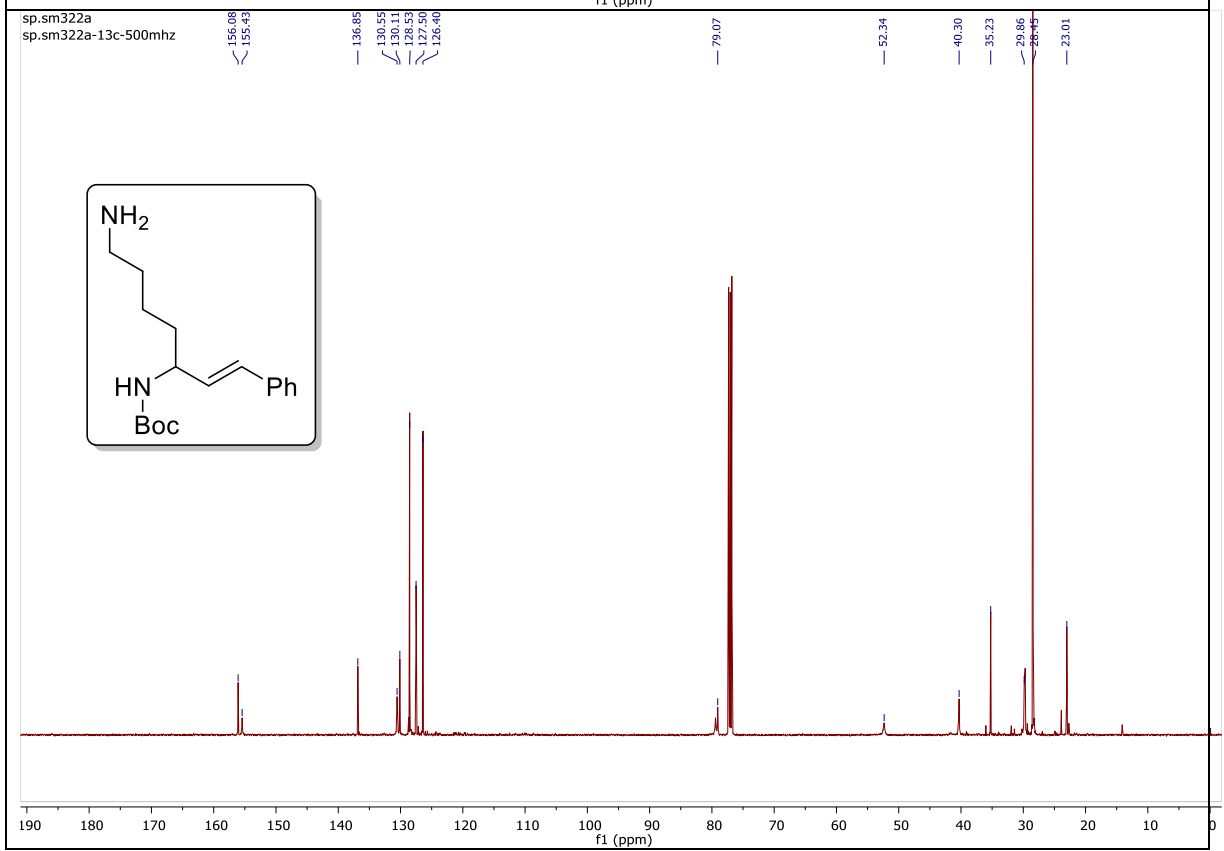

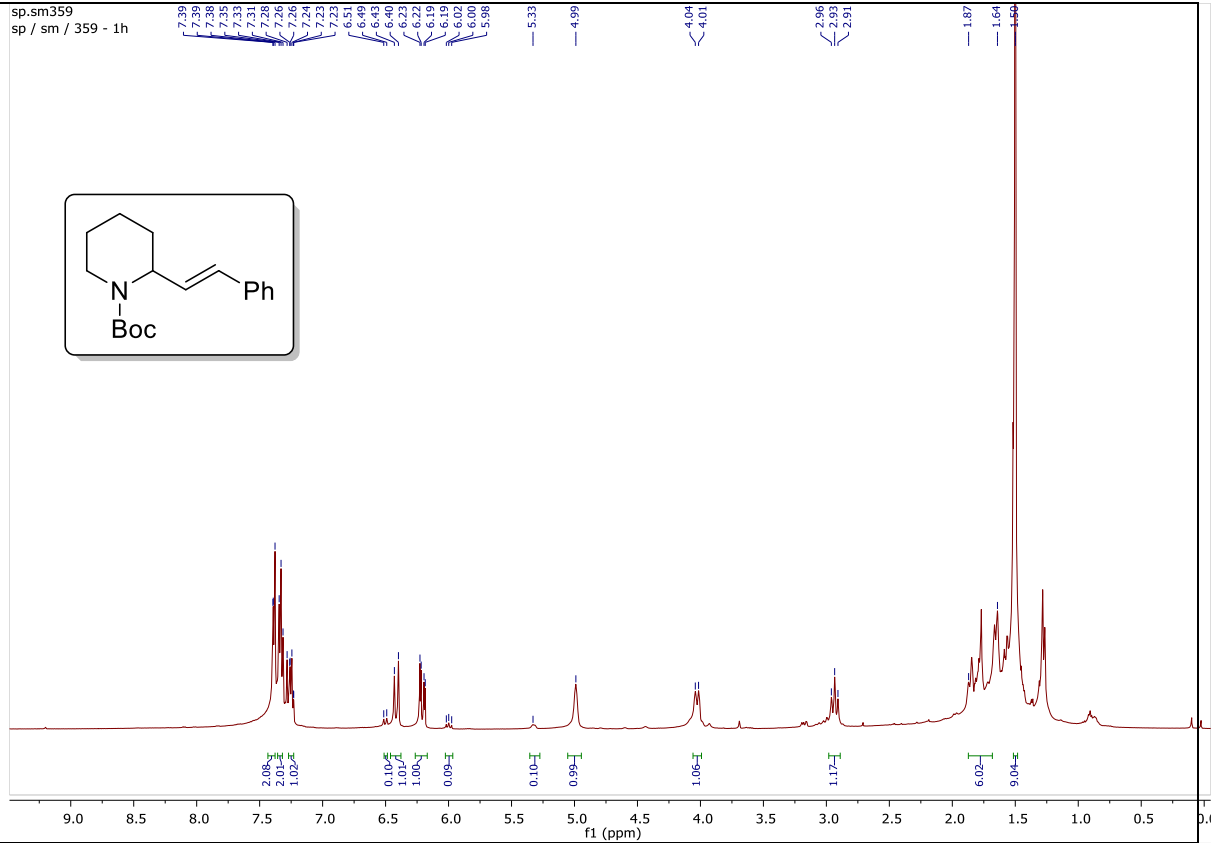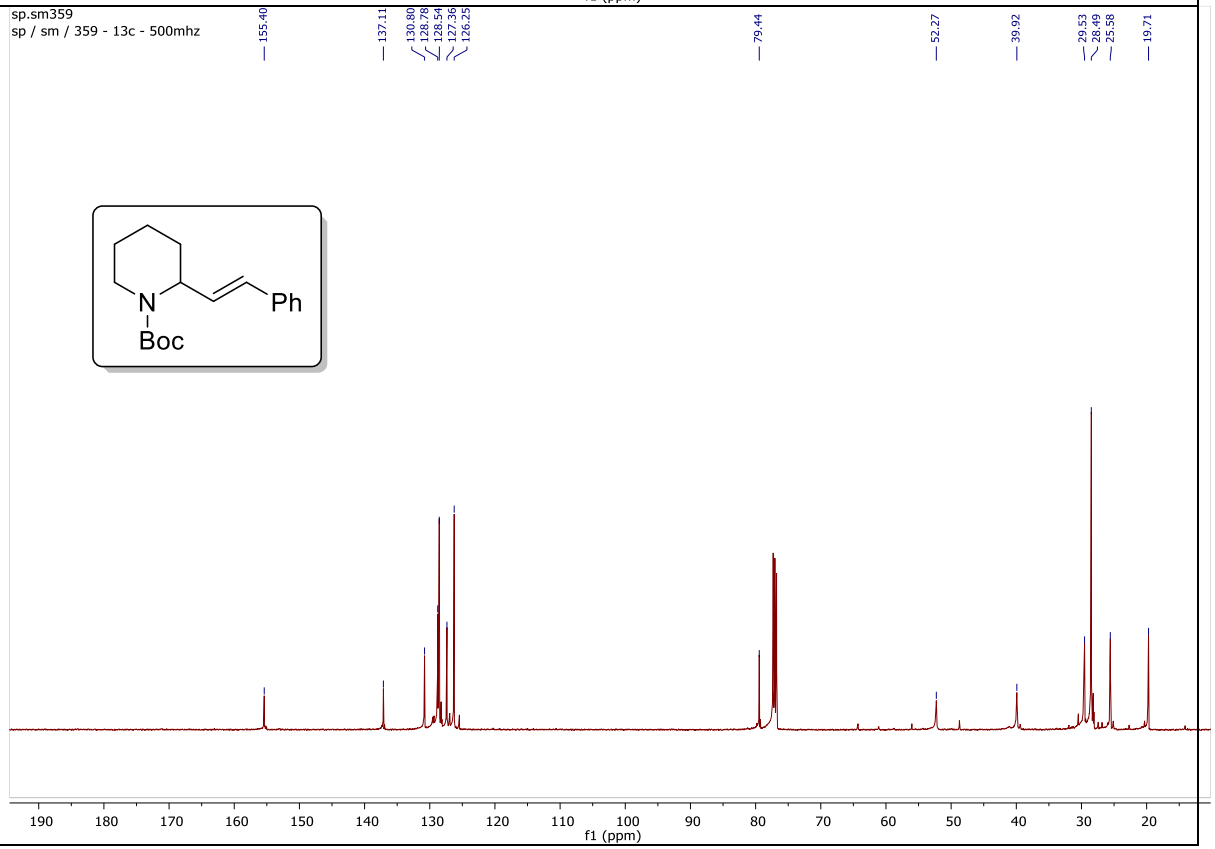

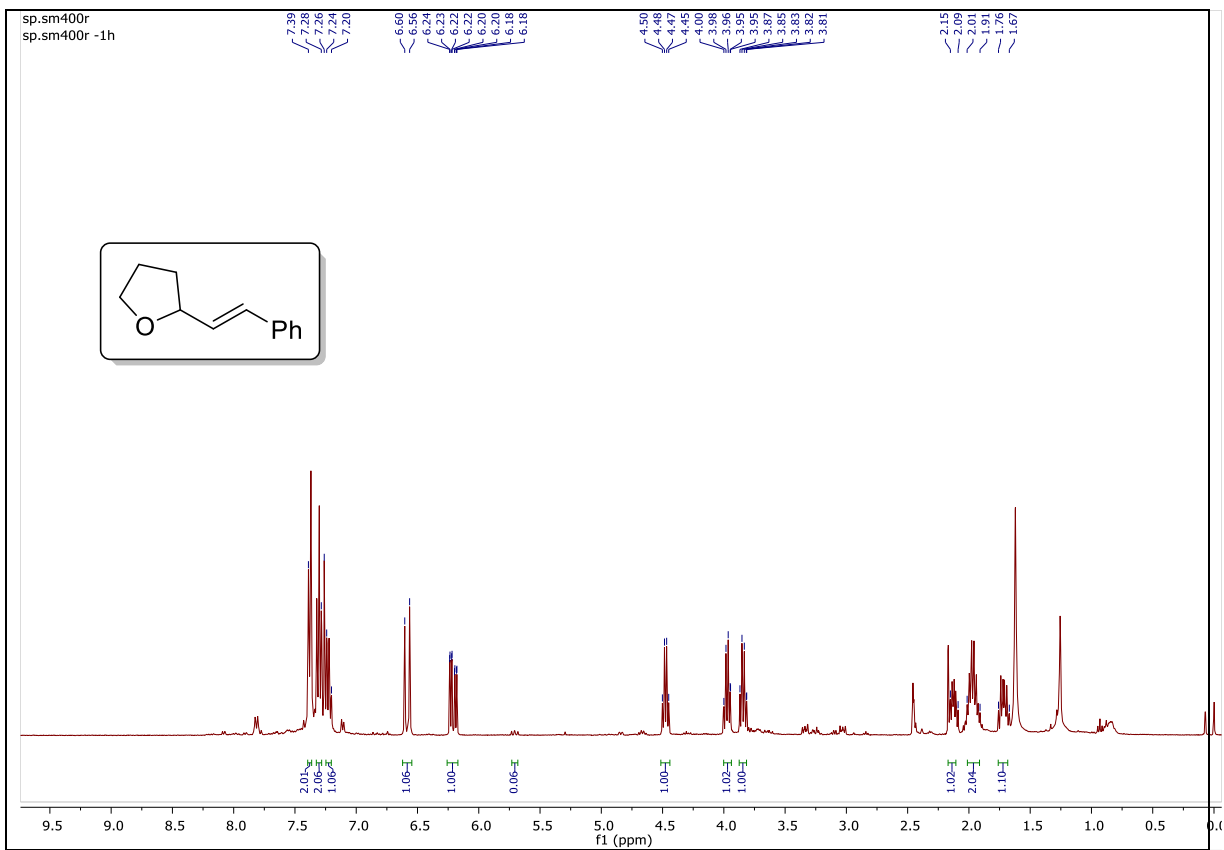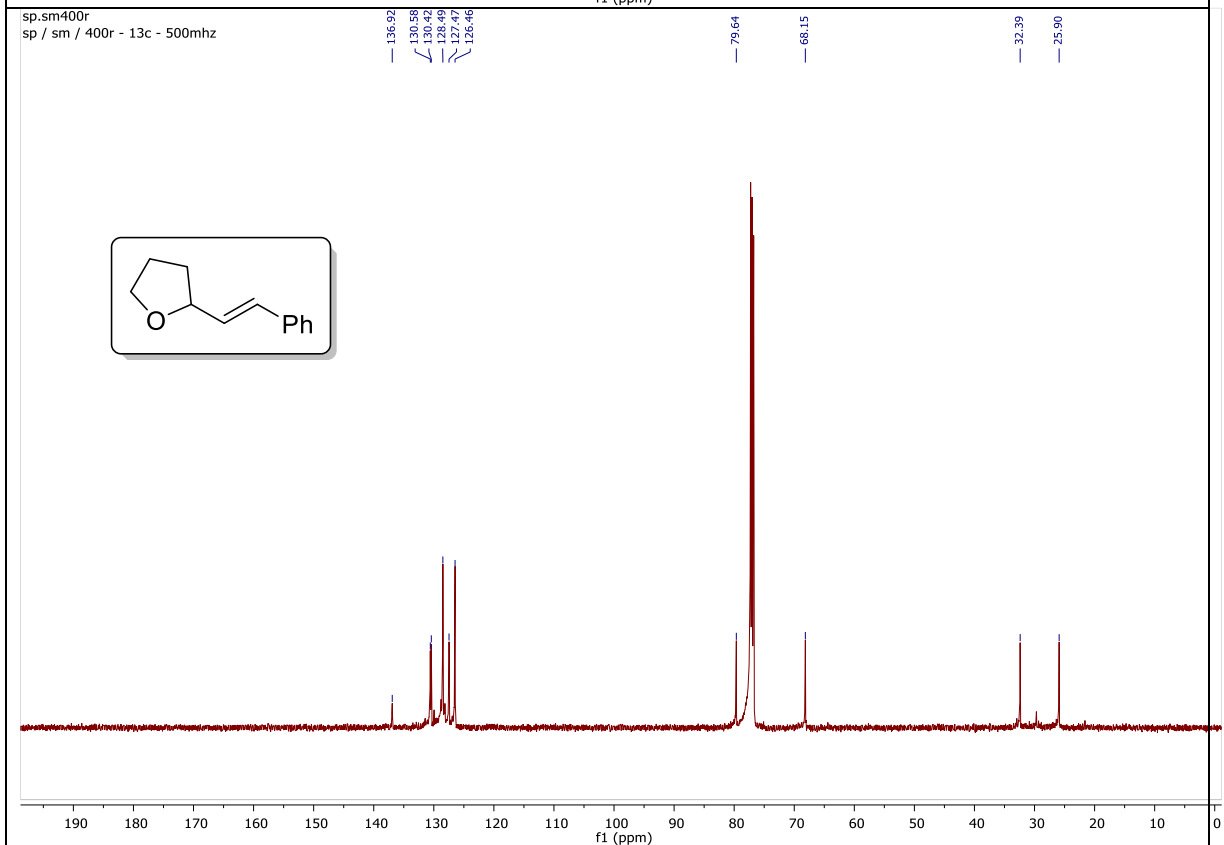

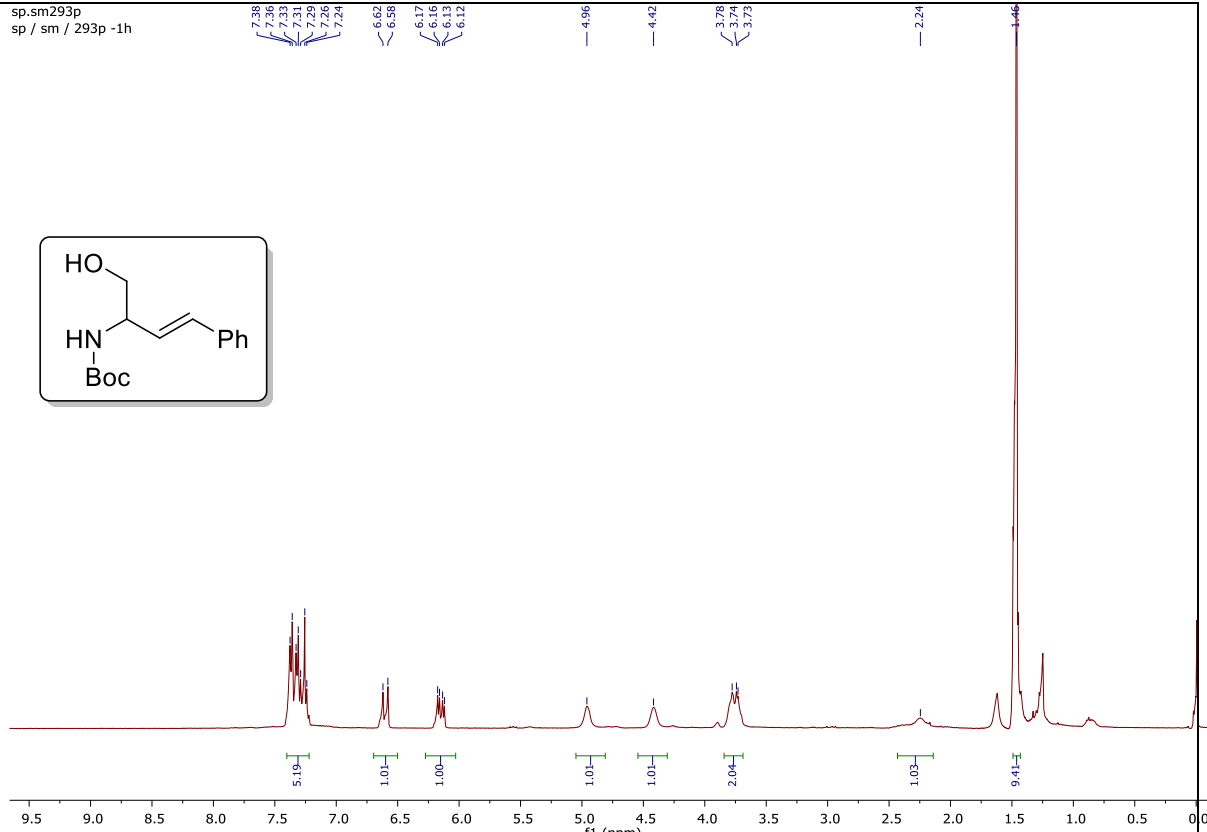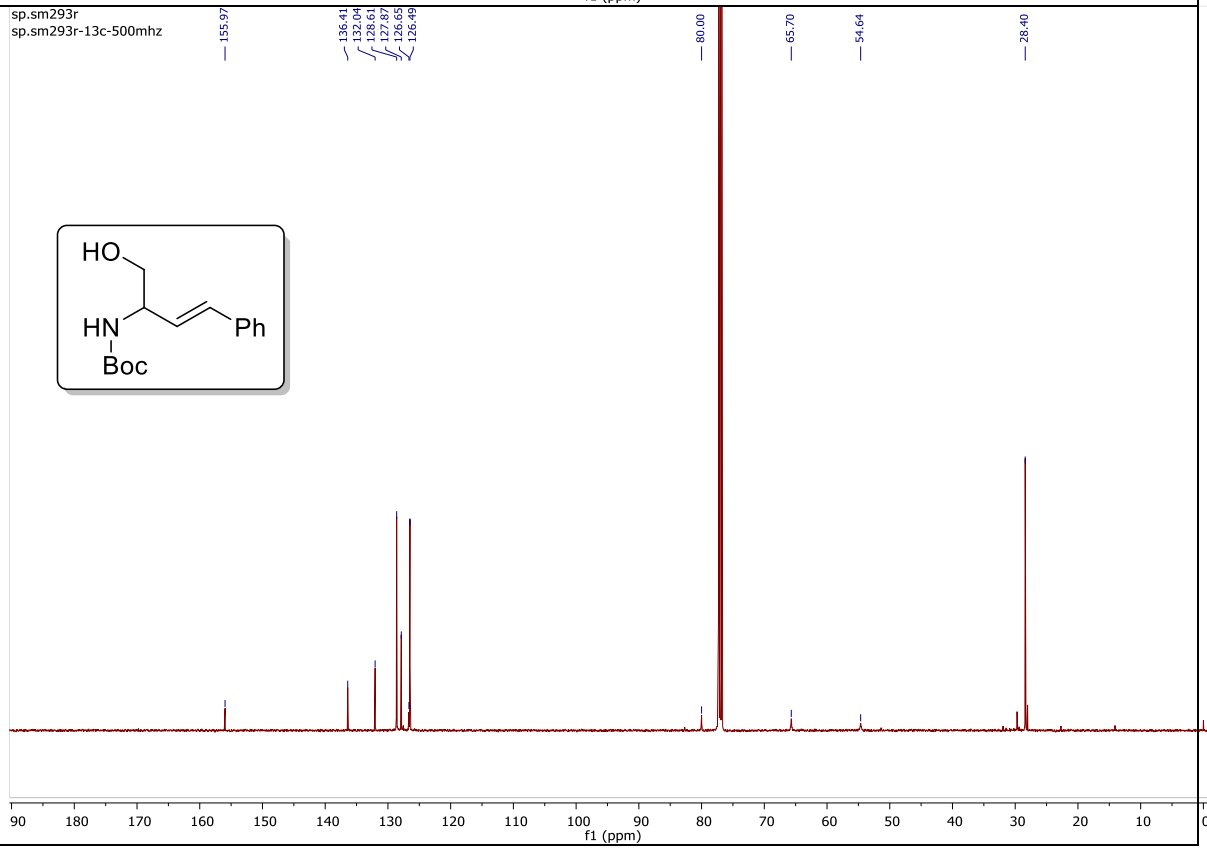



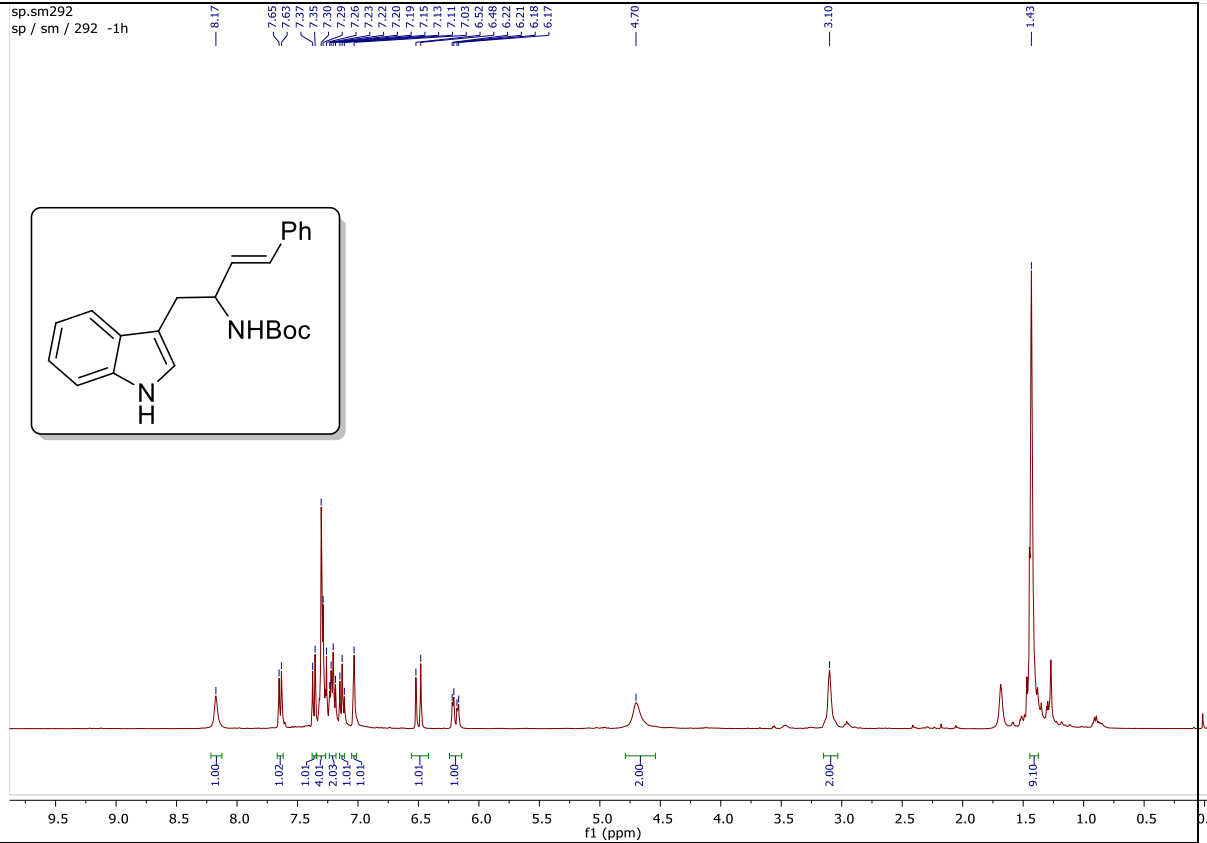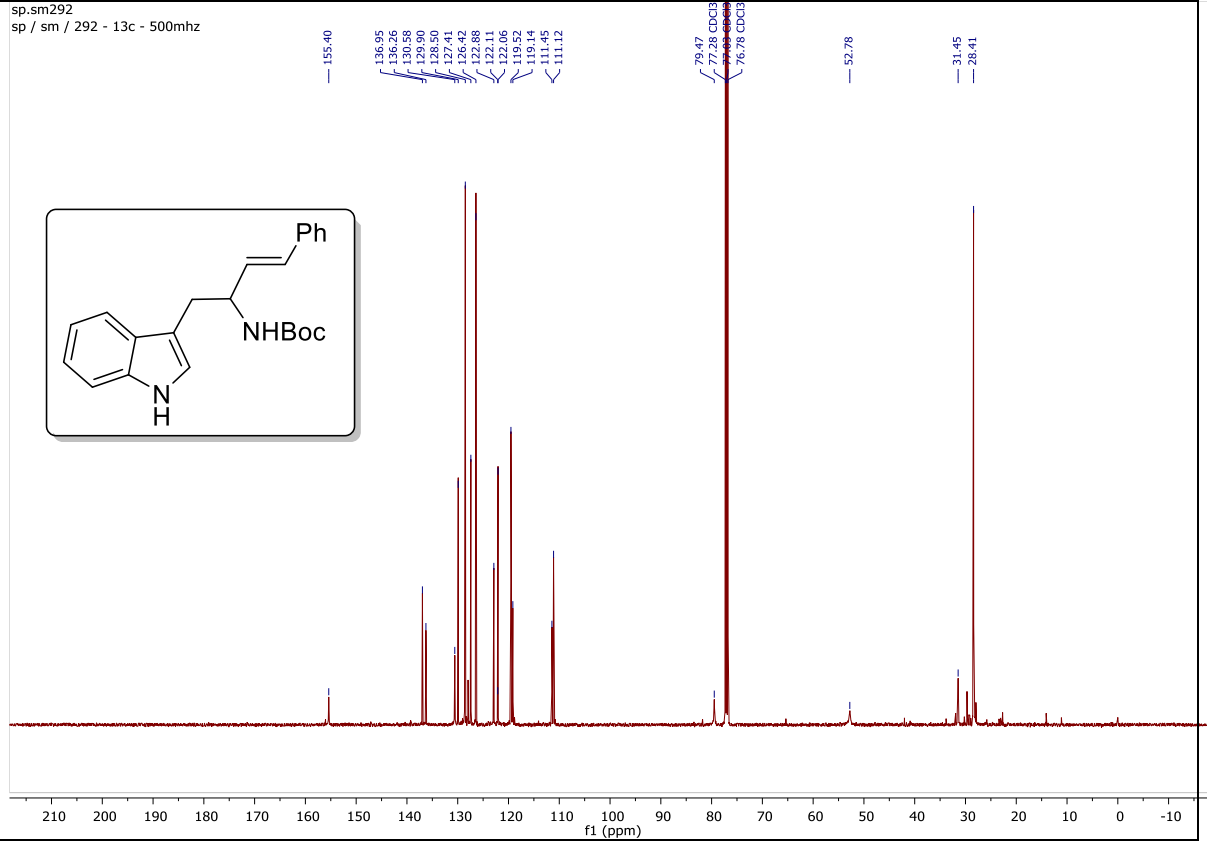

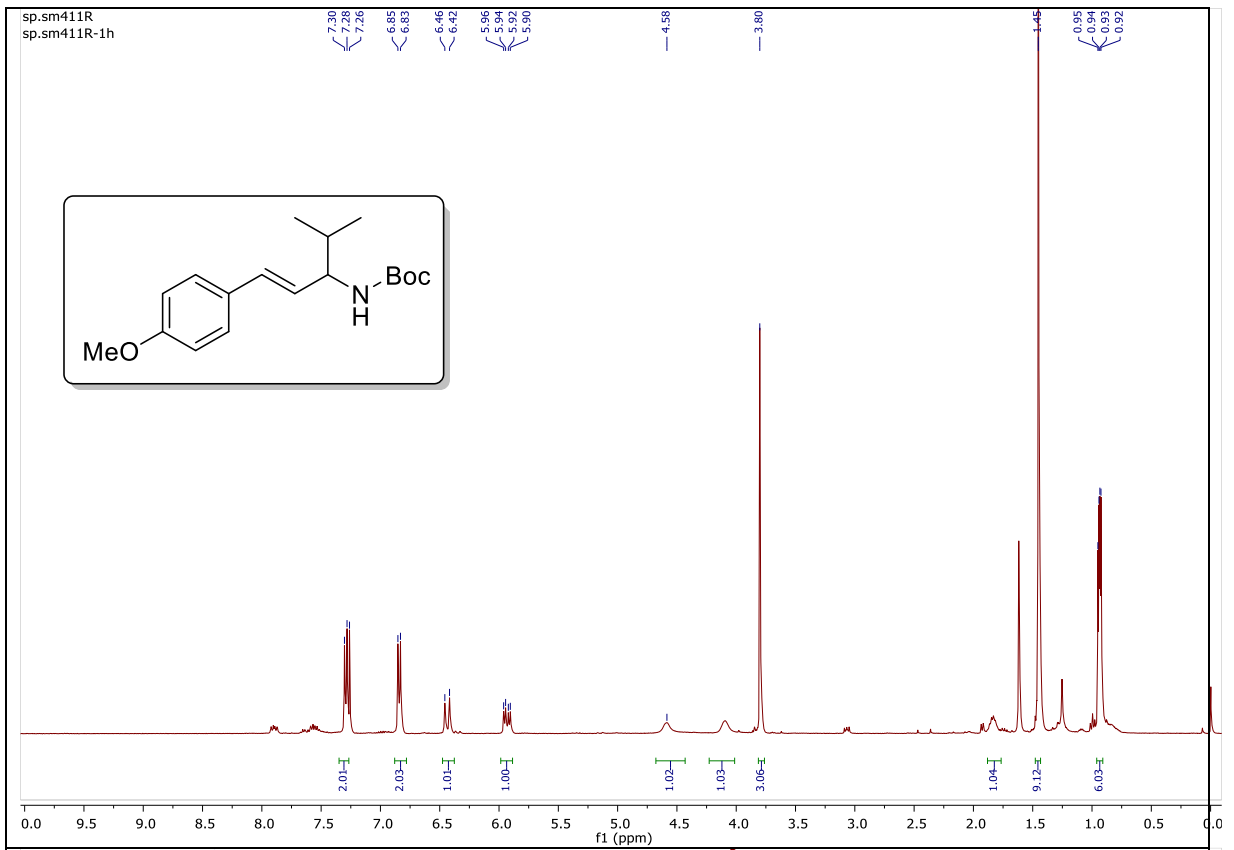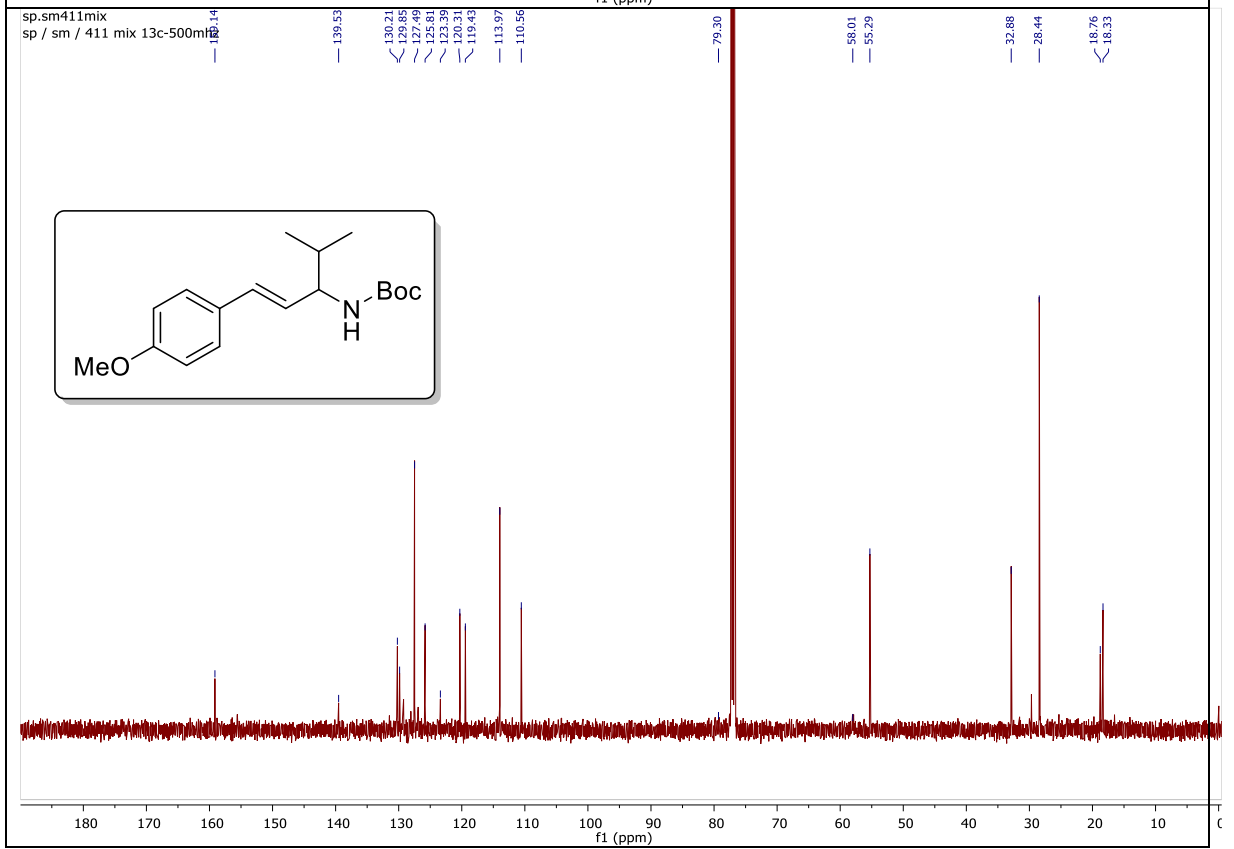

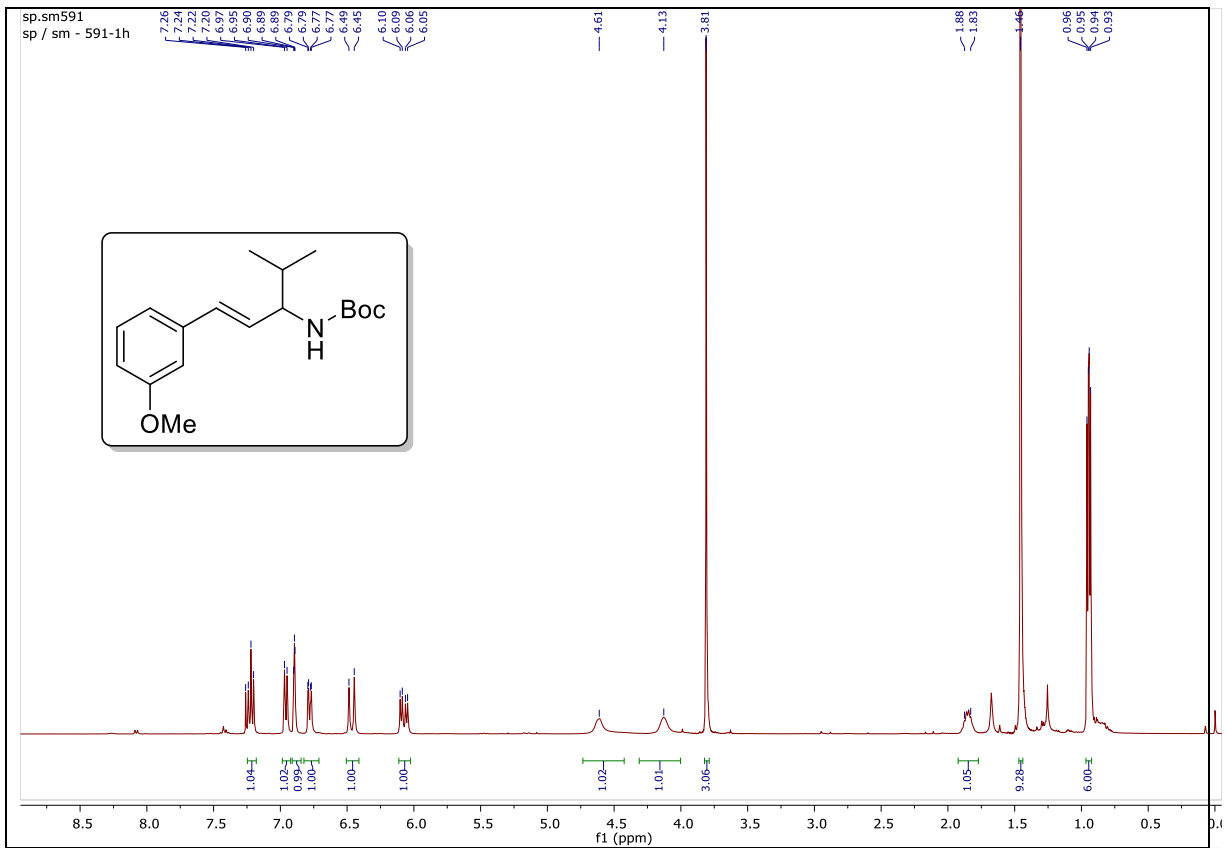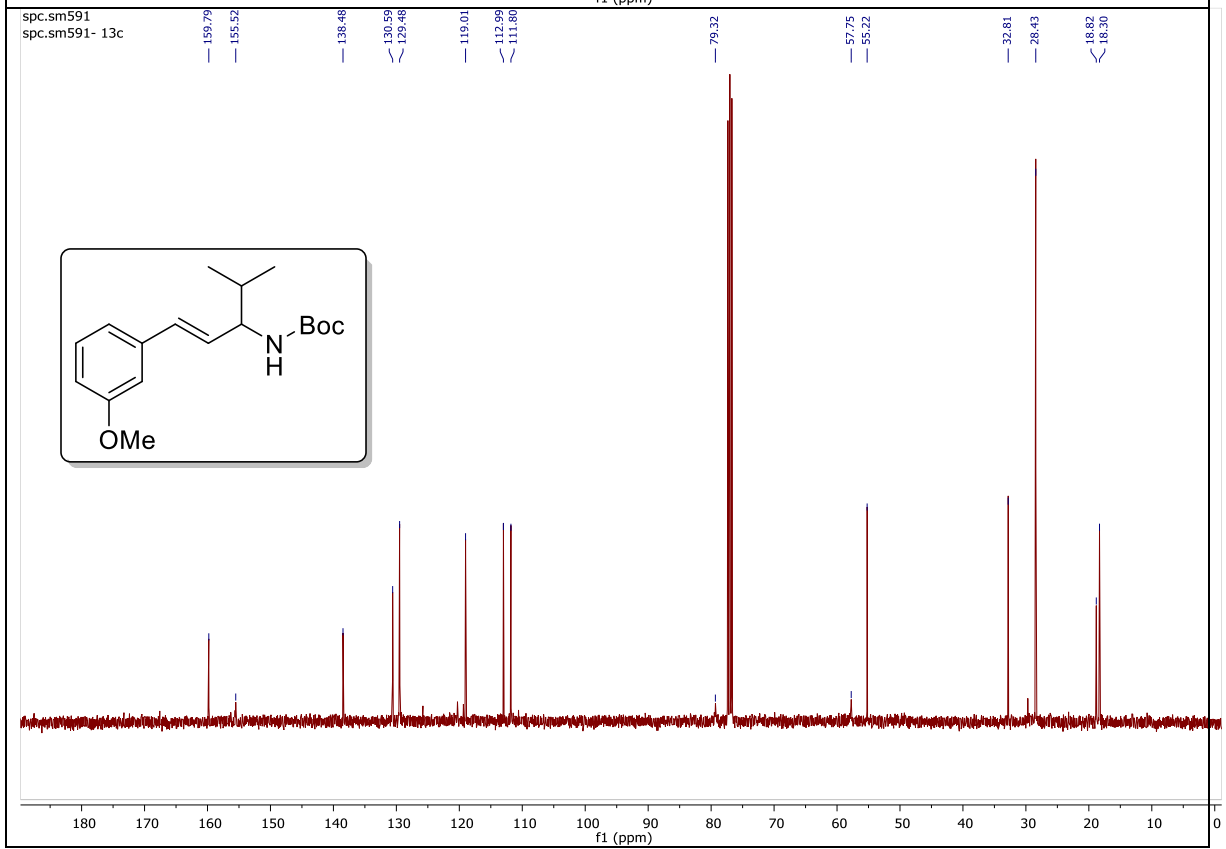

sp.sm586  
sp.sm586 -1h

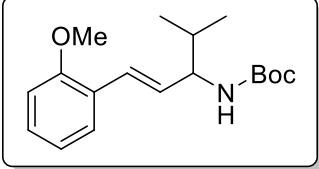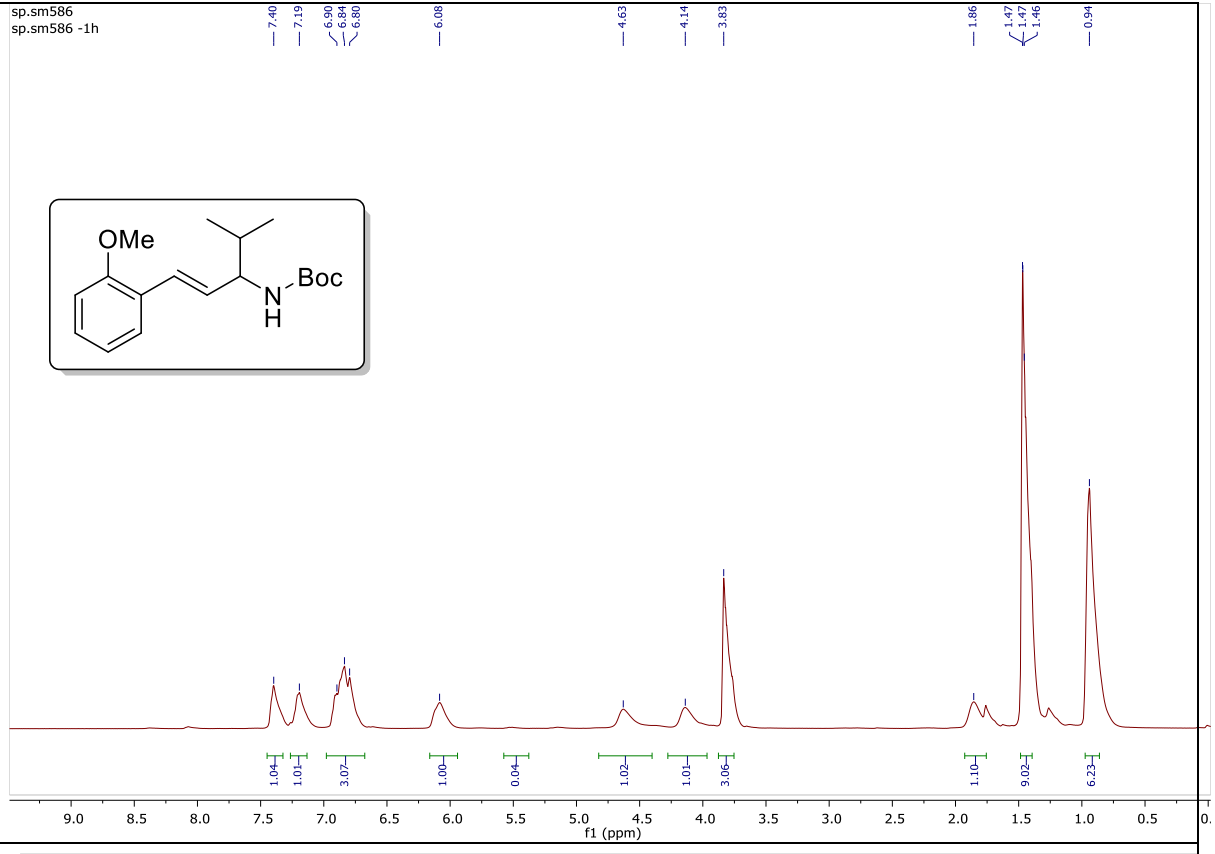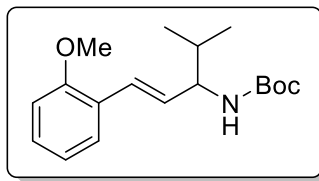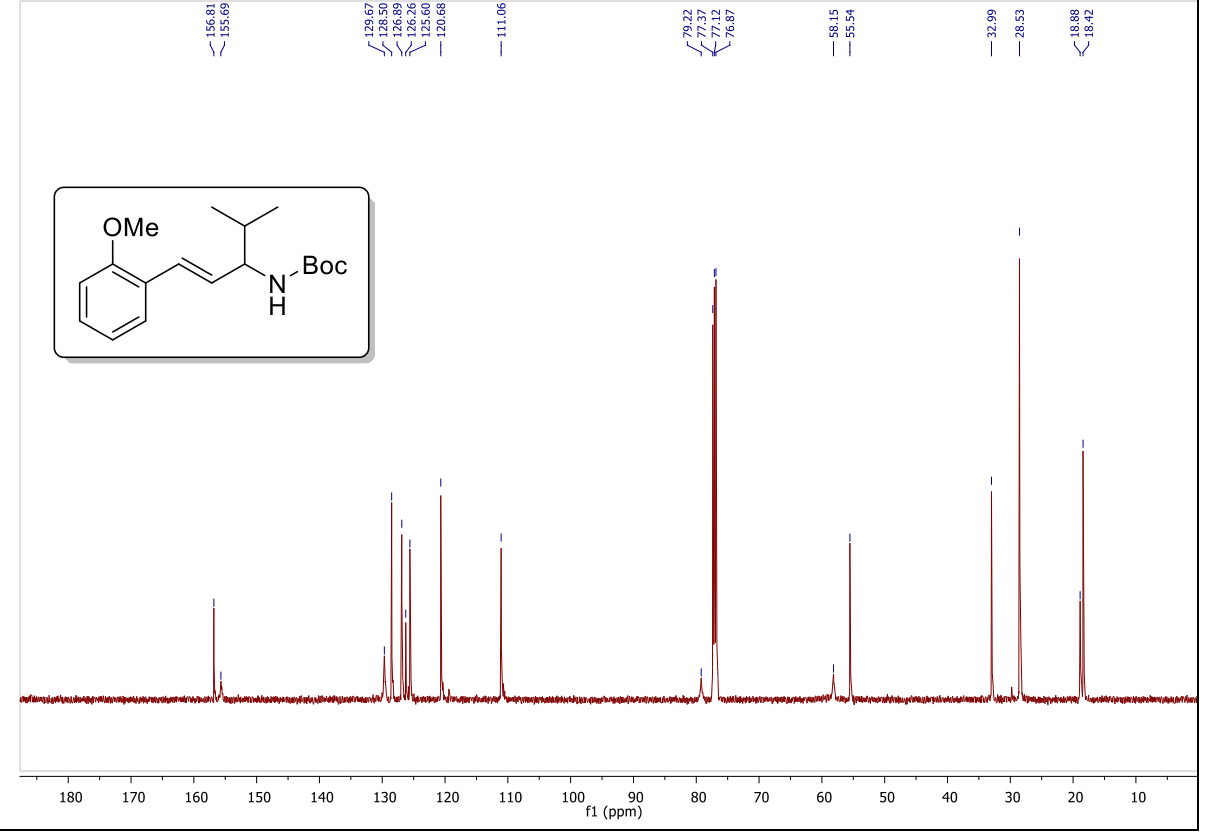

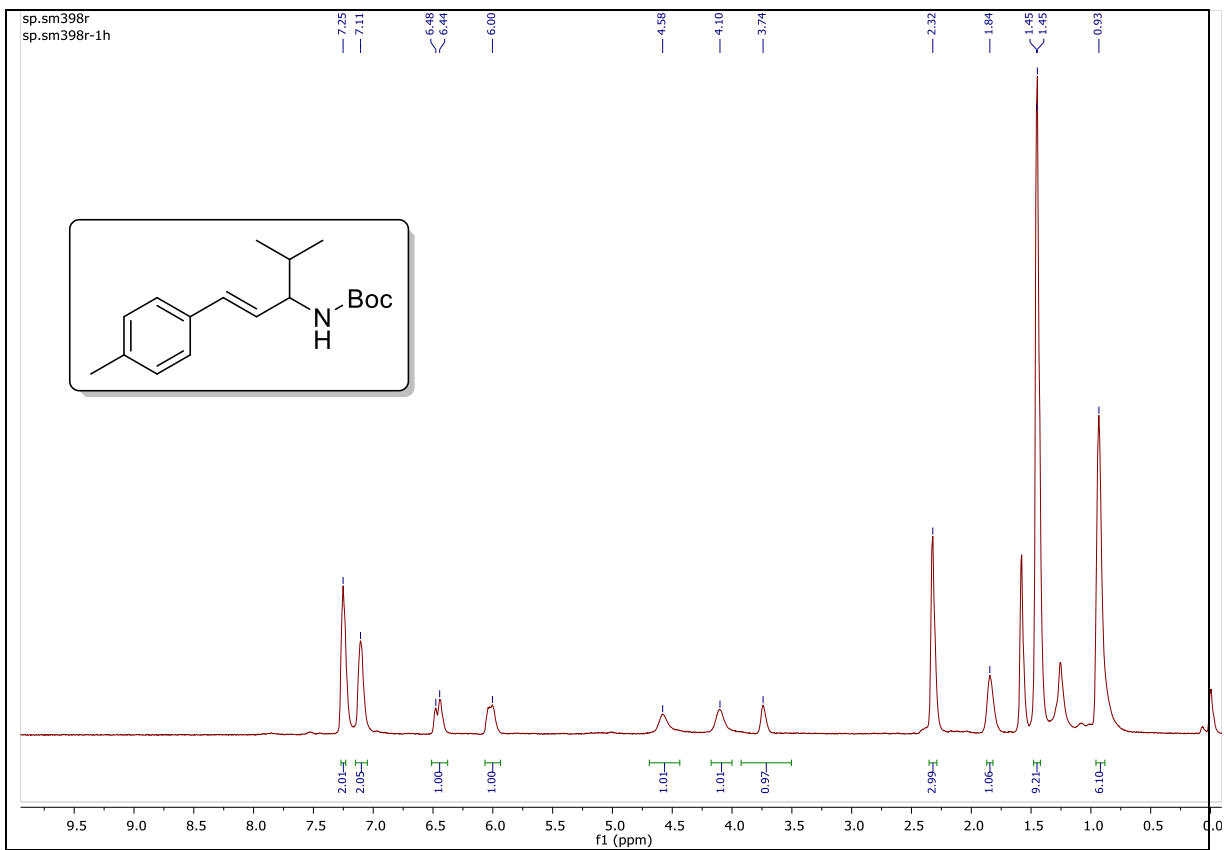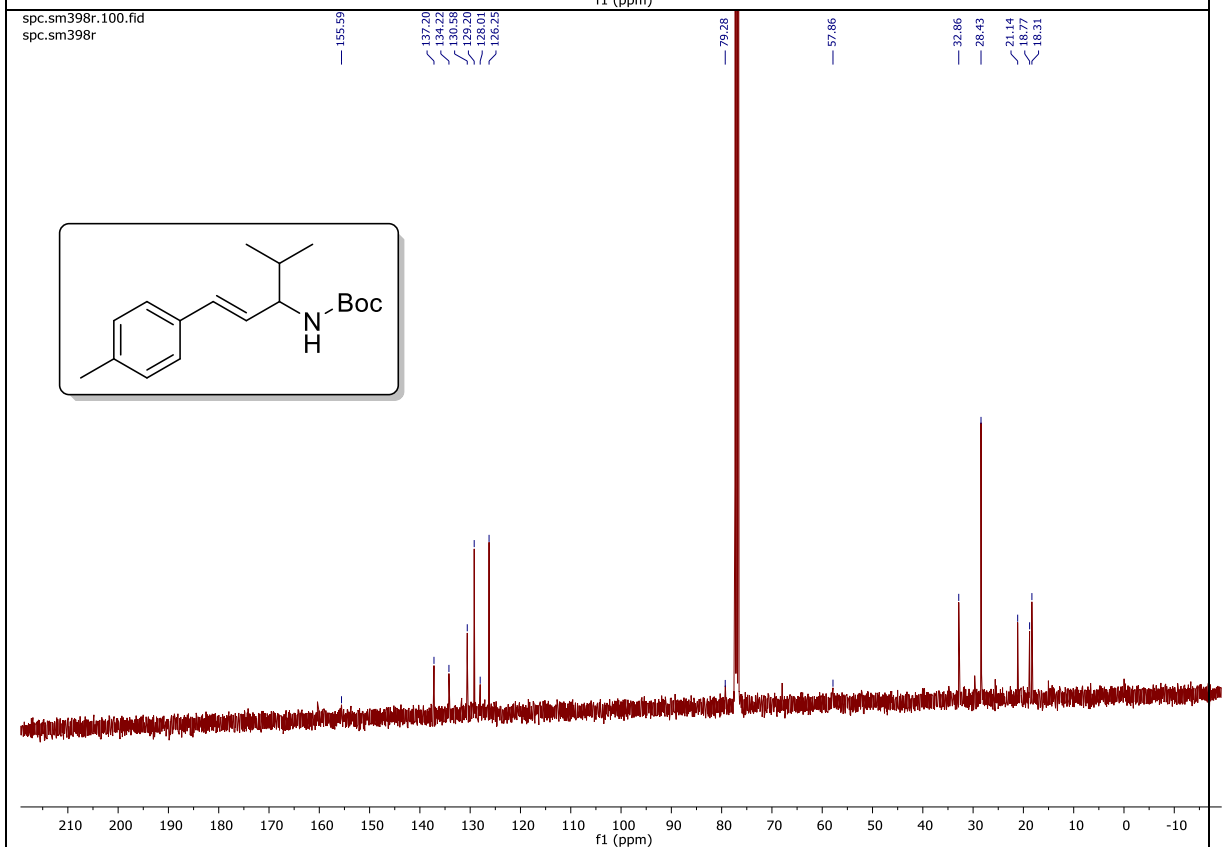

sp.sm444  
sp.sm444-1h

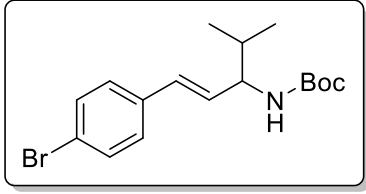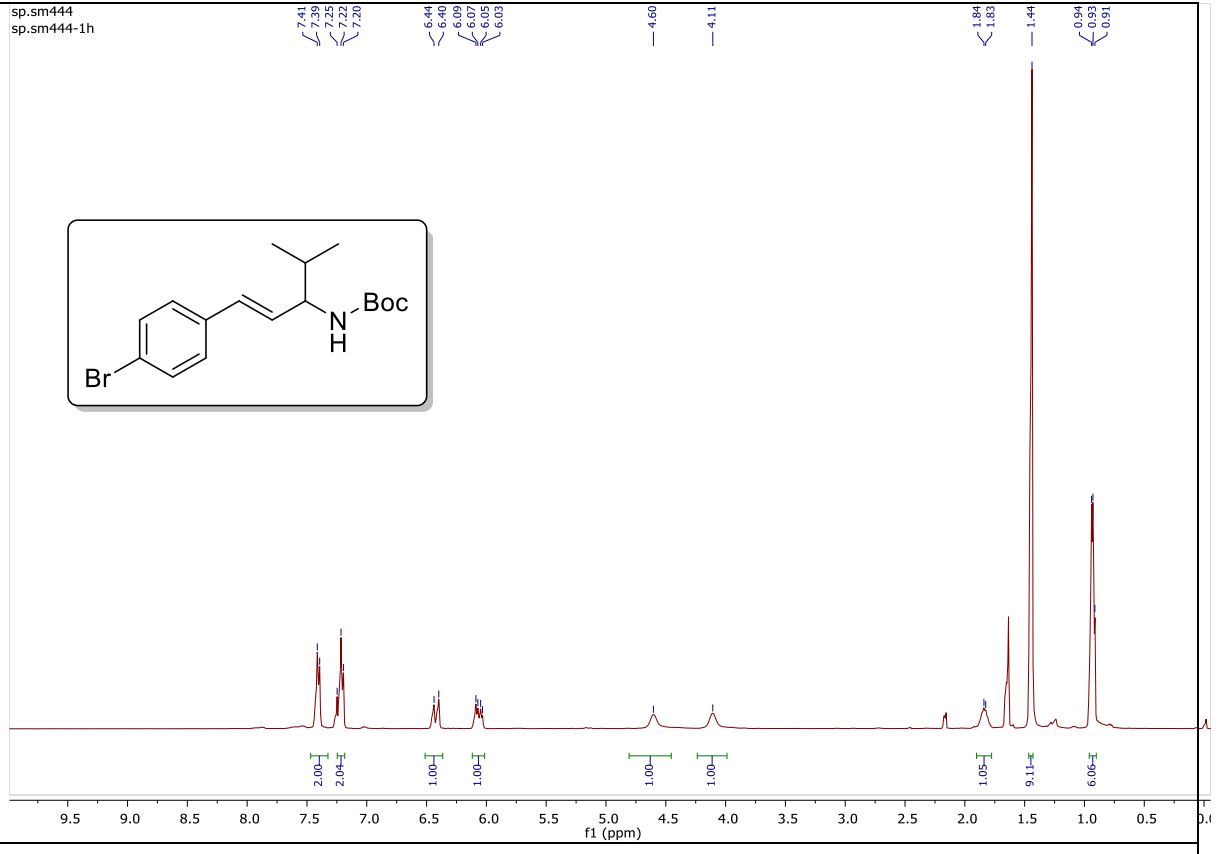

sp.sm444  
sp / sm / 444- 13c-500mhz

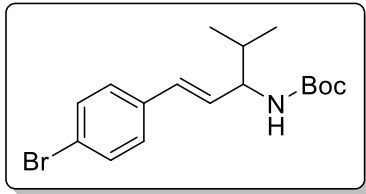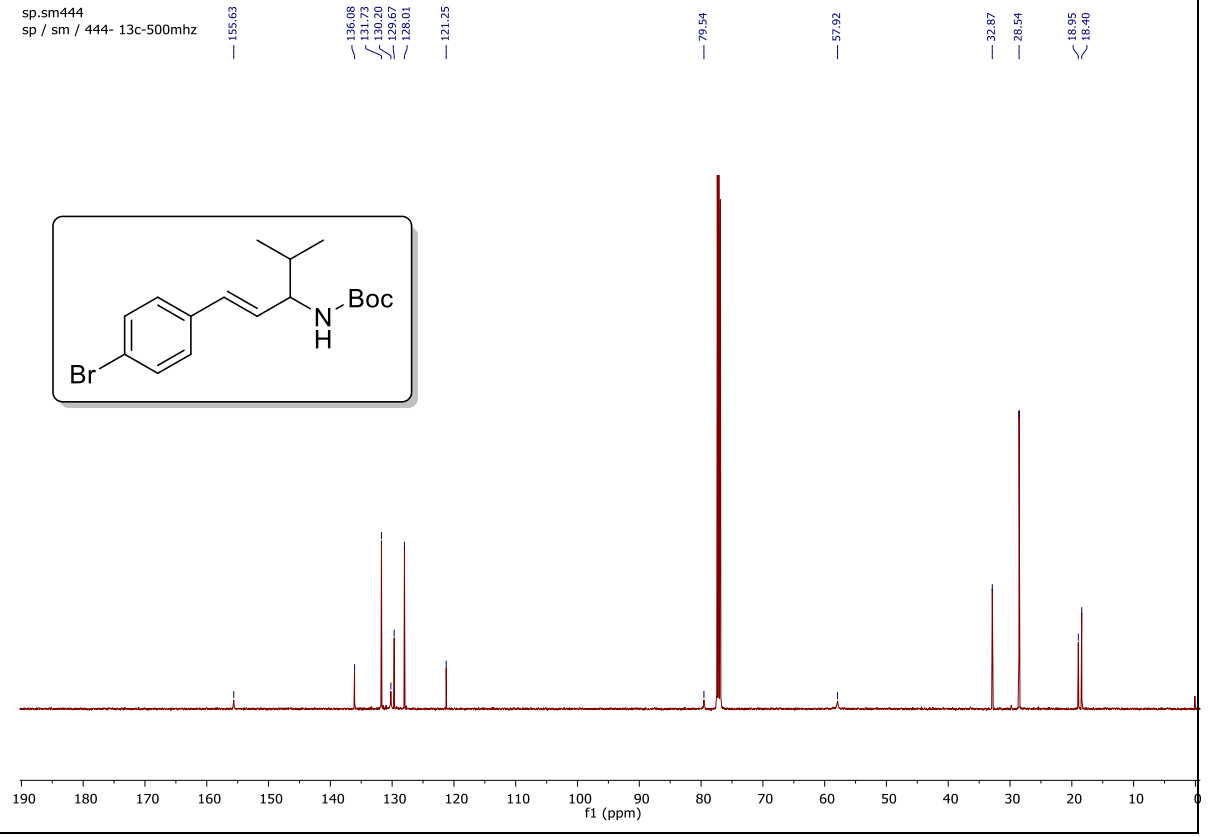

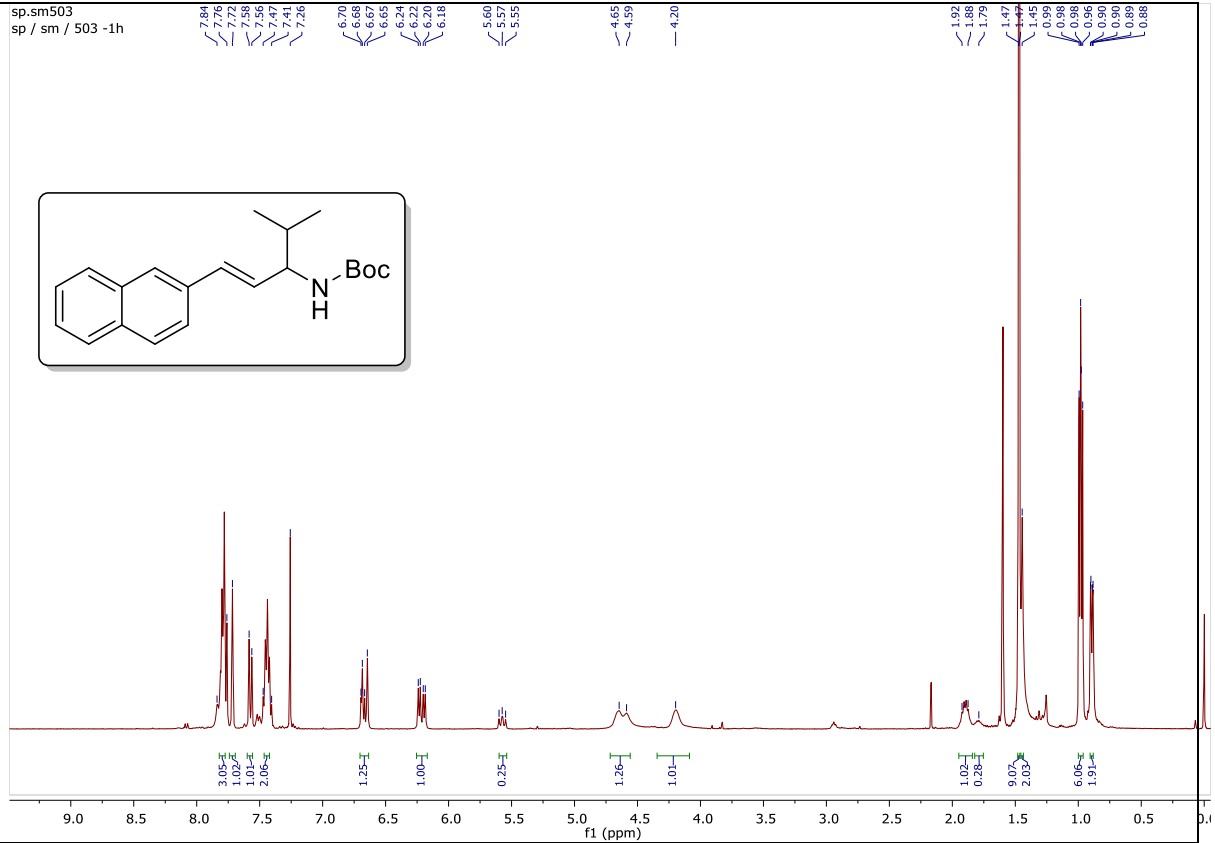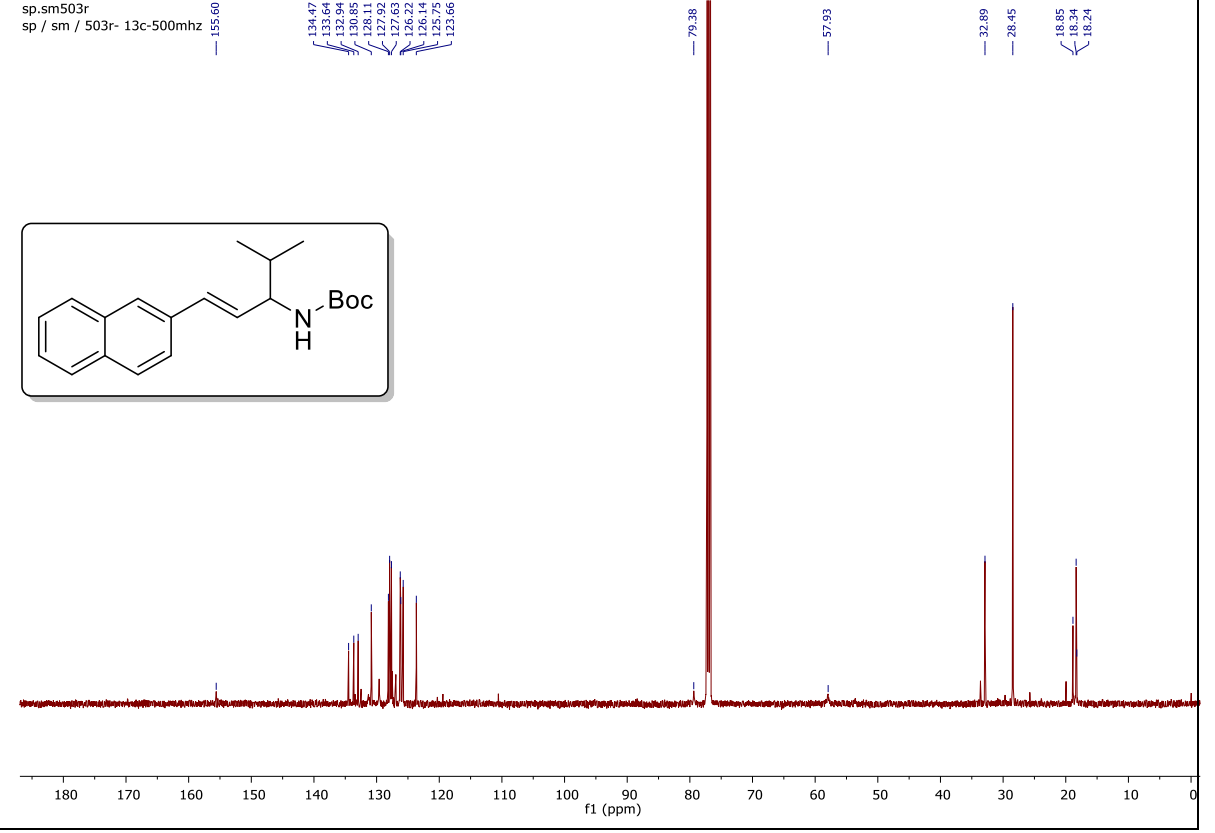

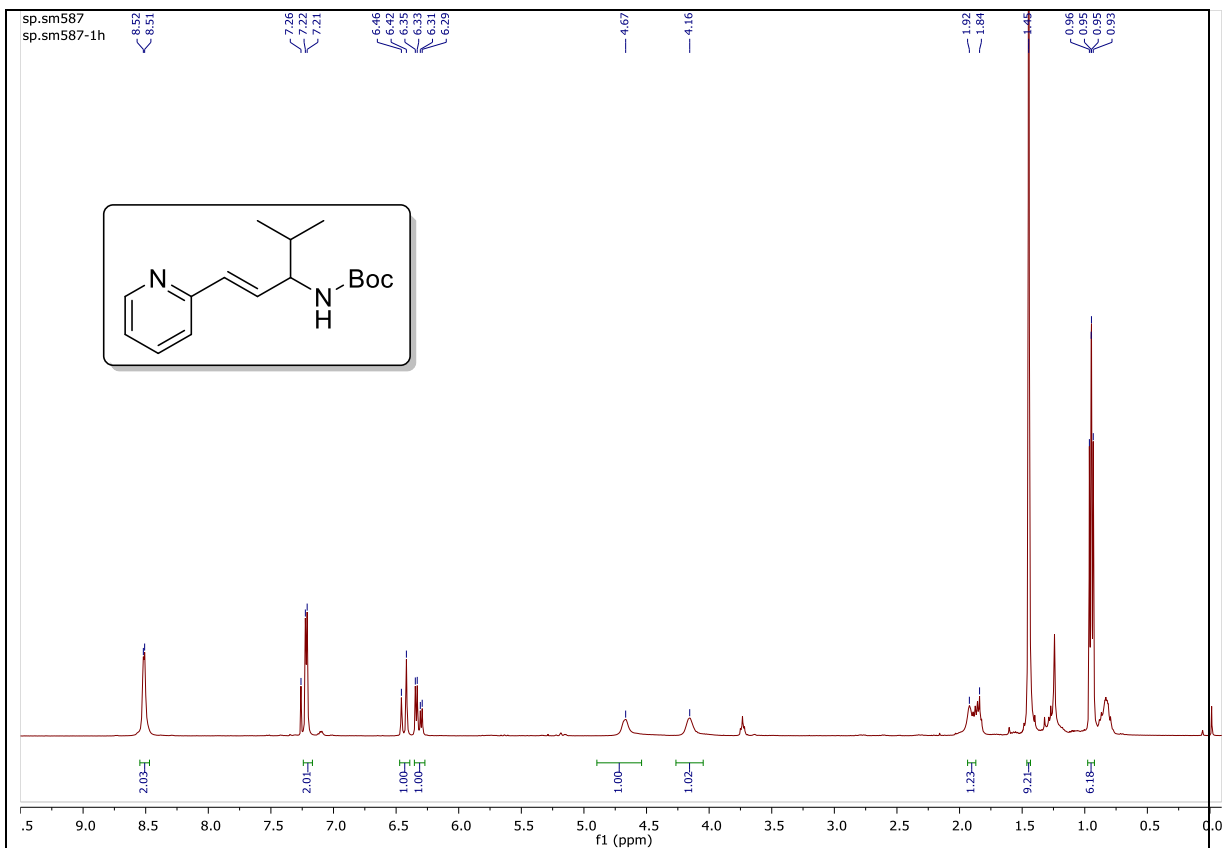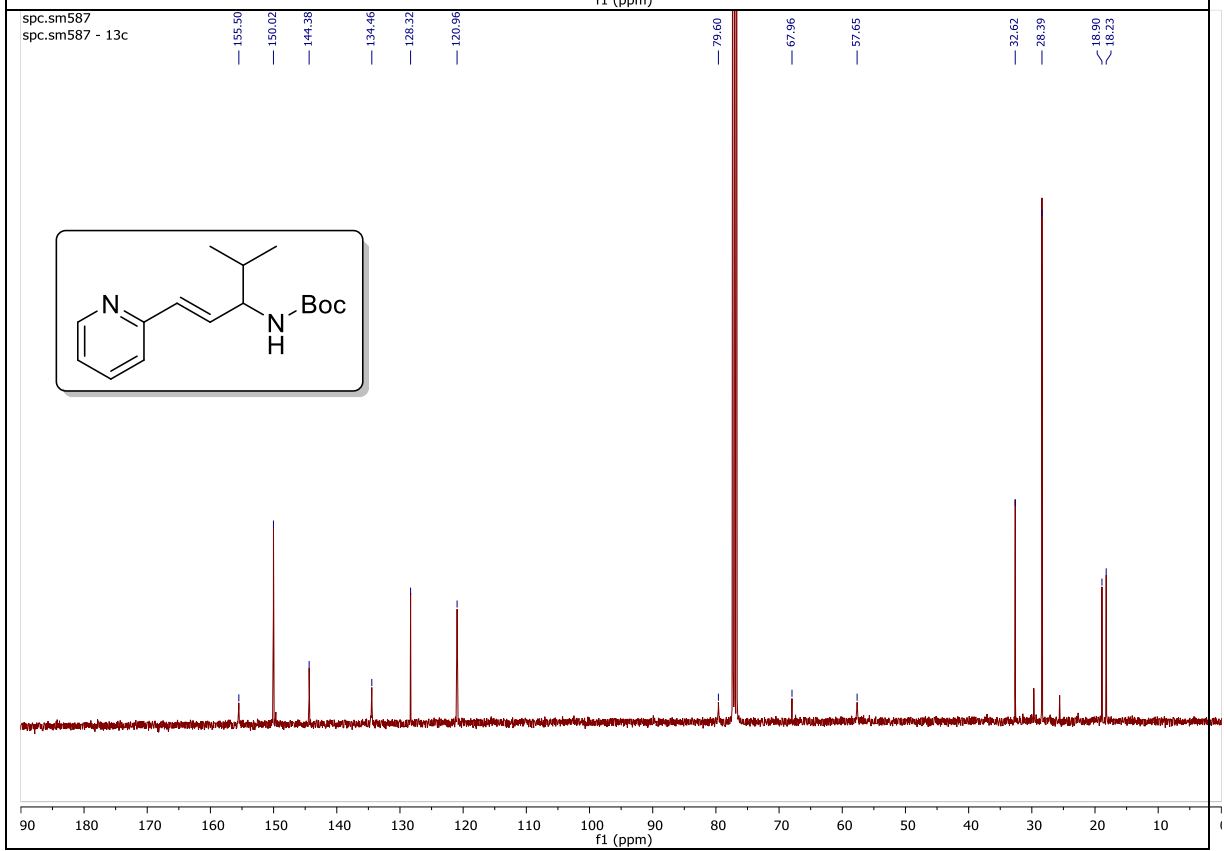



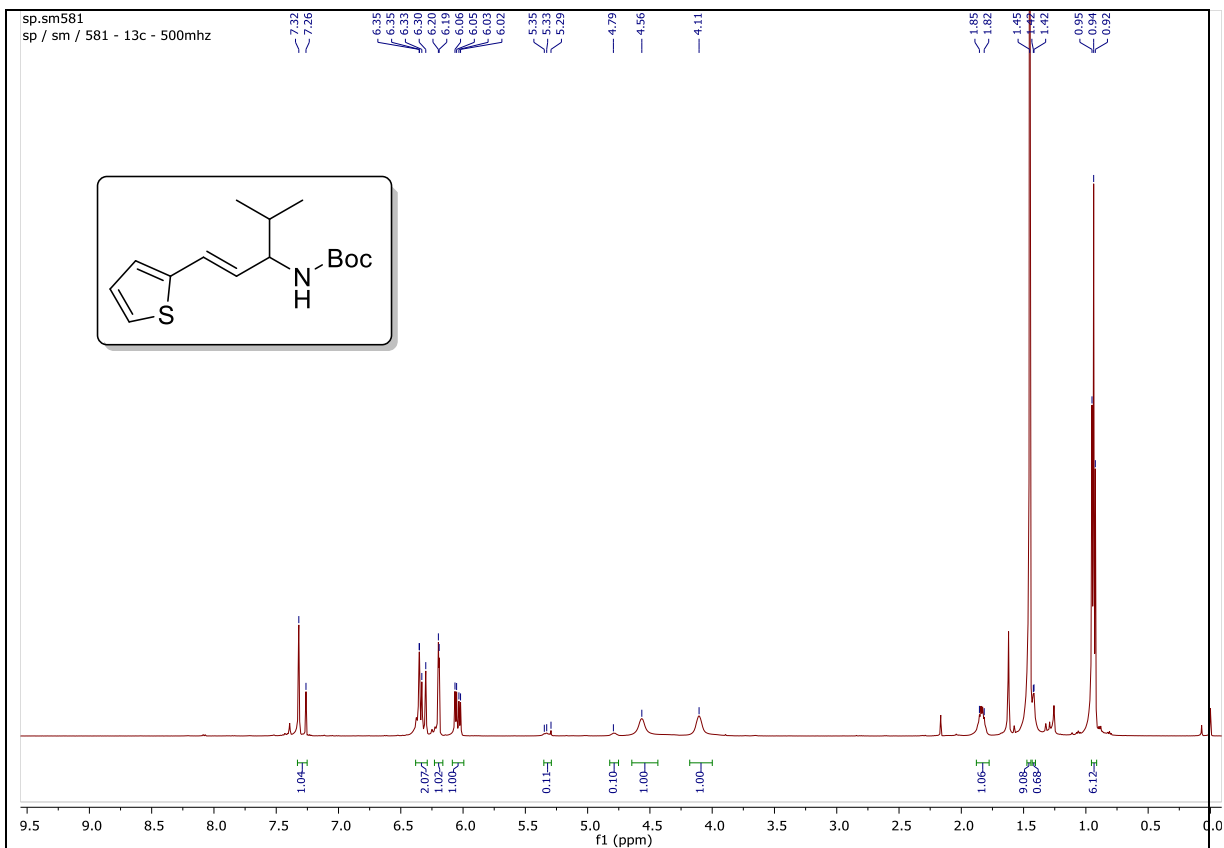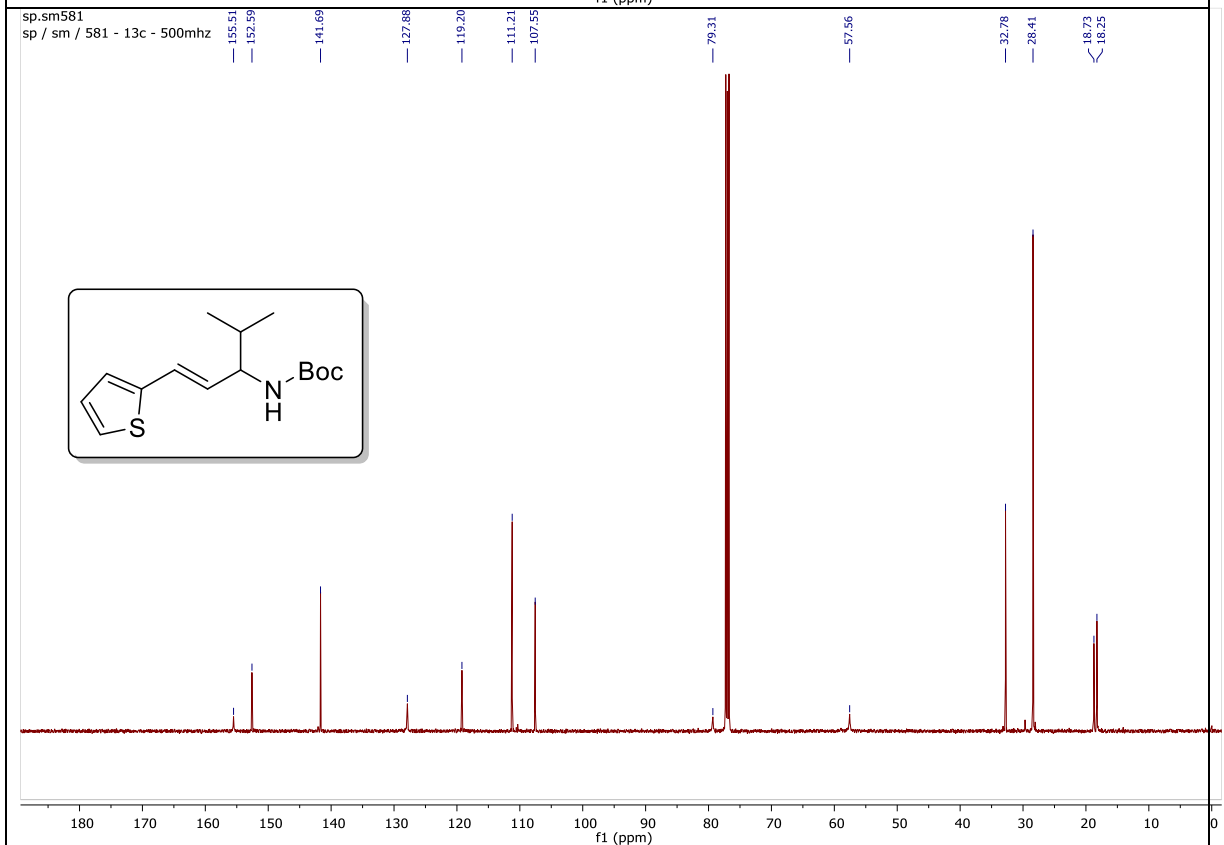

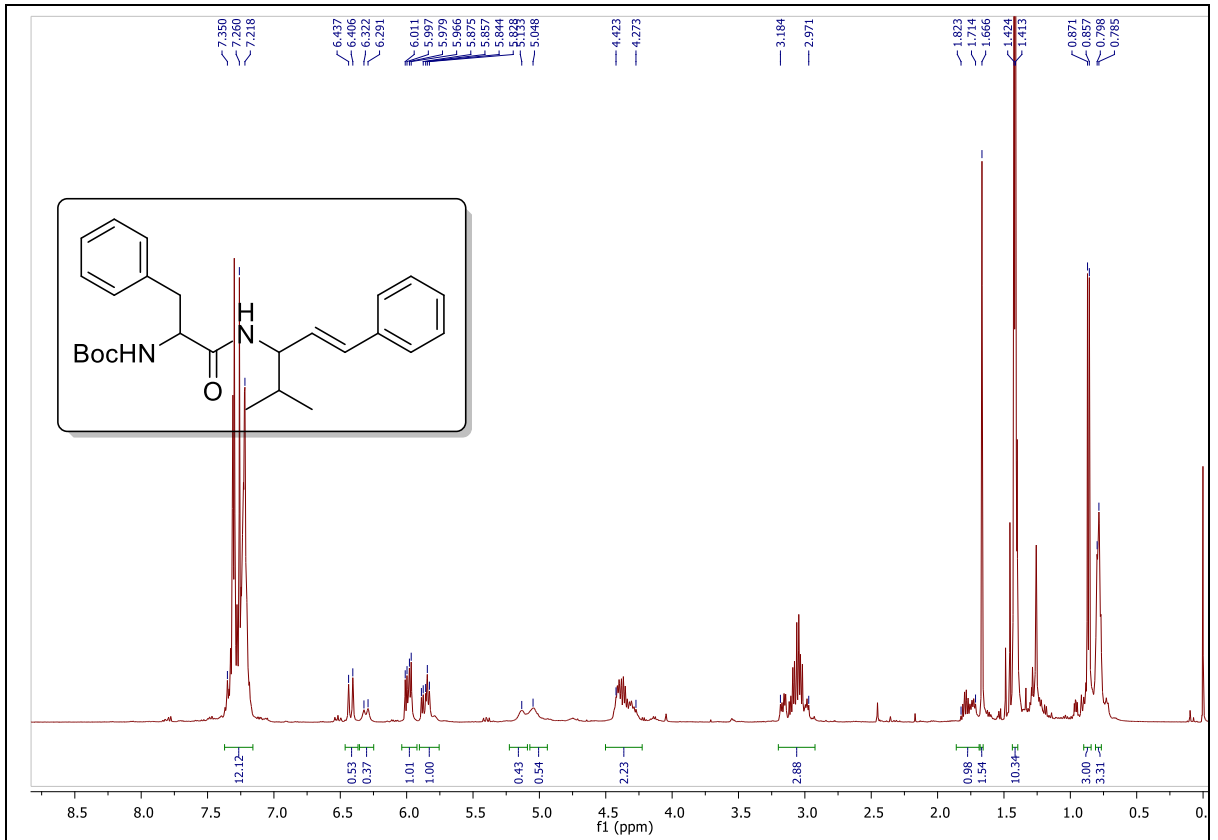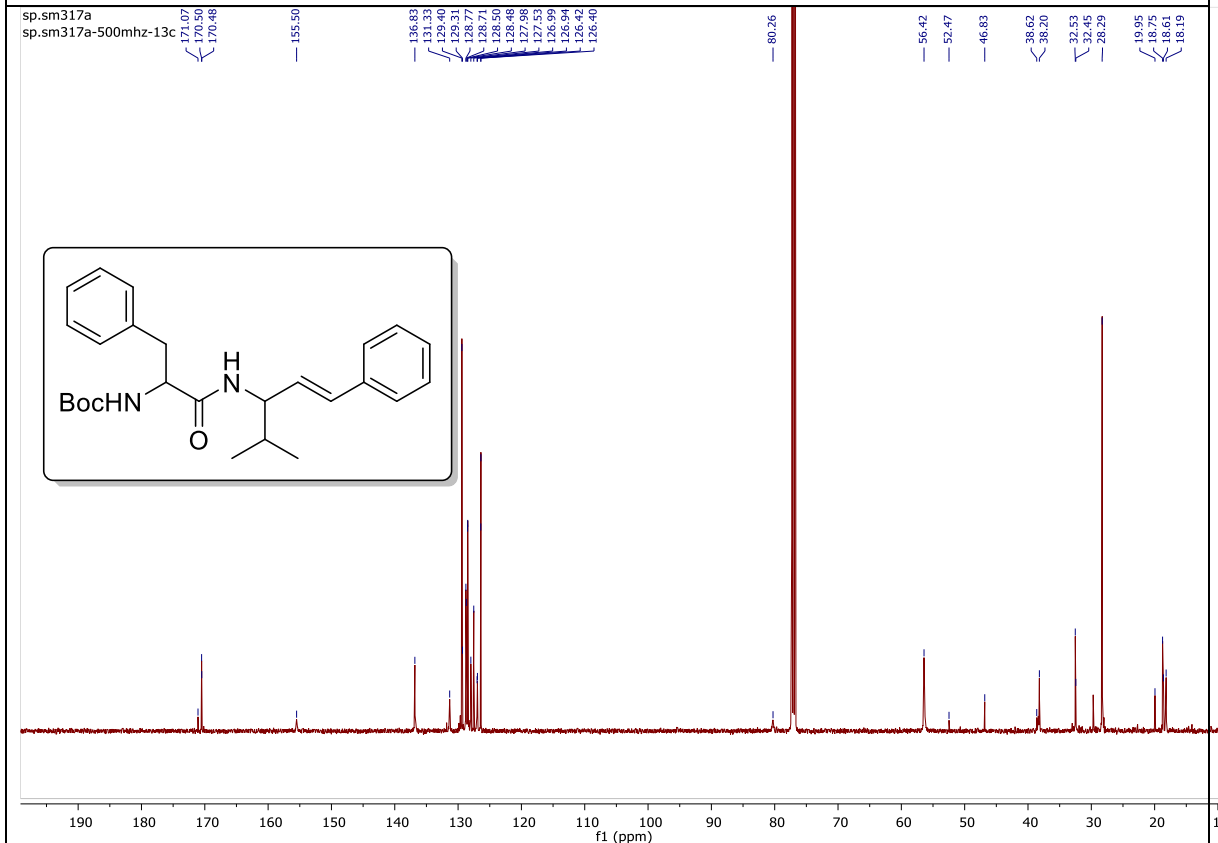

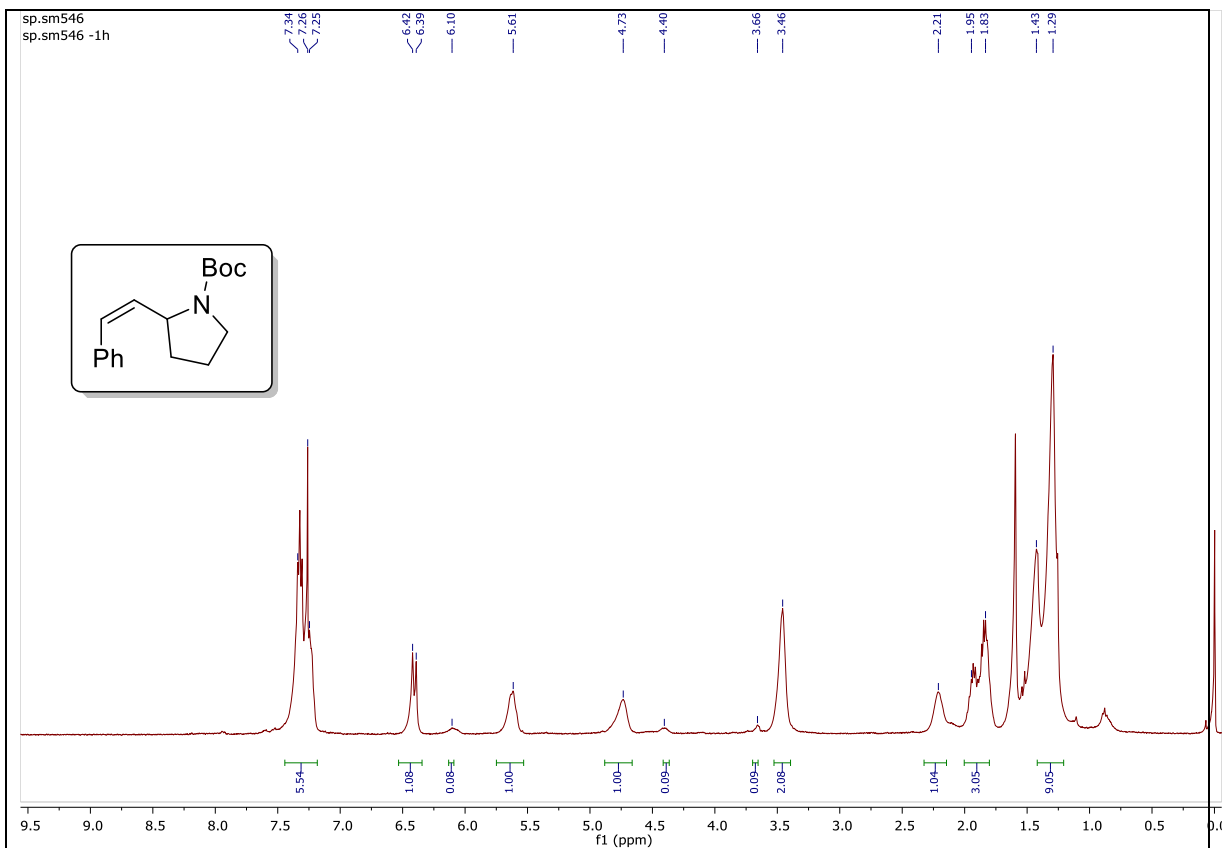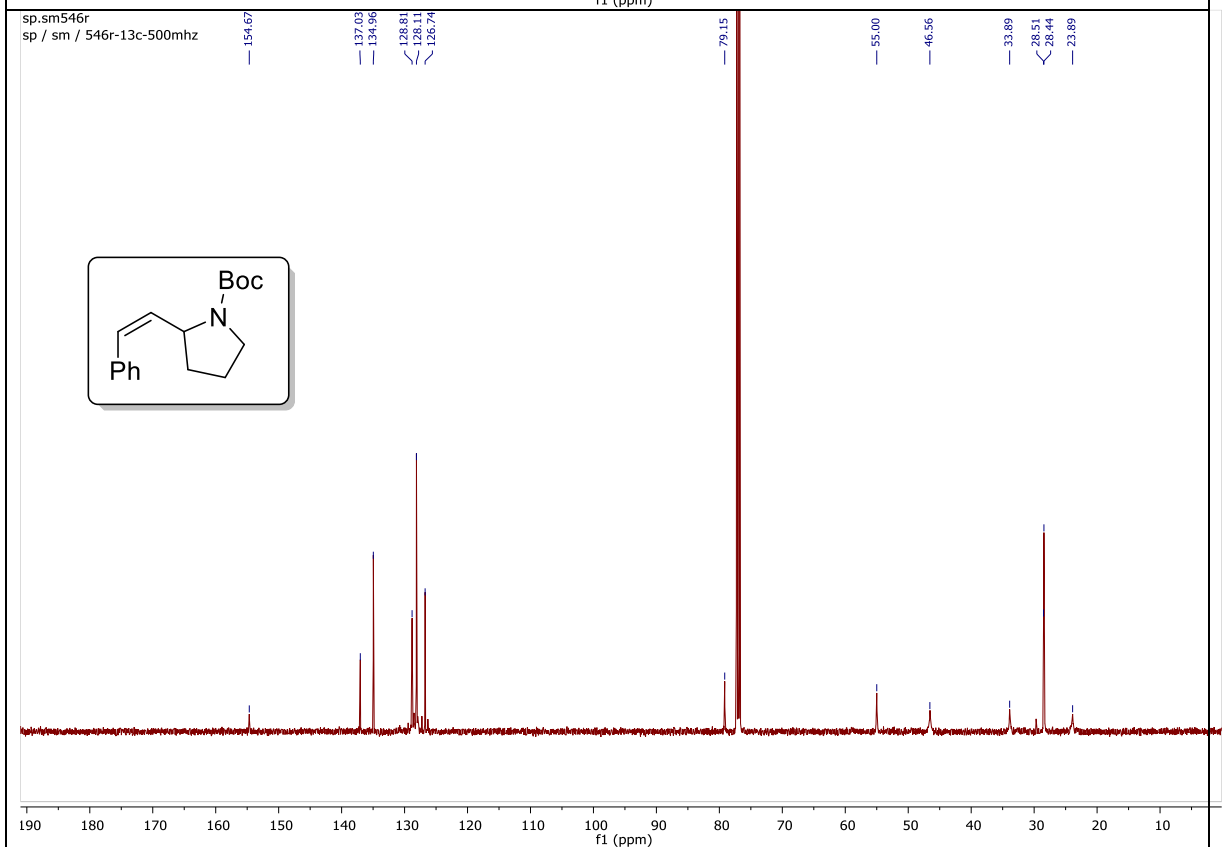

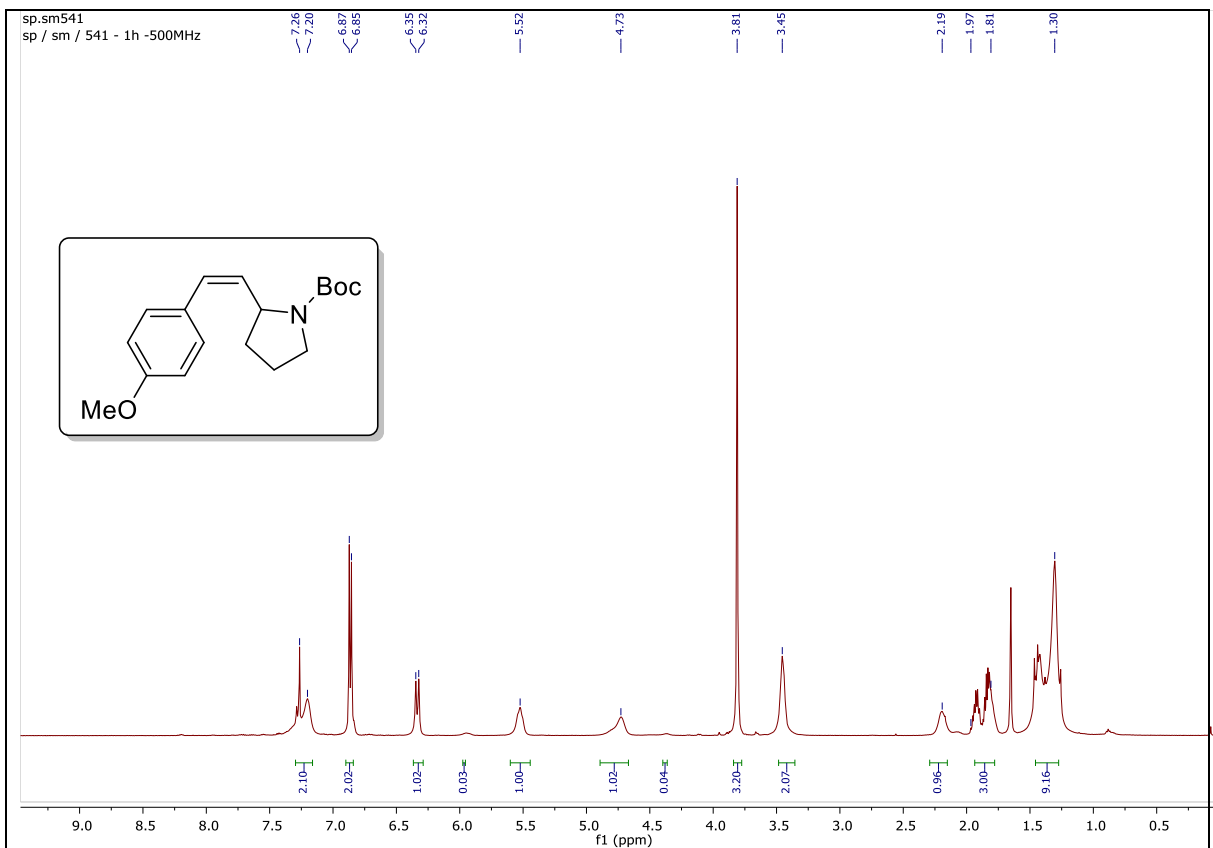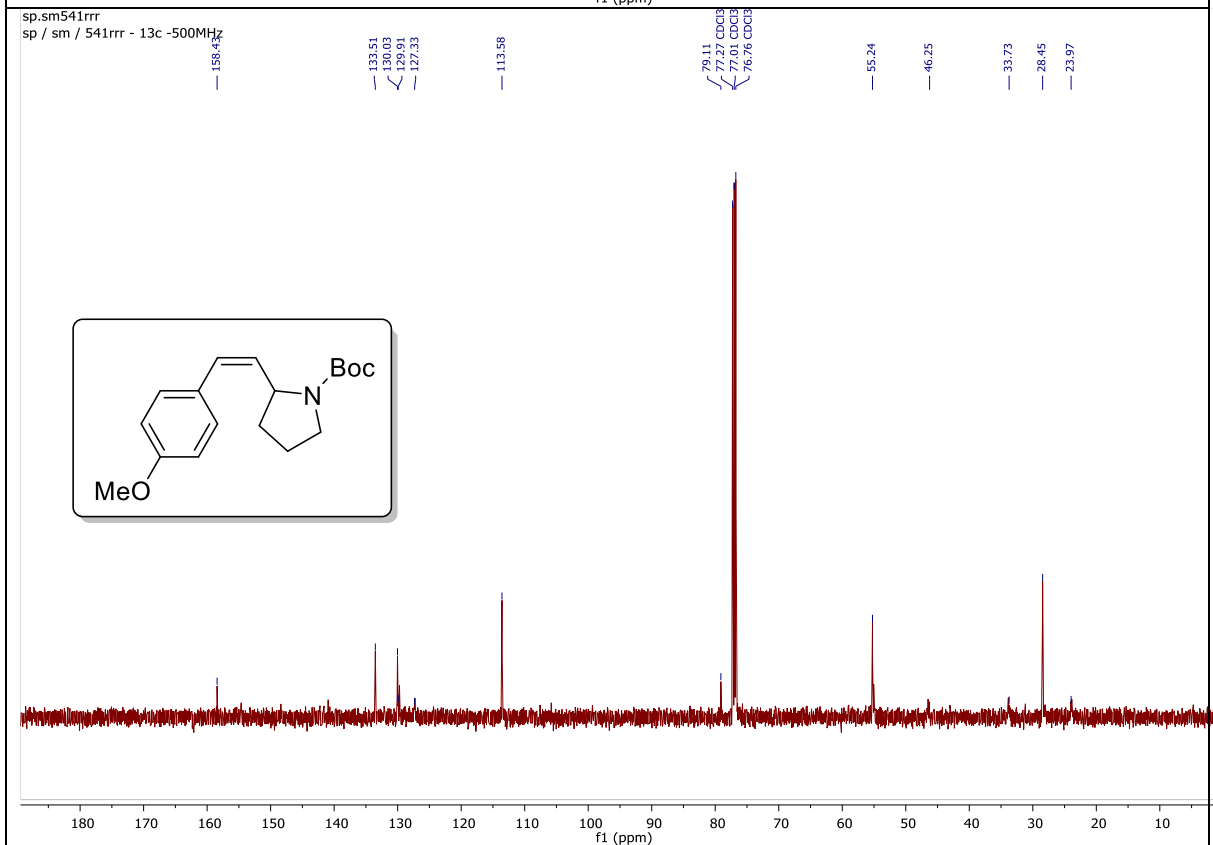

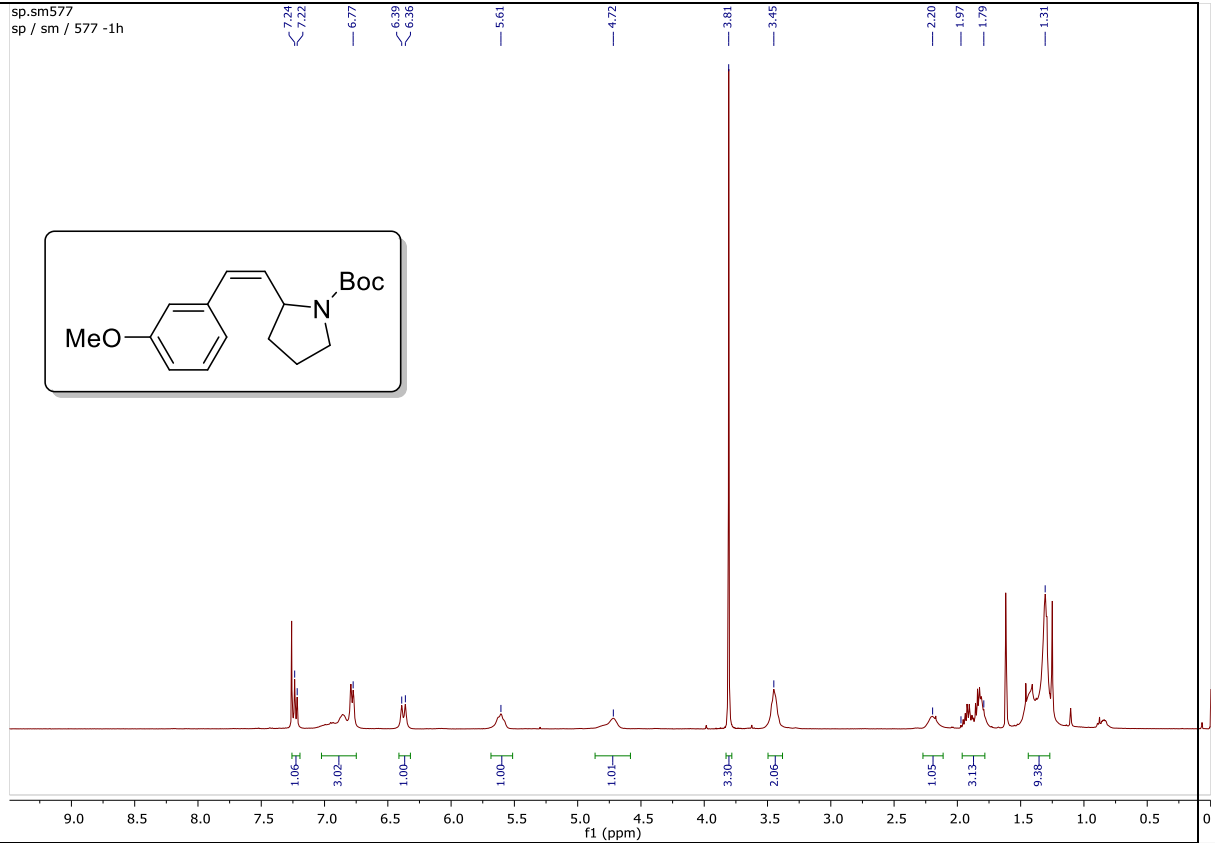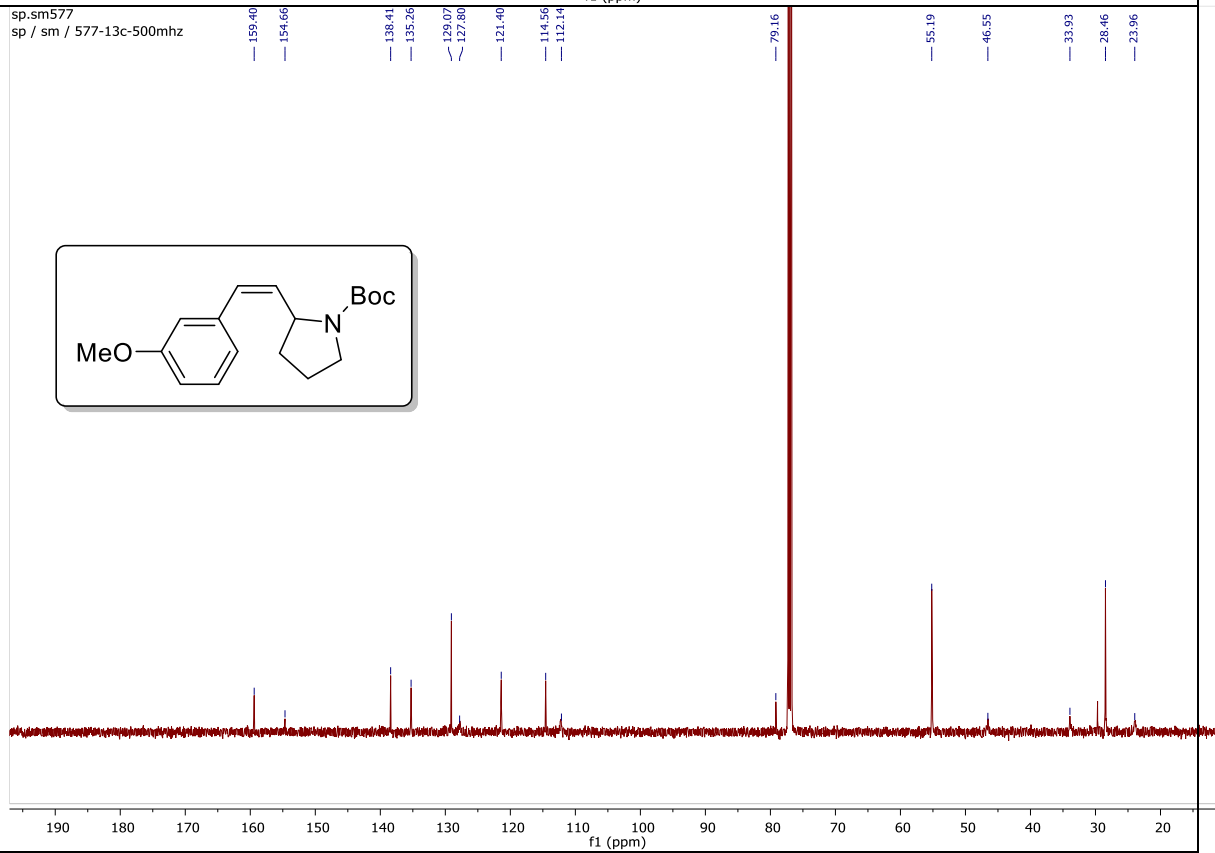

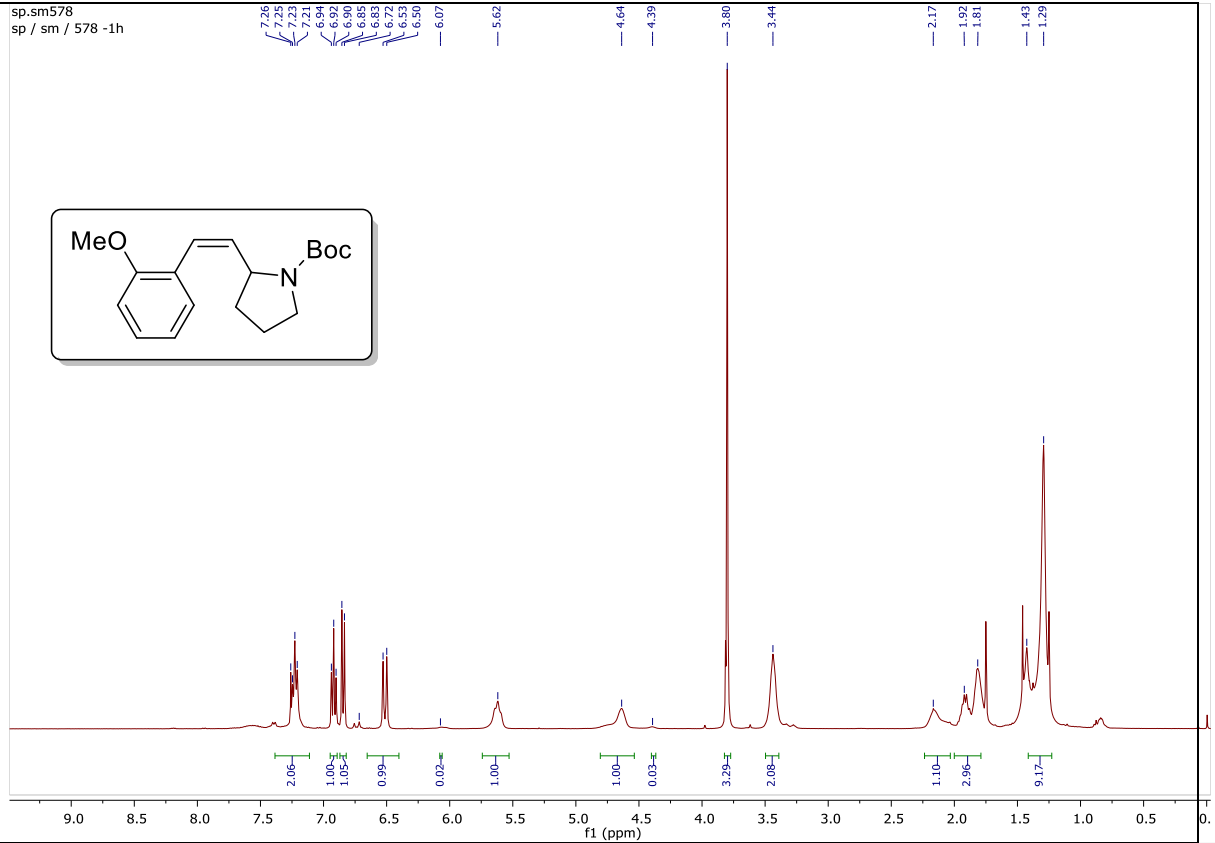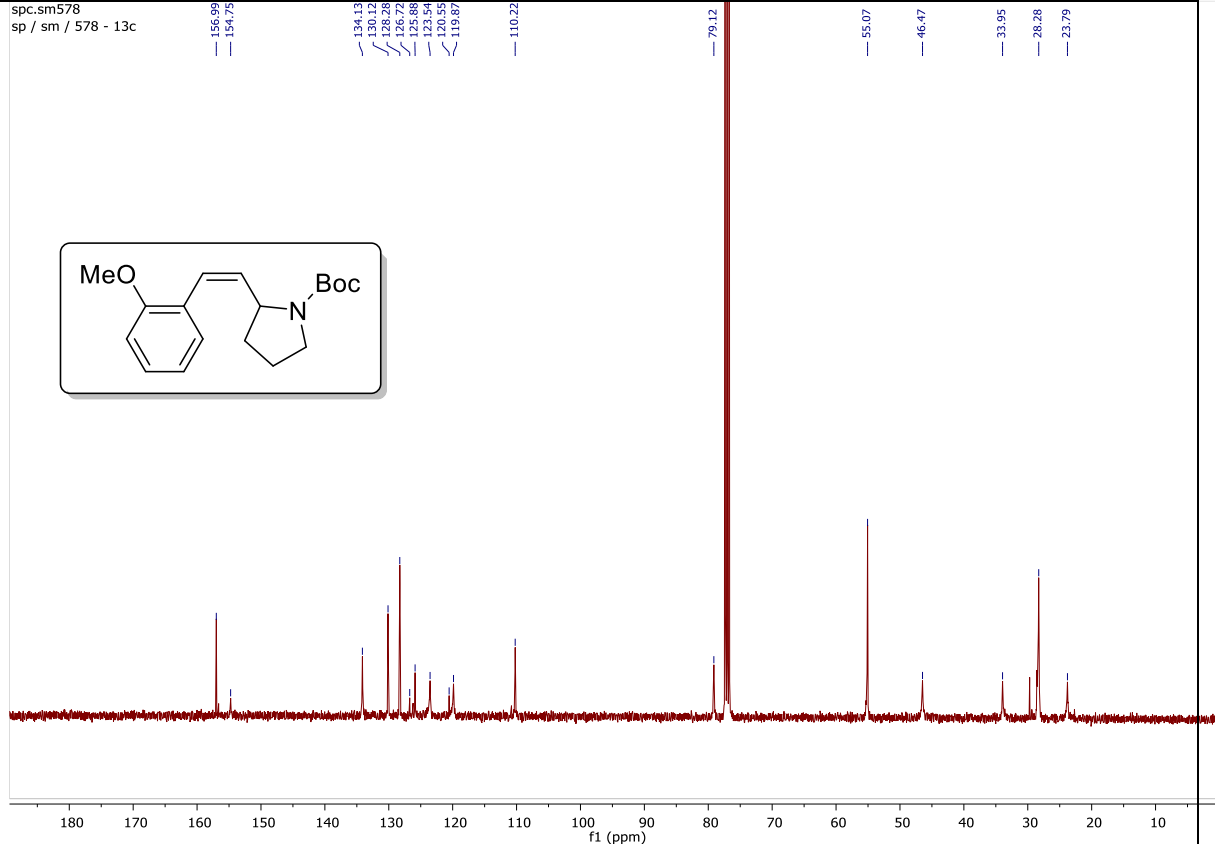

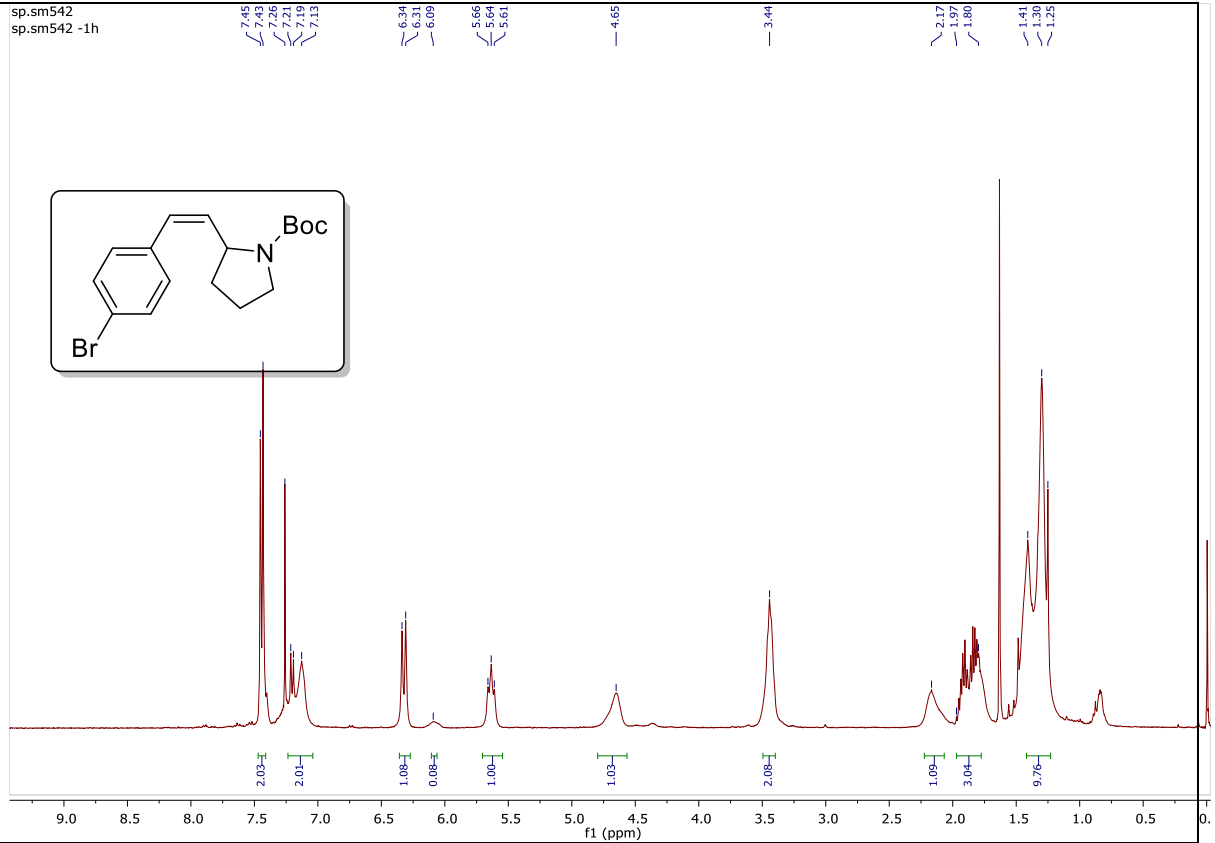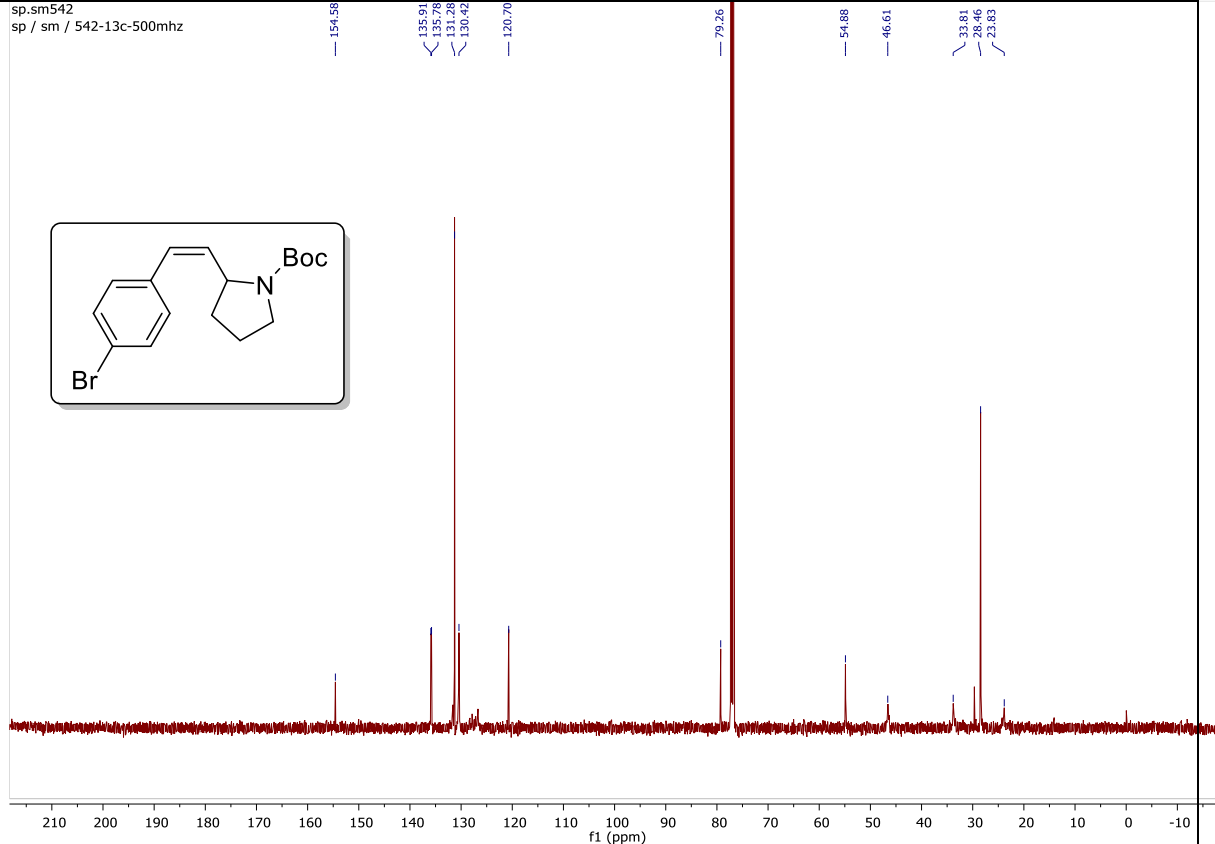

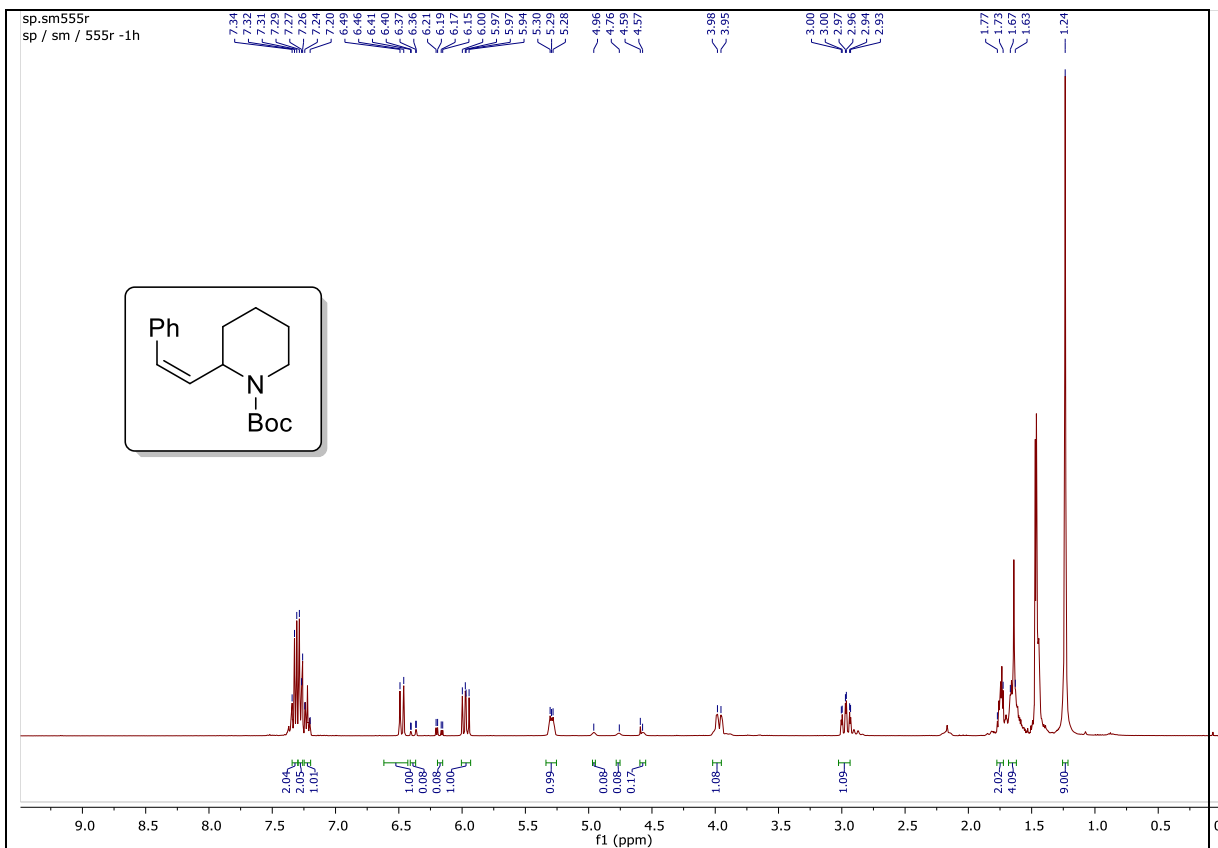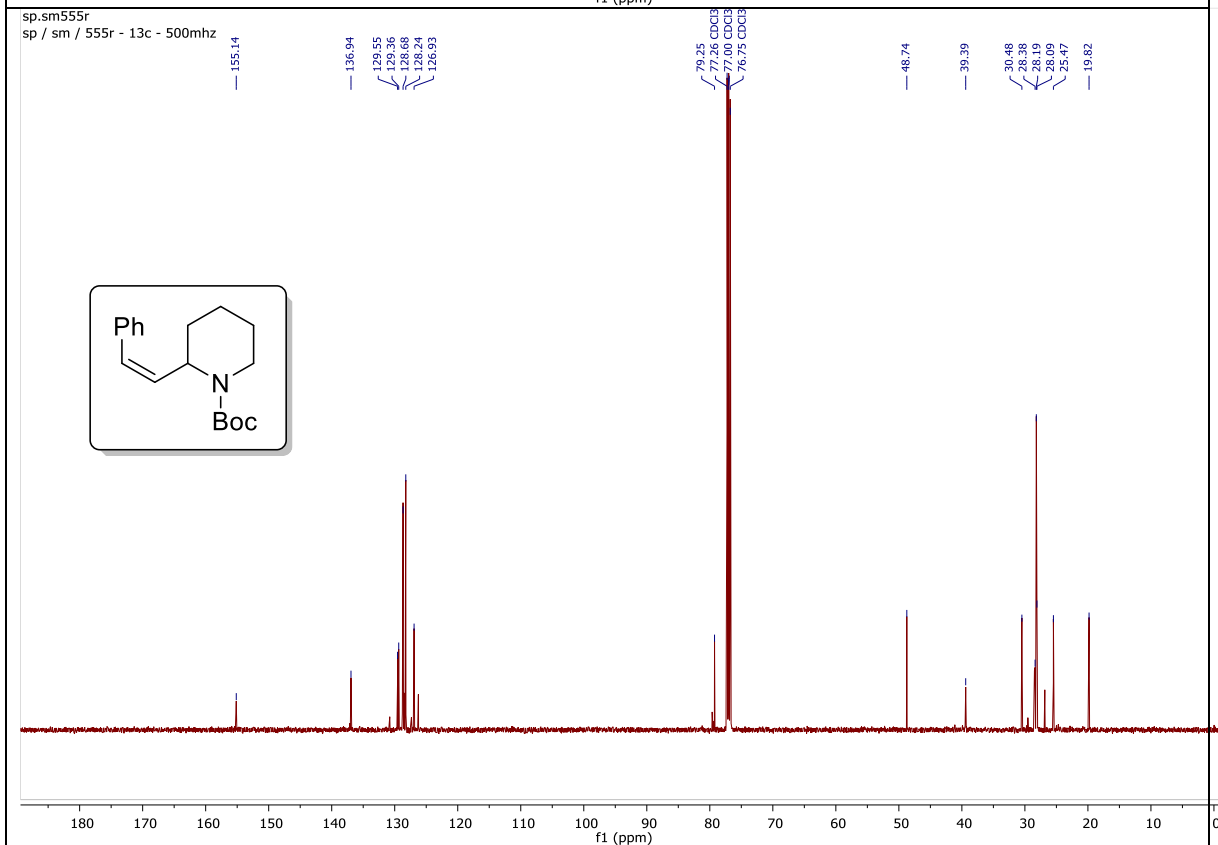



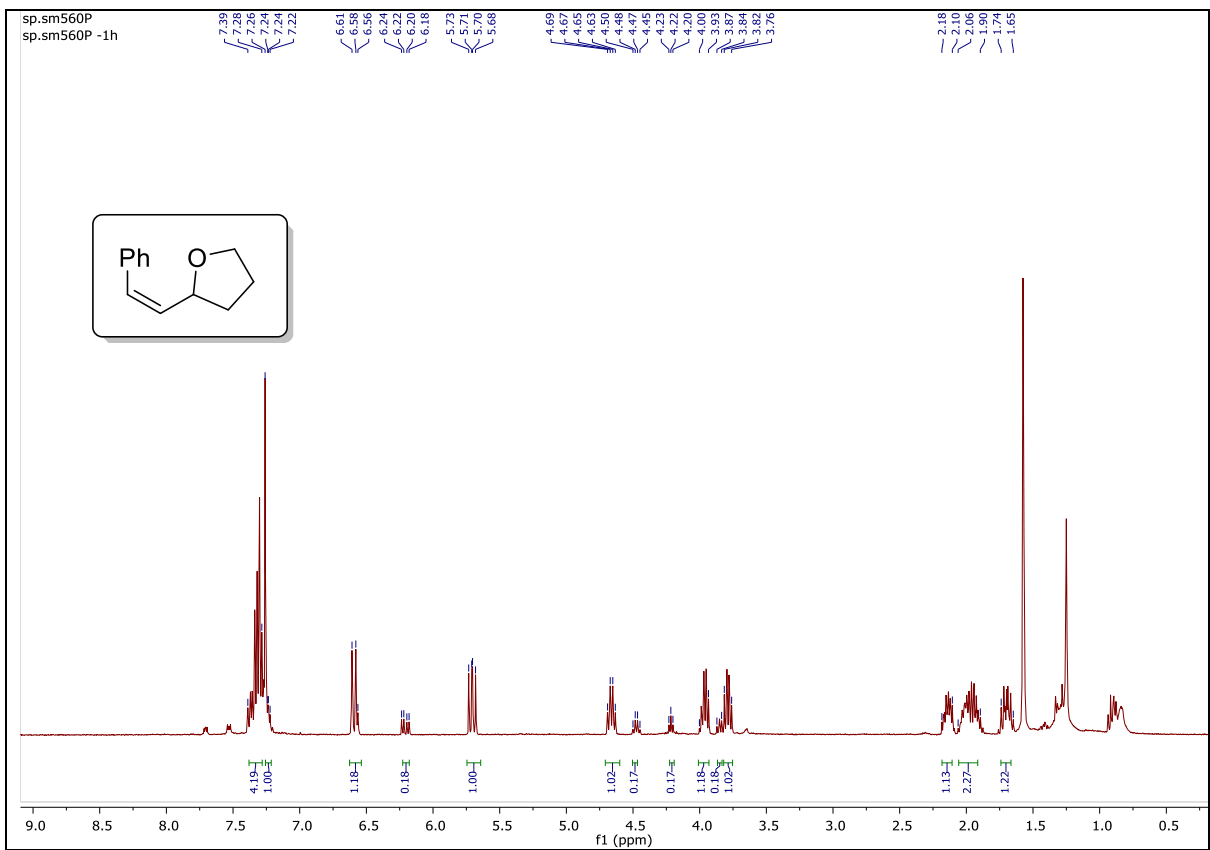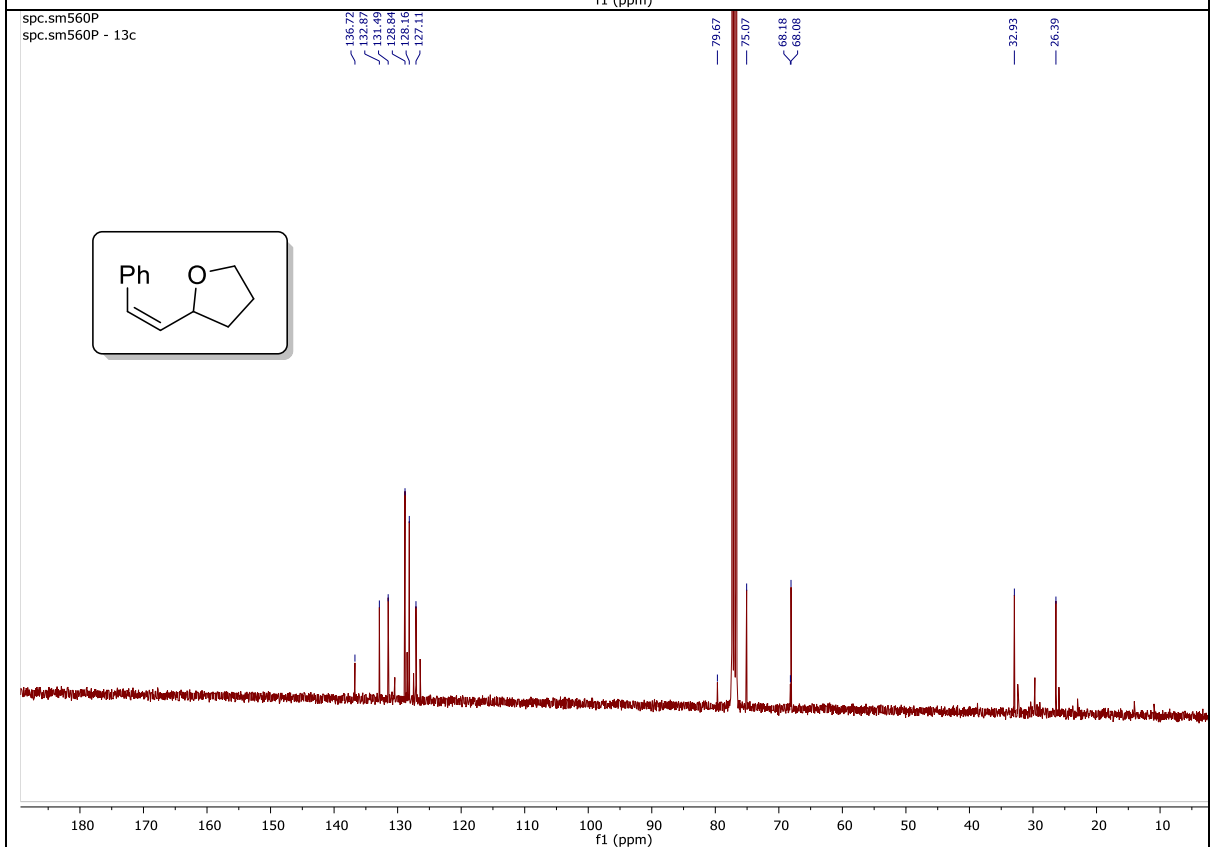

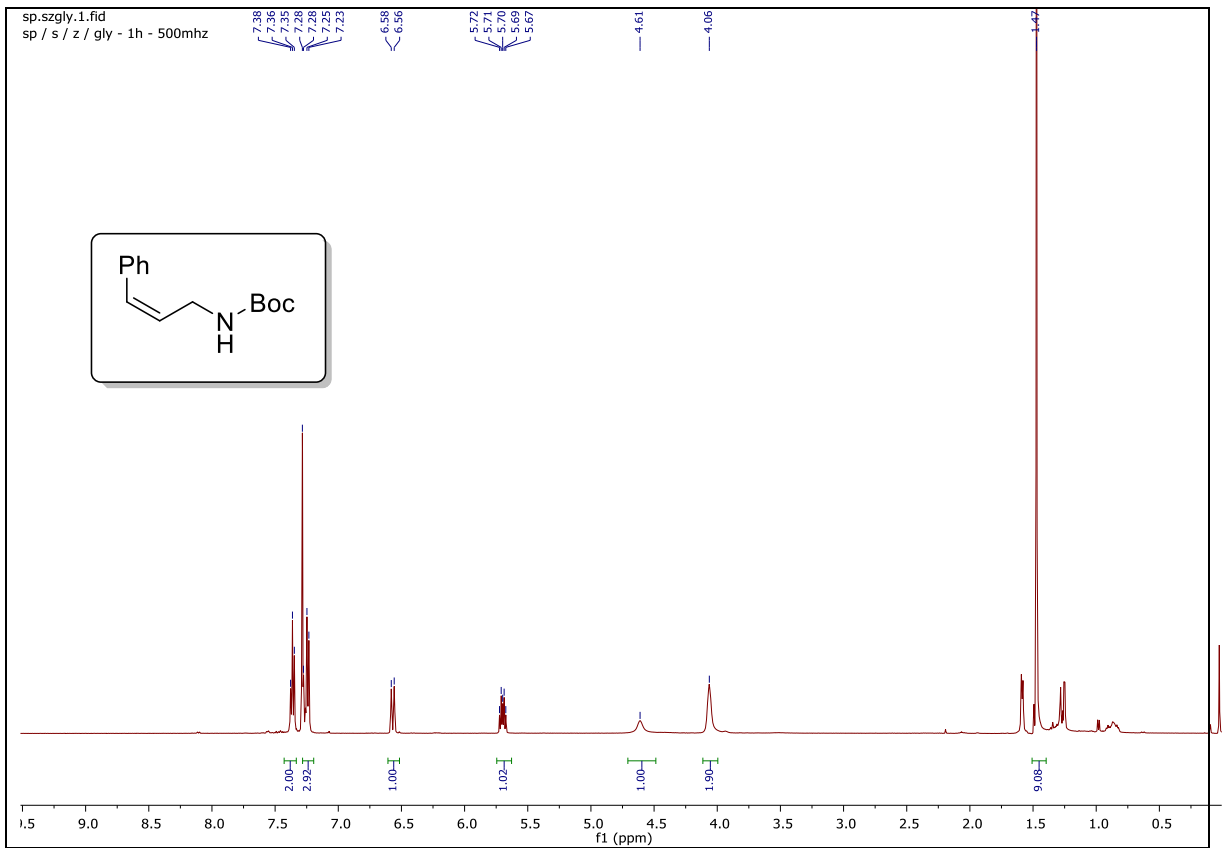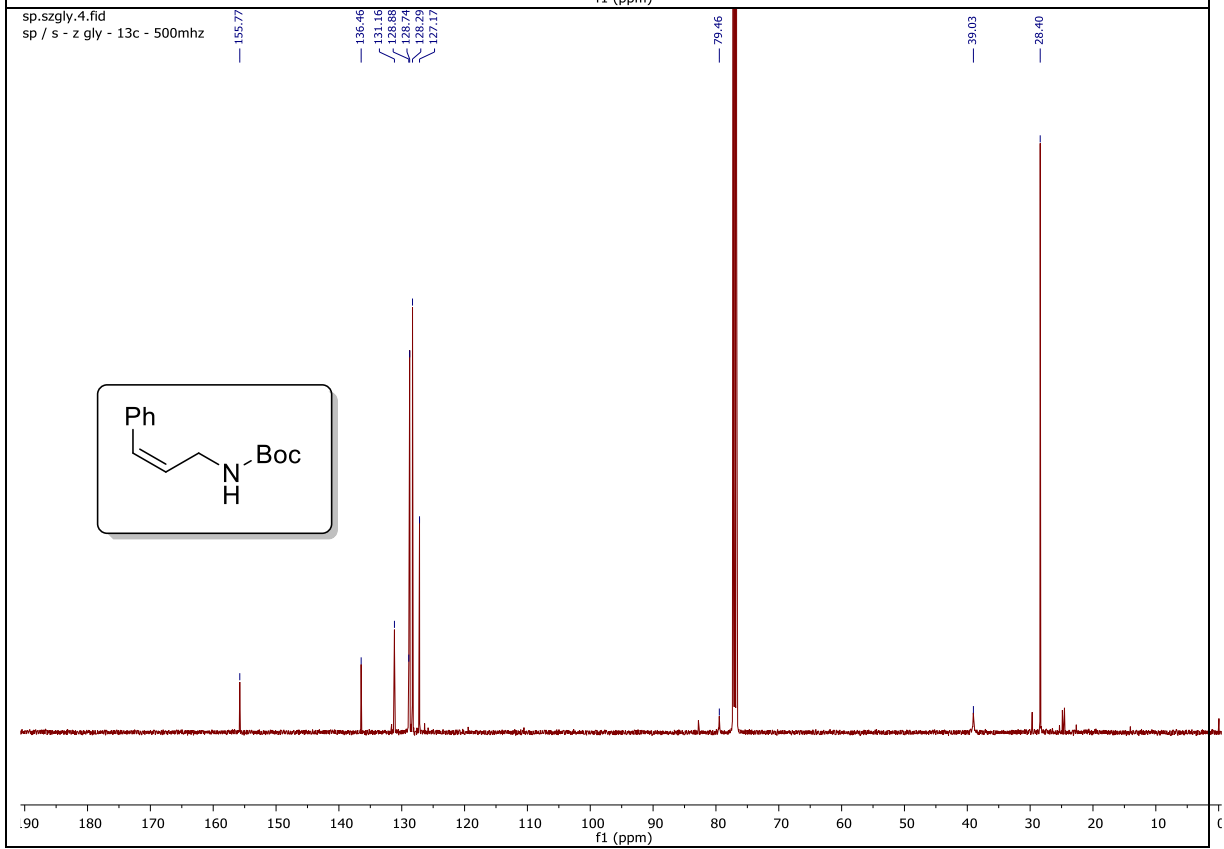

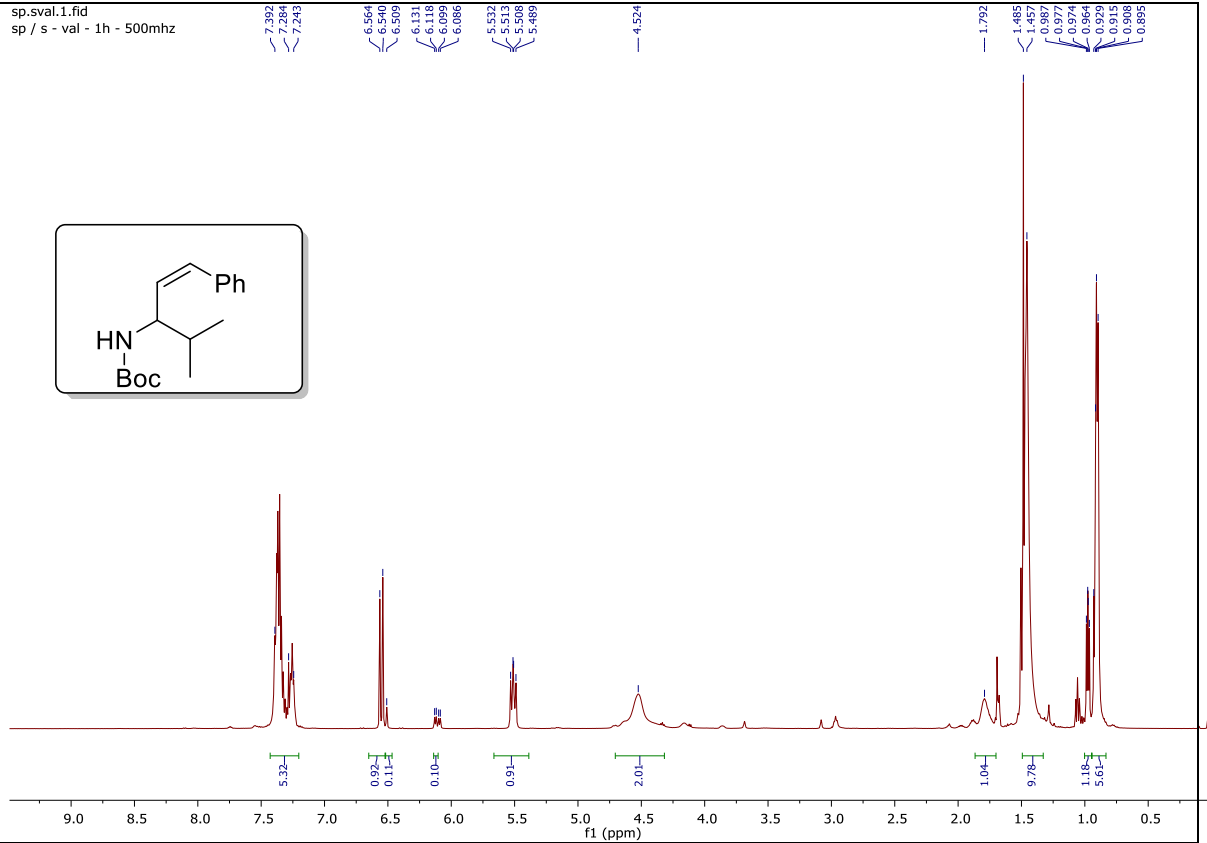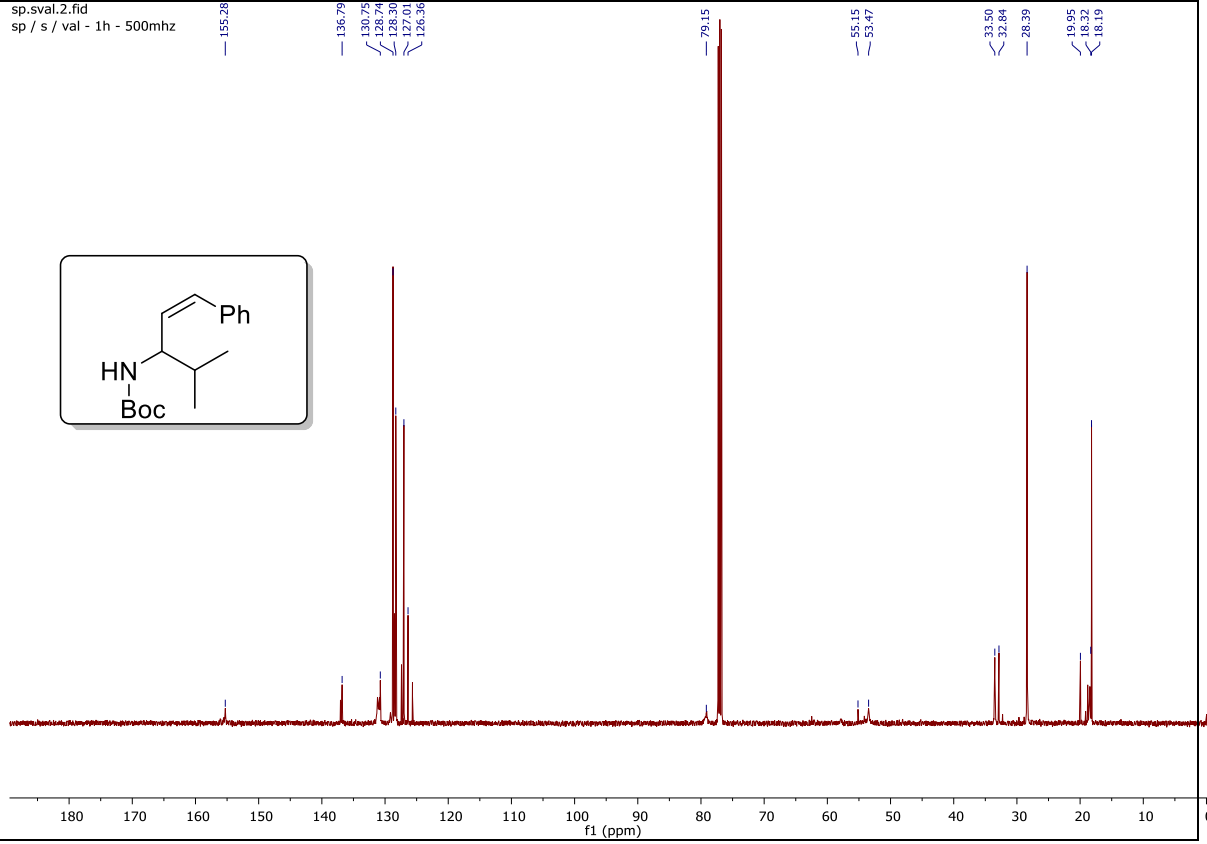

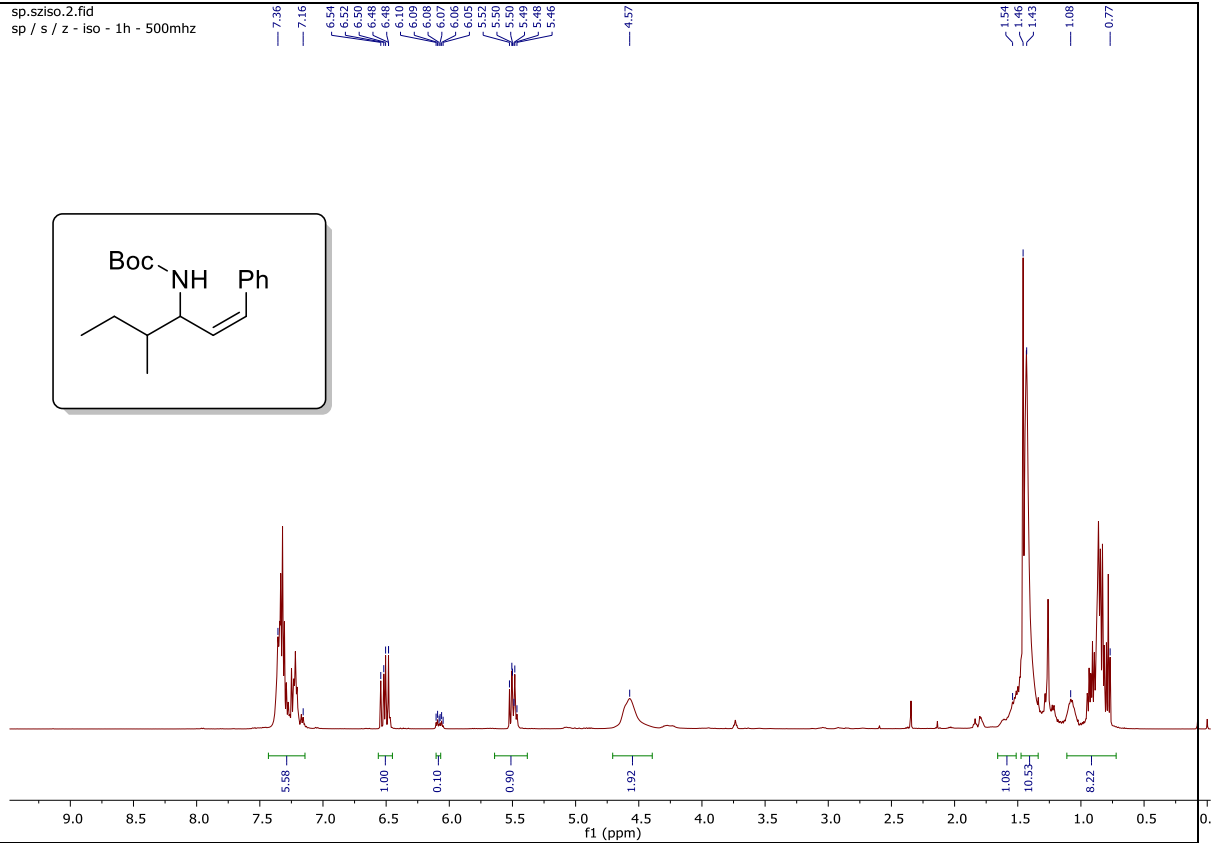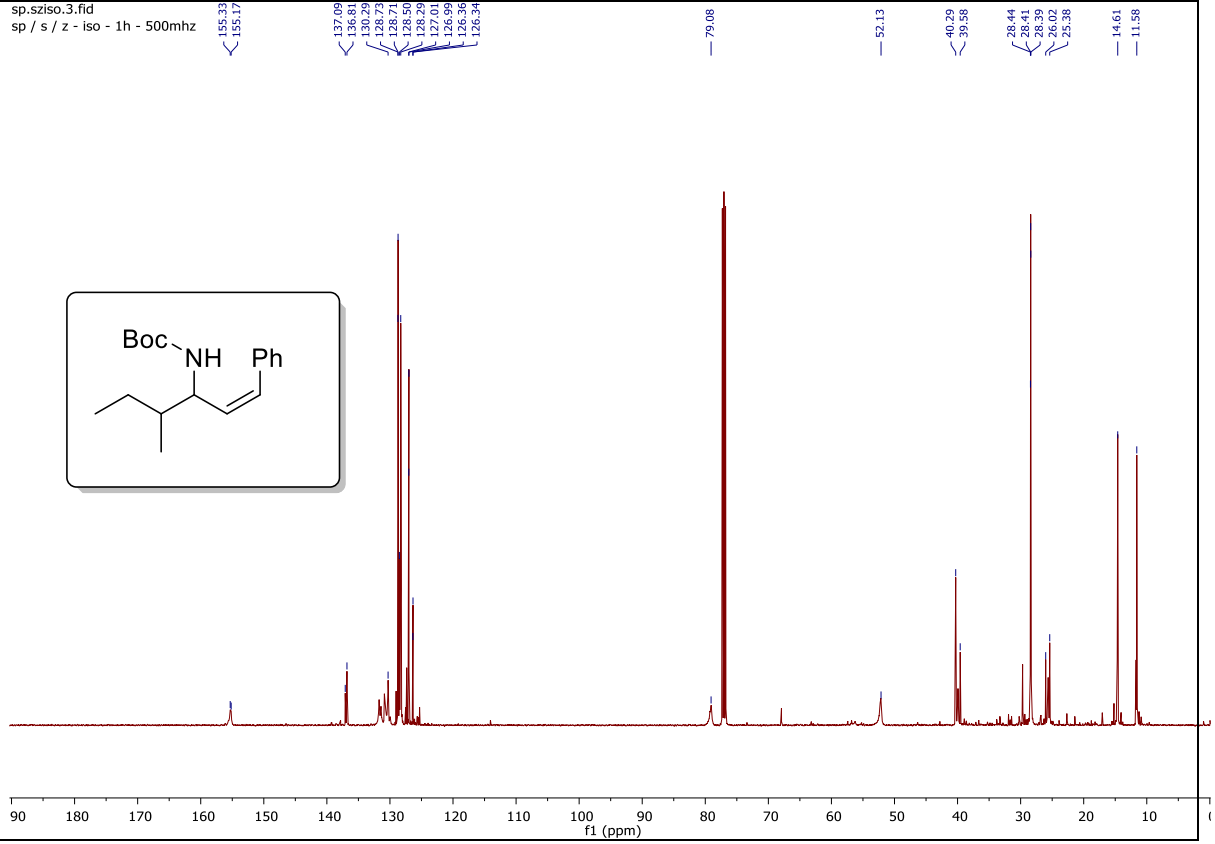

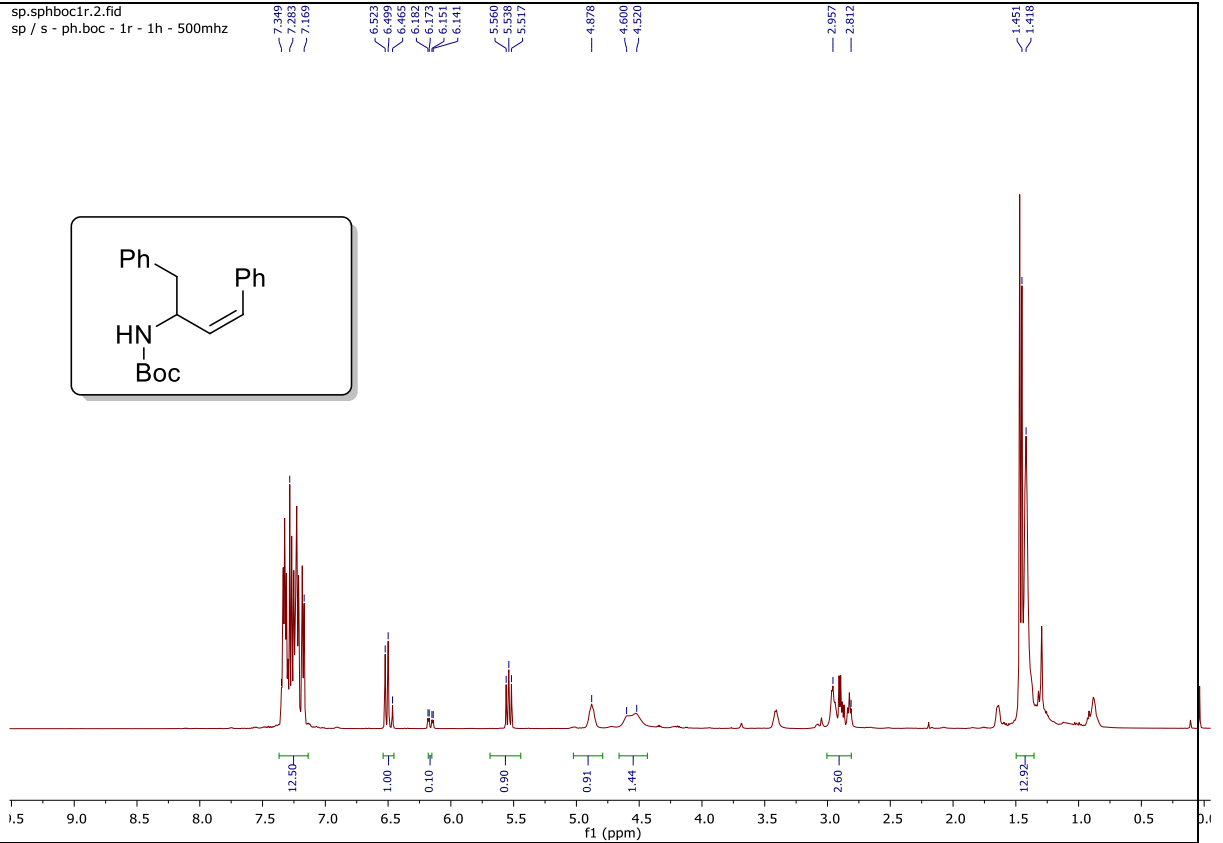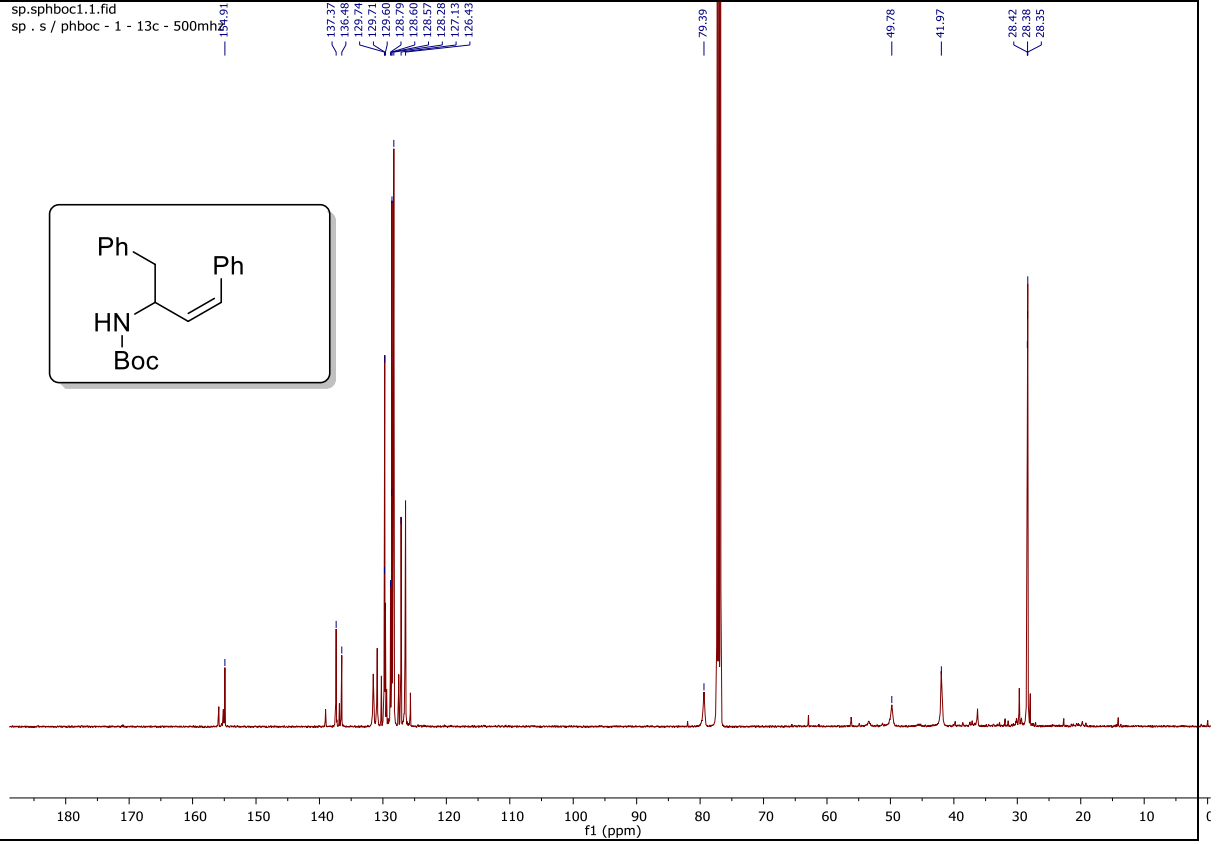

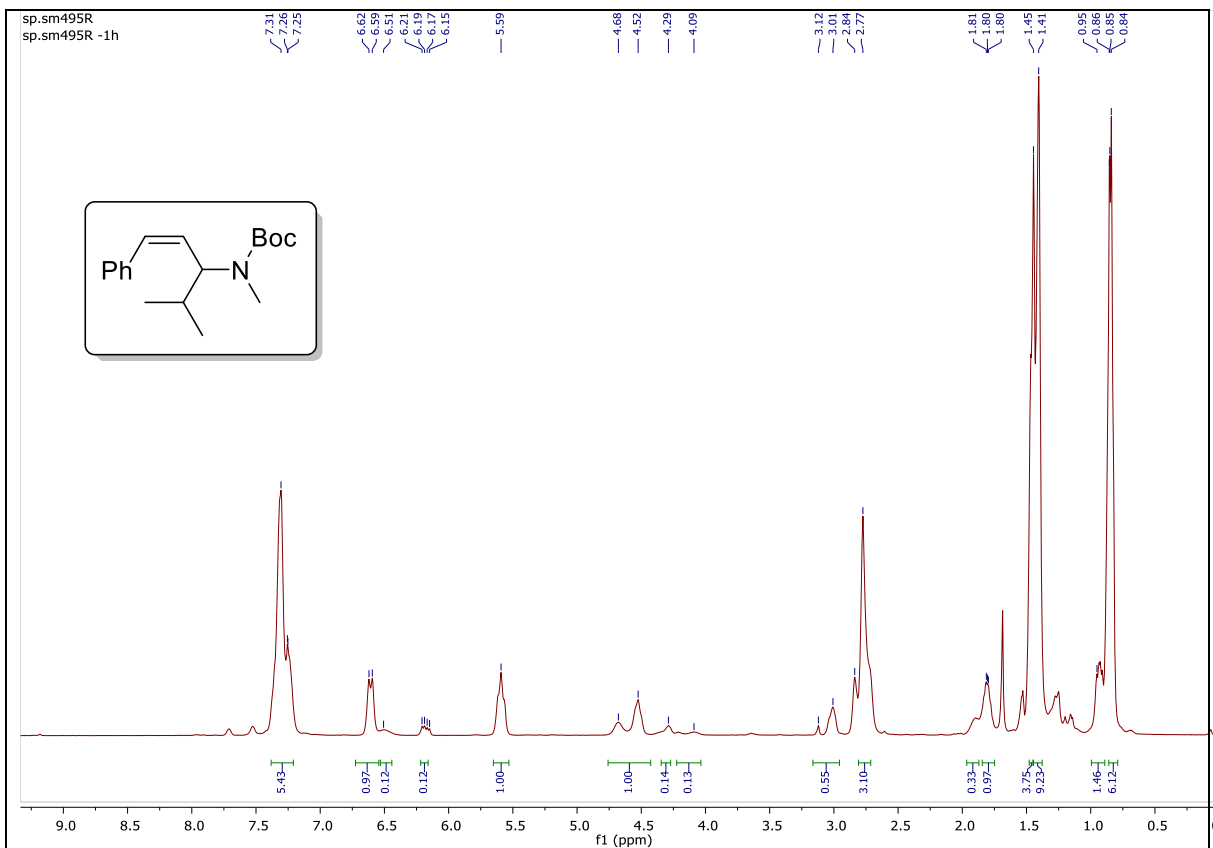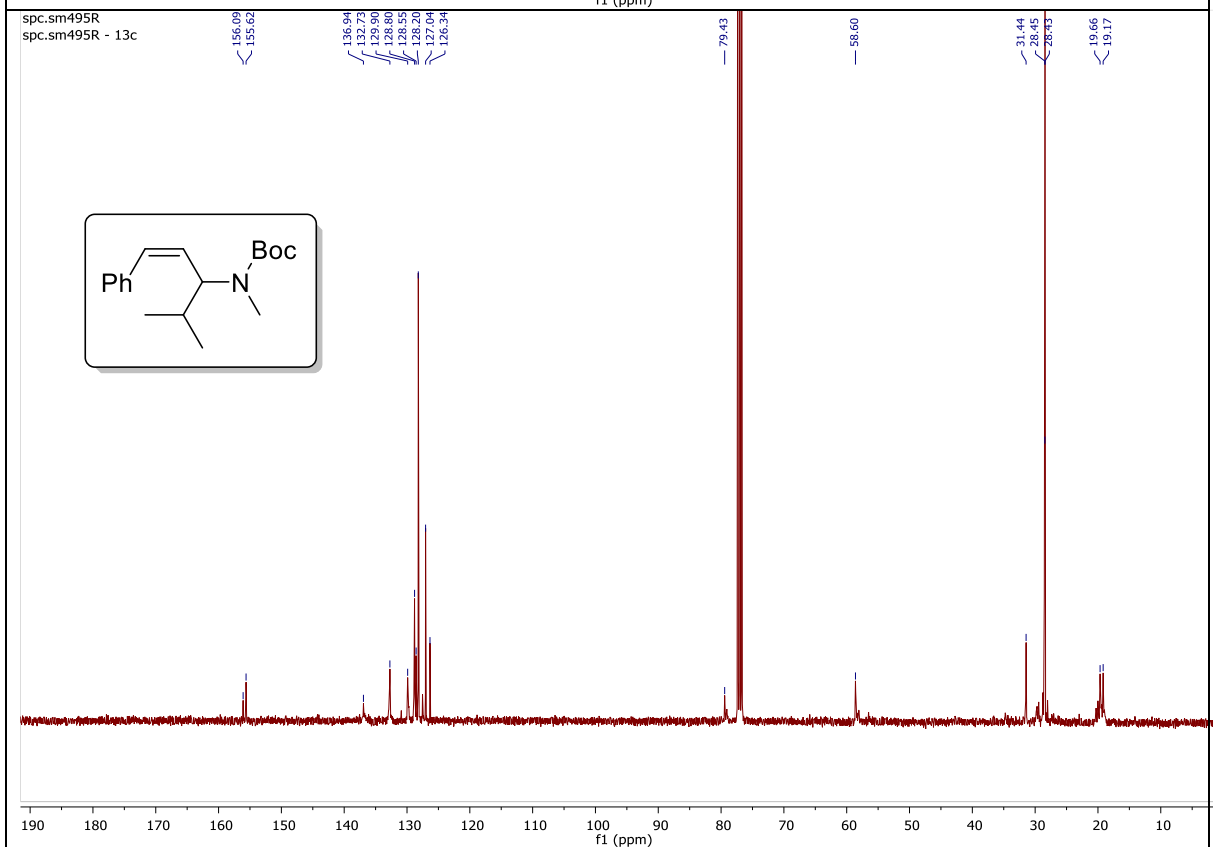

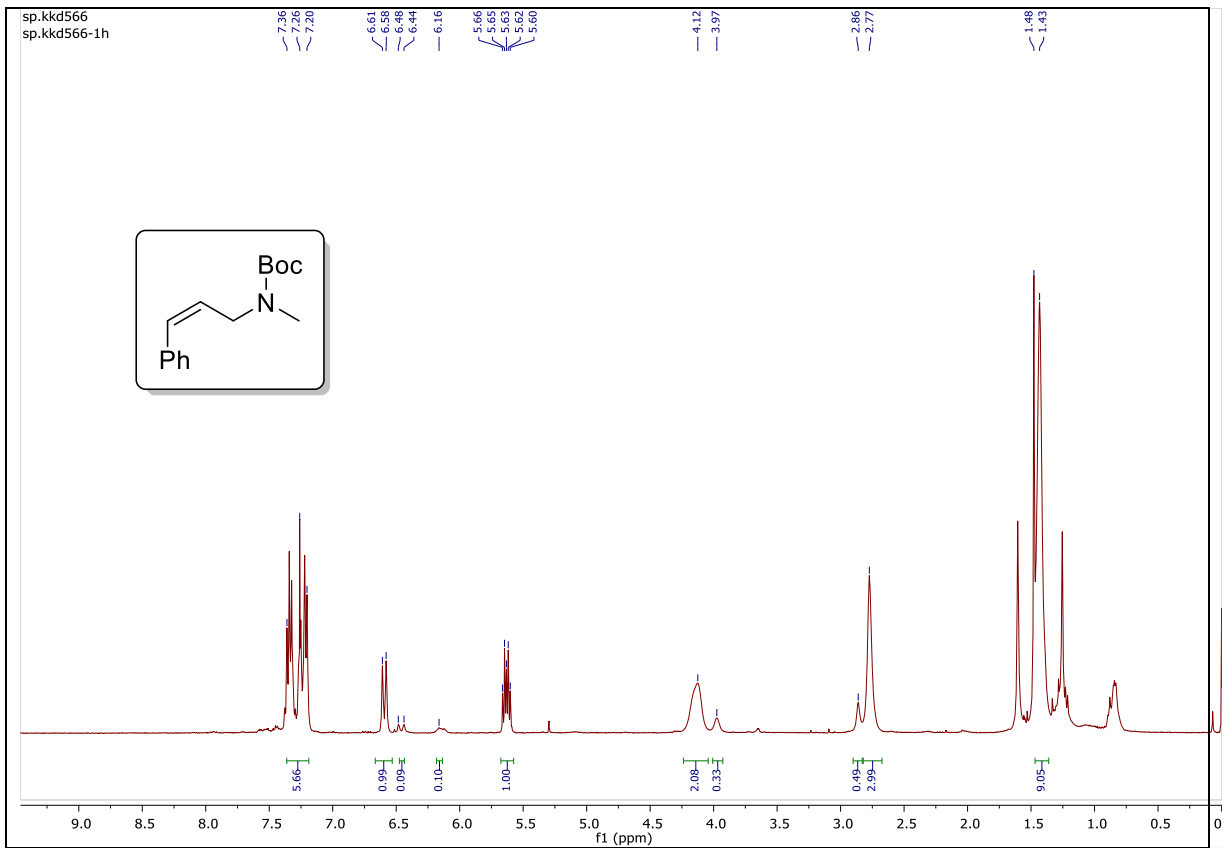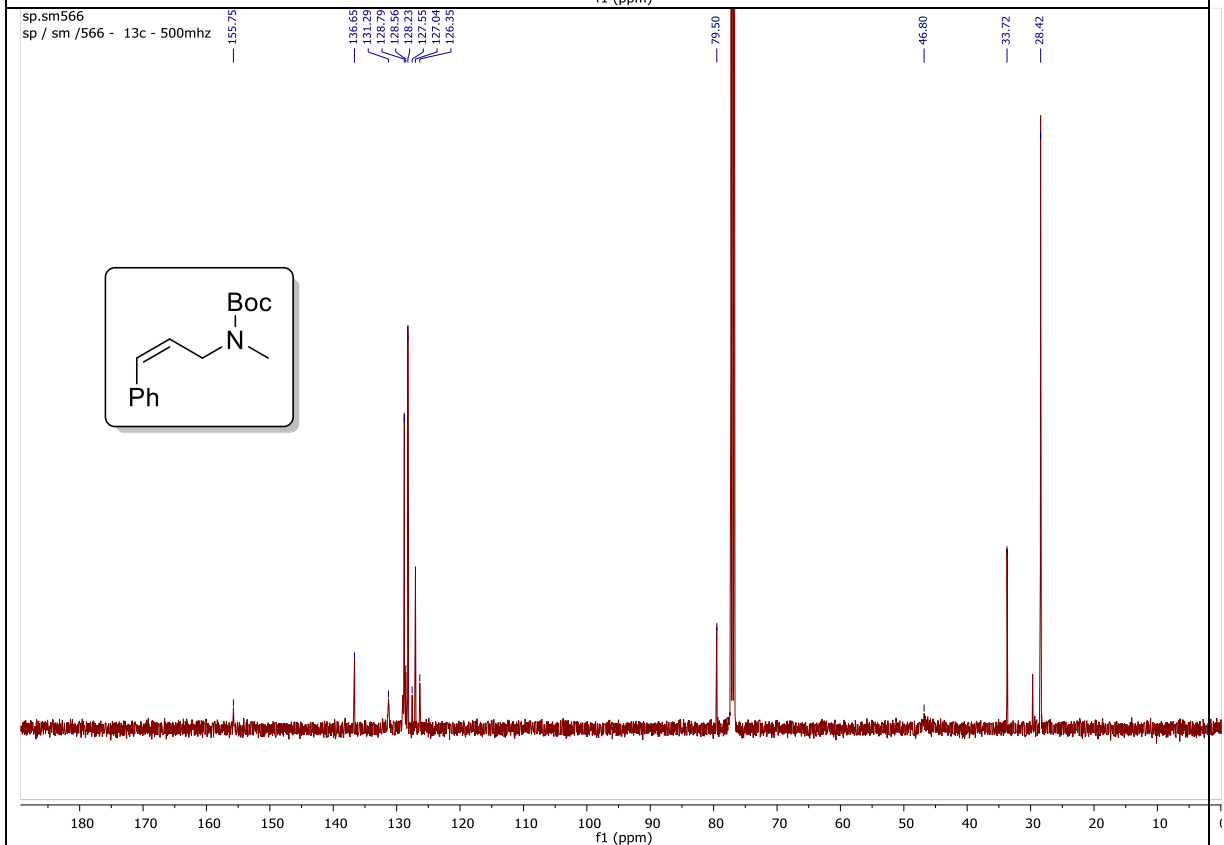

sp.sm-1188  
sp.sm-1188 -400Mhz

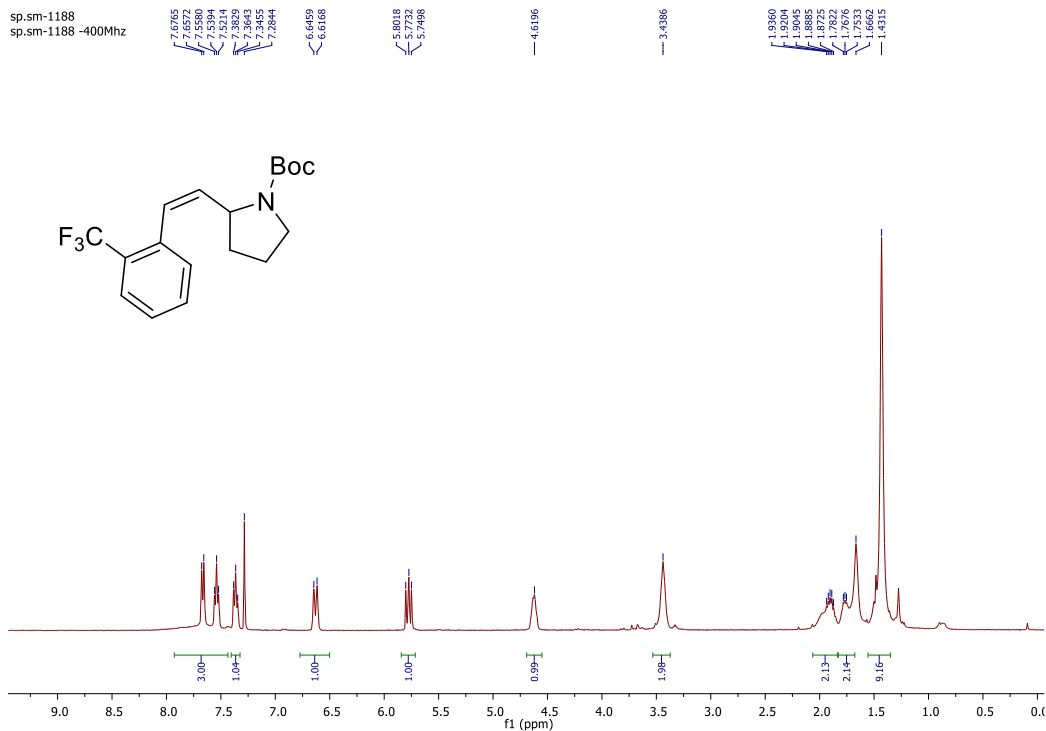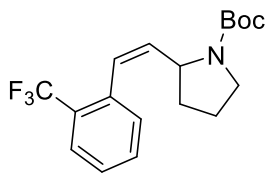

sp.sm1188  
sp / sm / 1188 - 13c - 500mhz

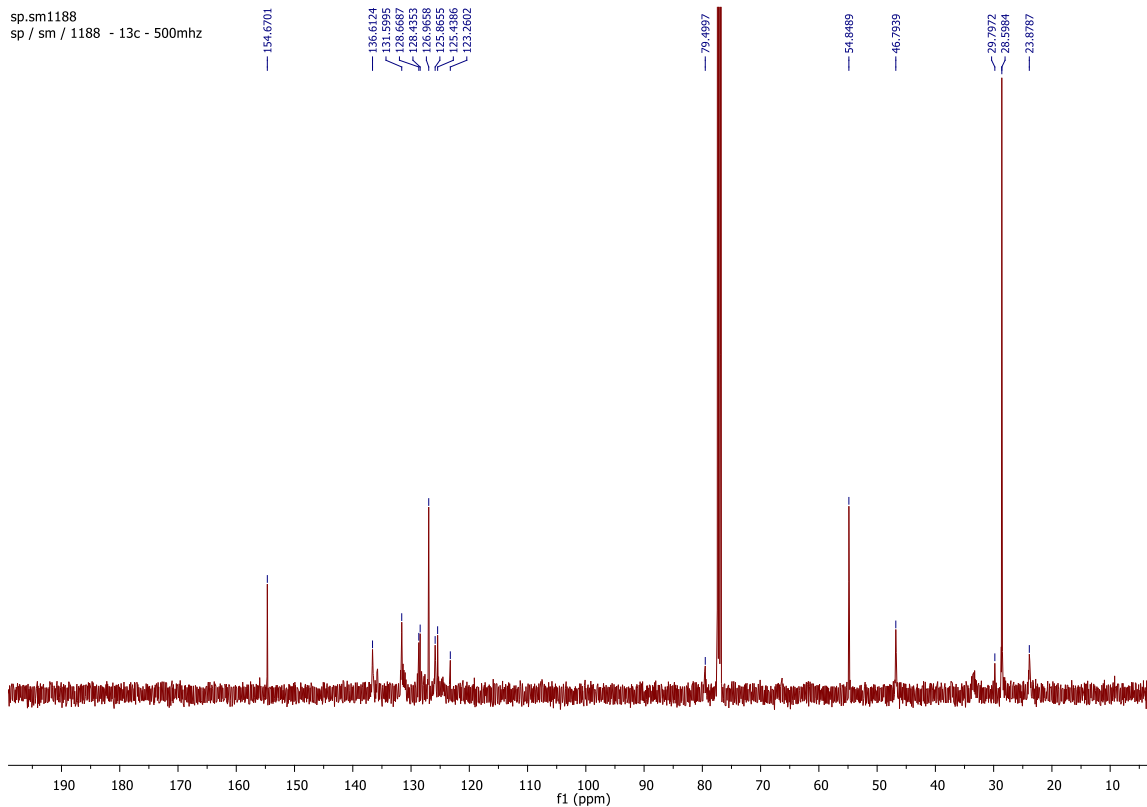



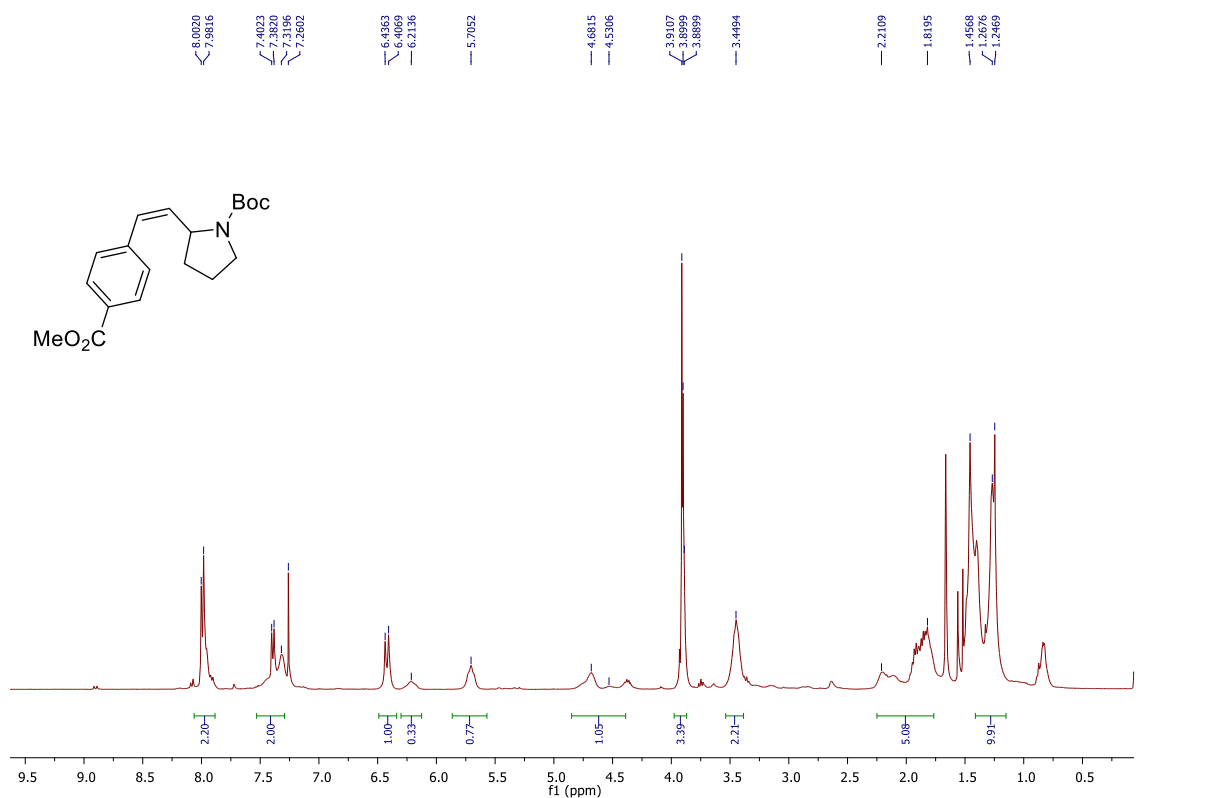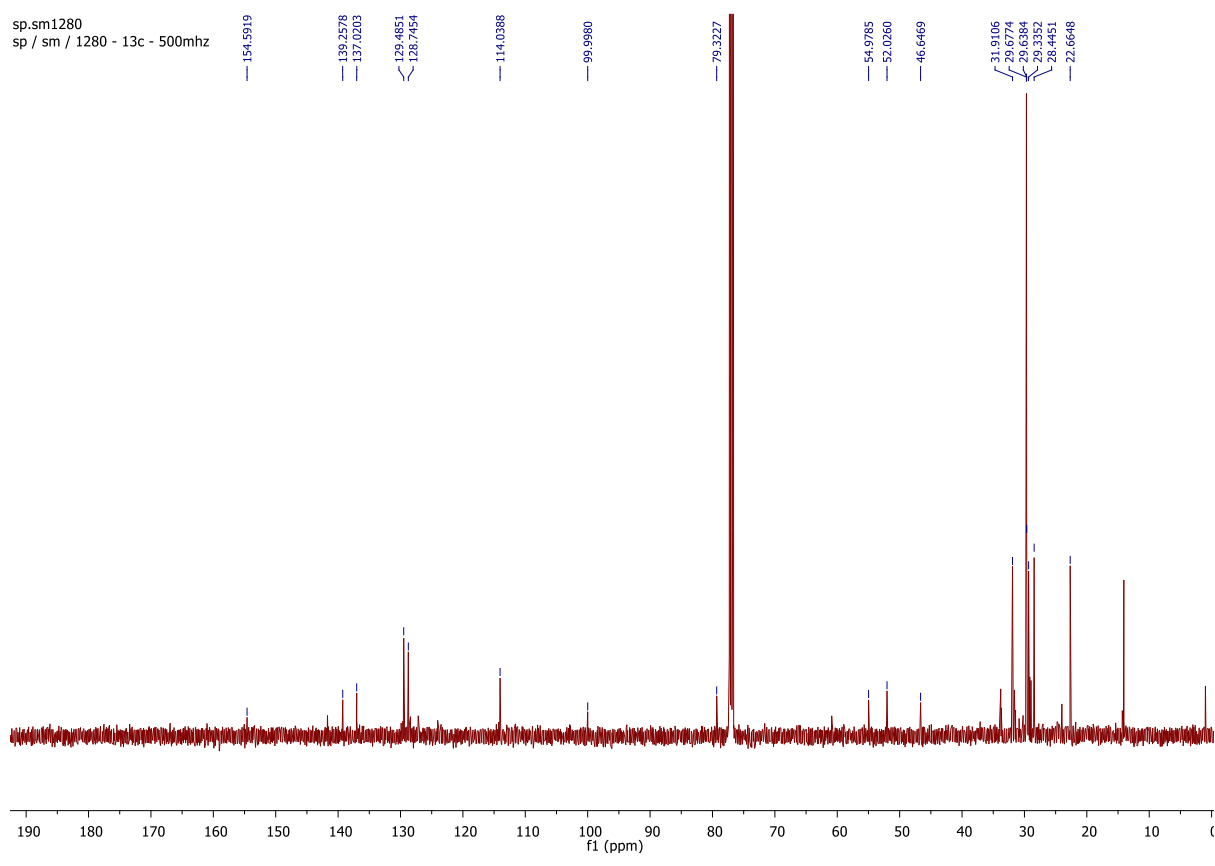

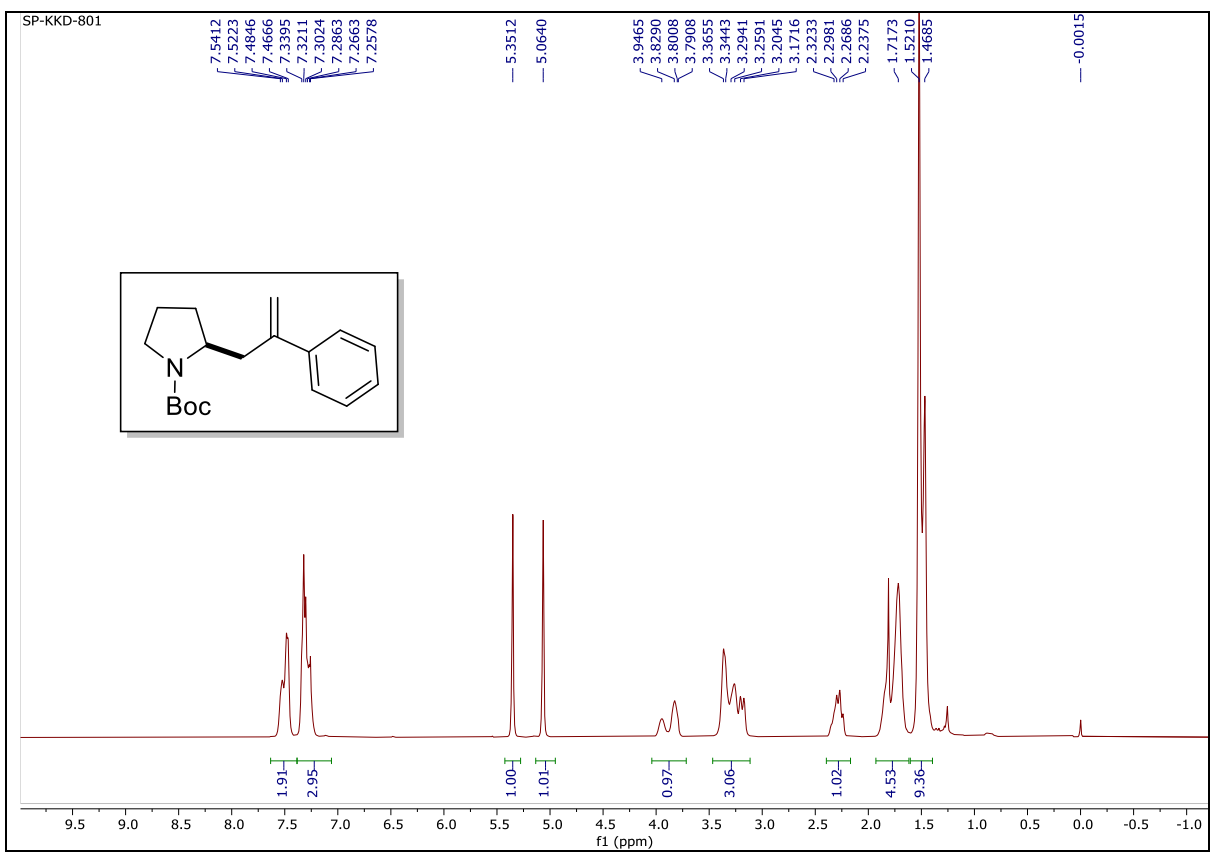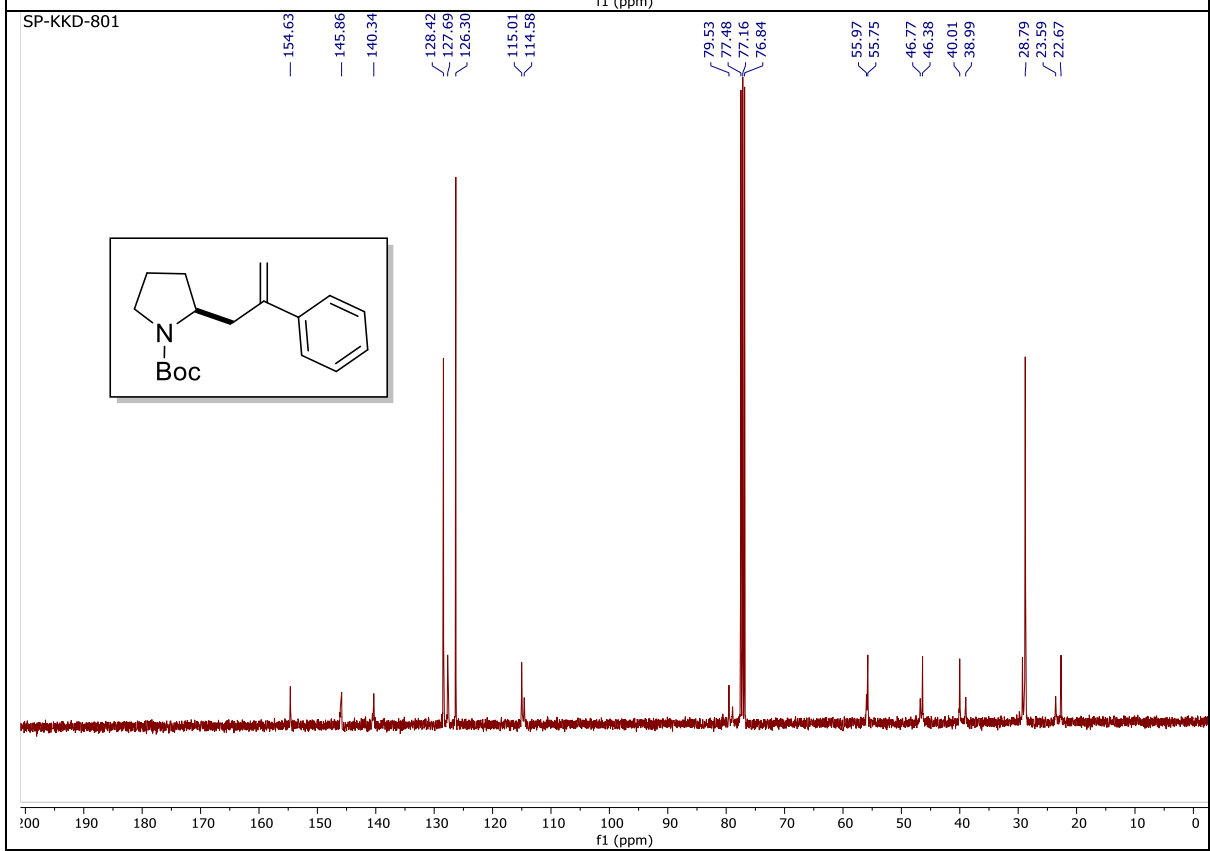

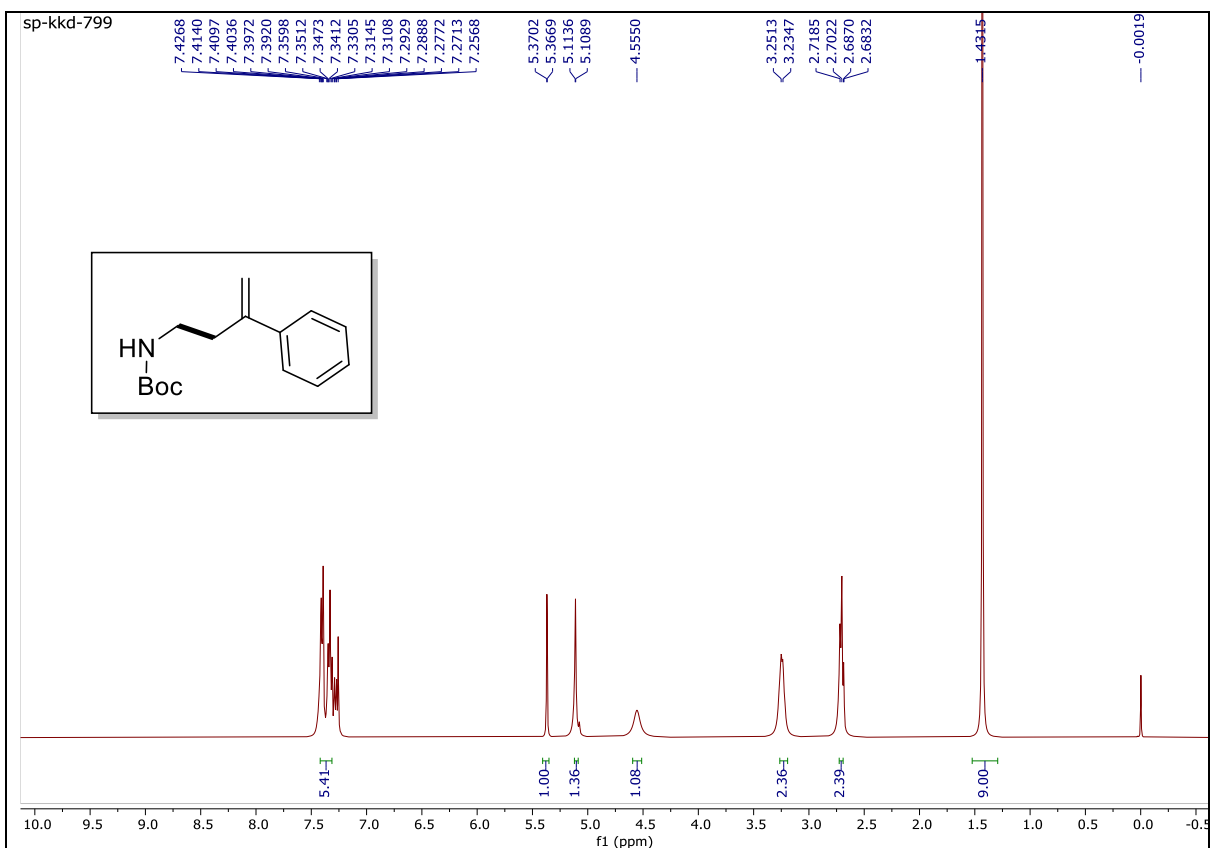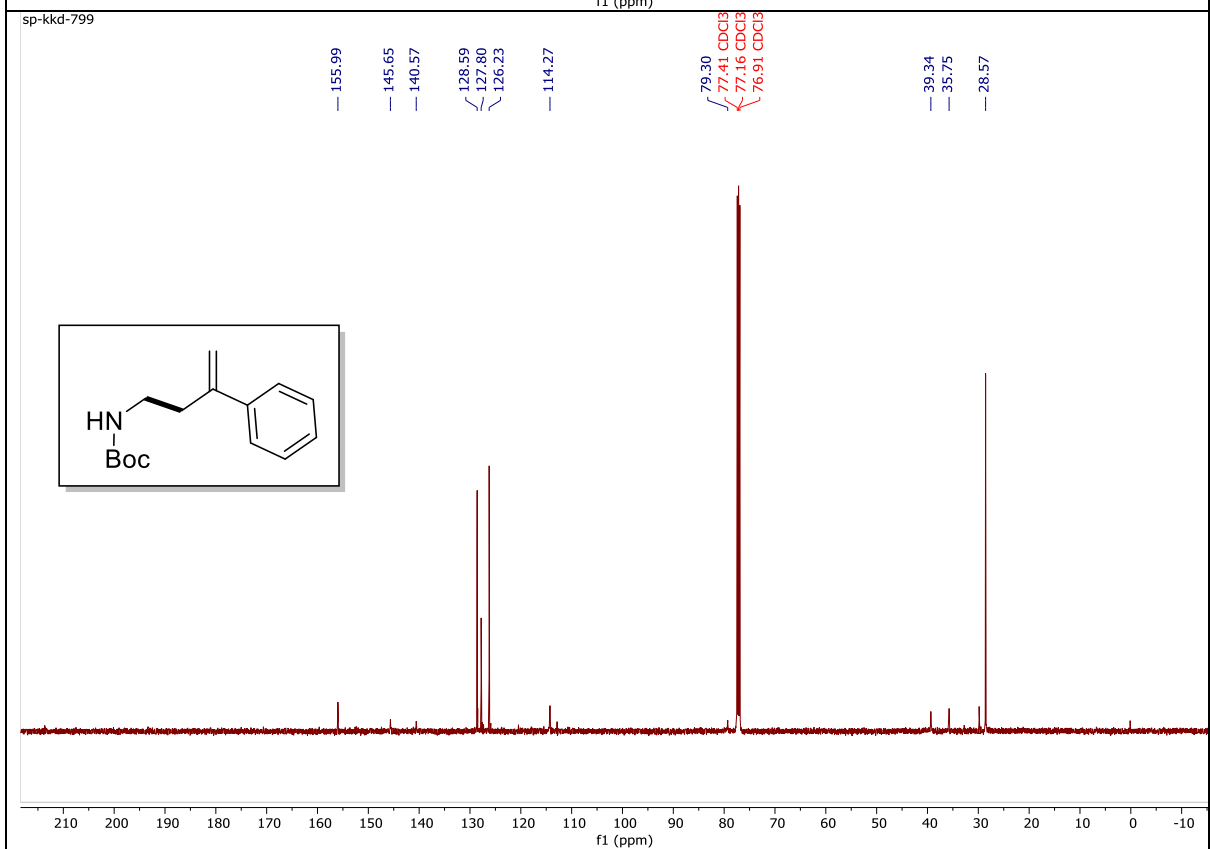

SP-KKD-798

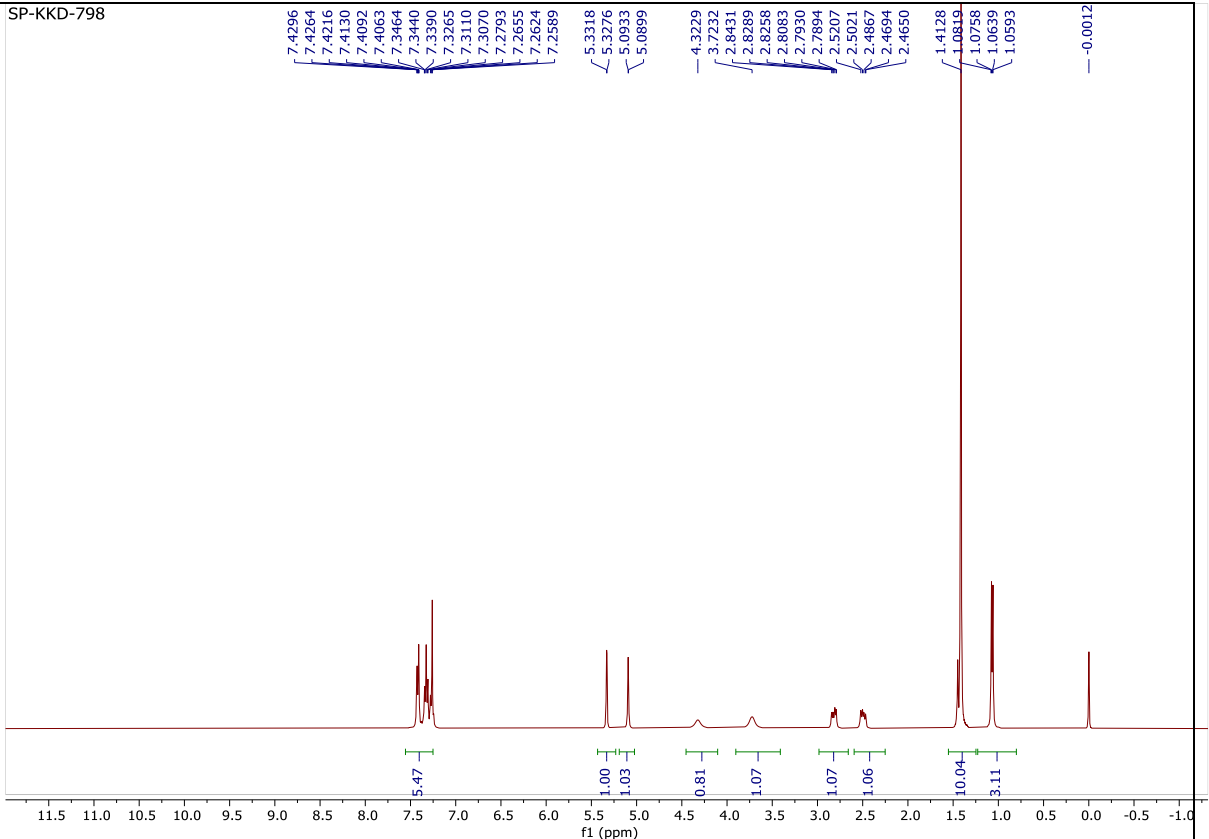

SP-KKD-798

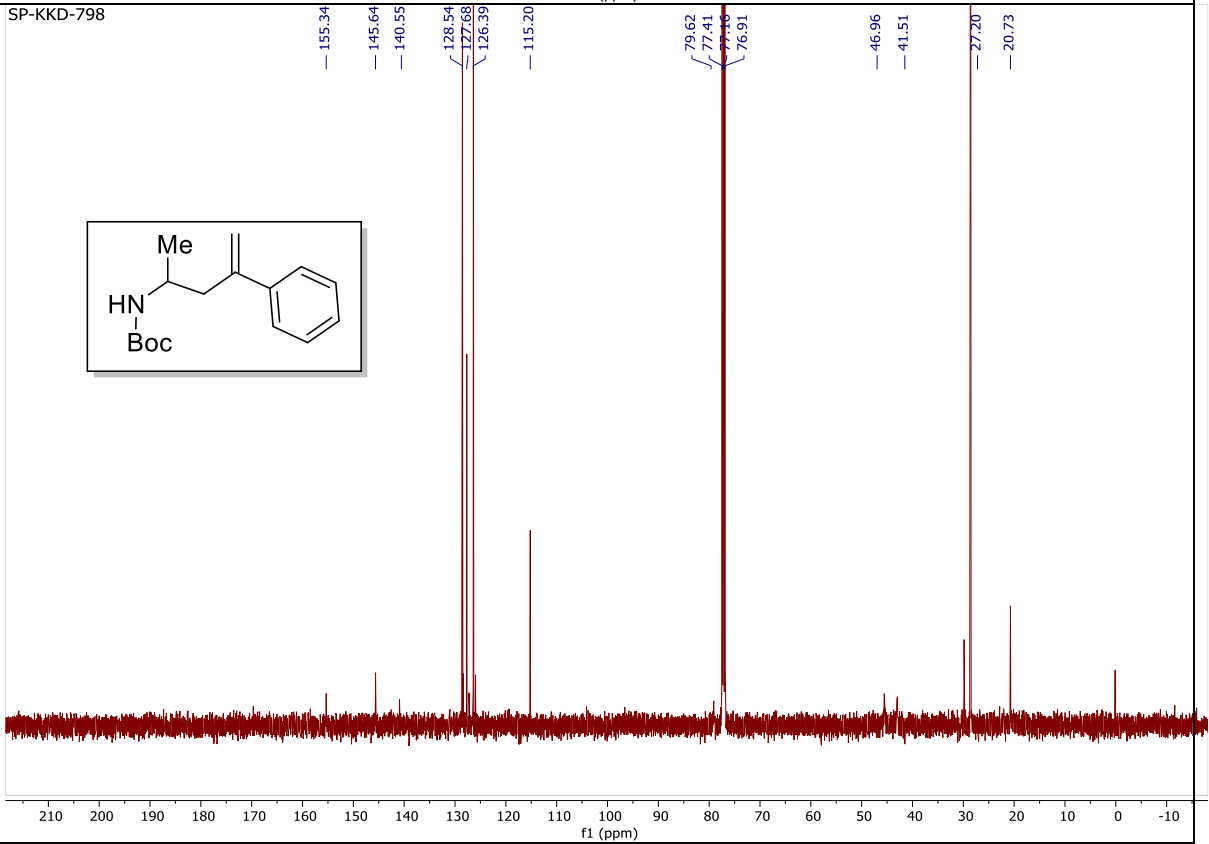

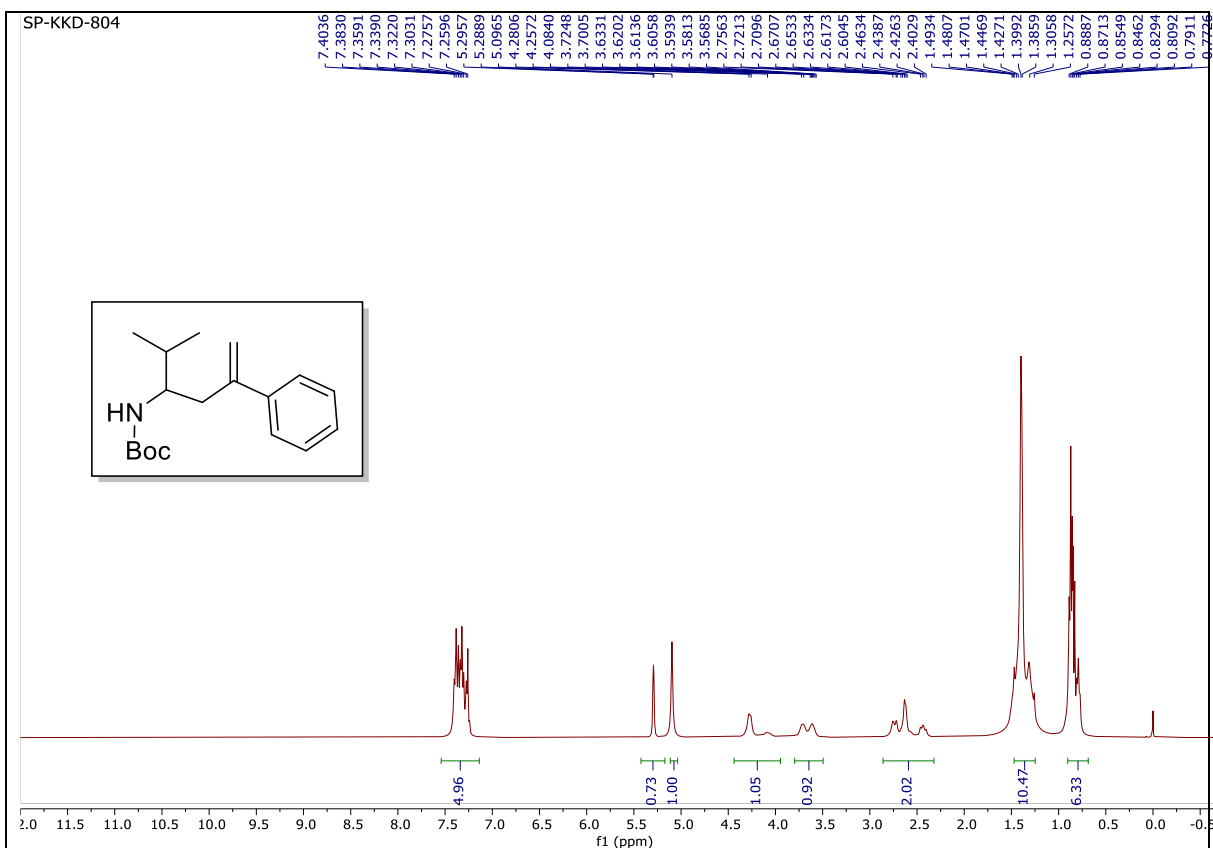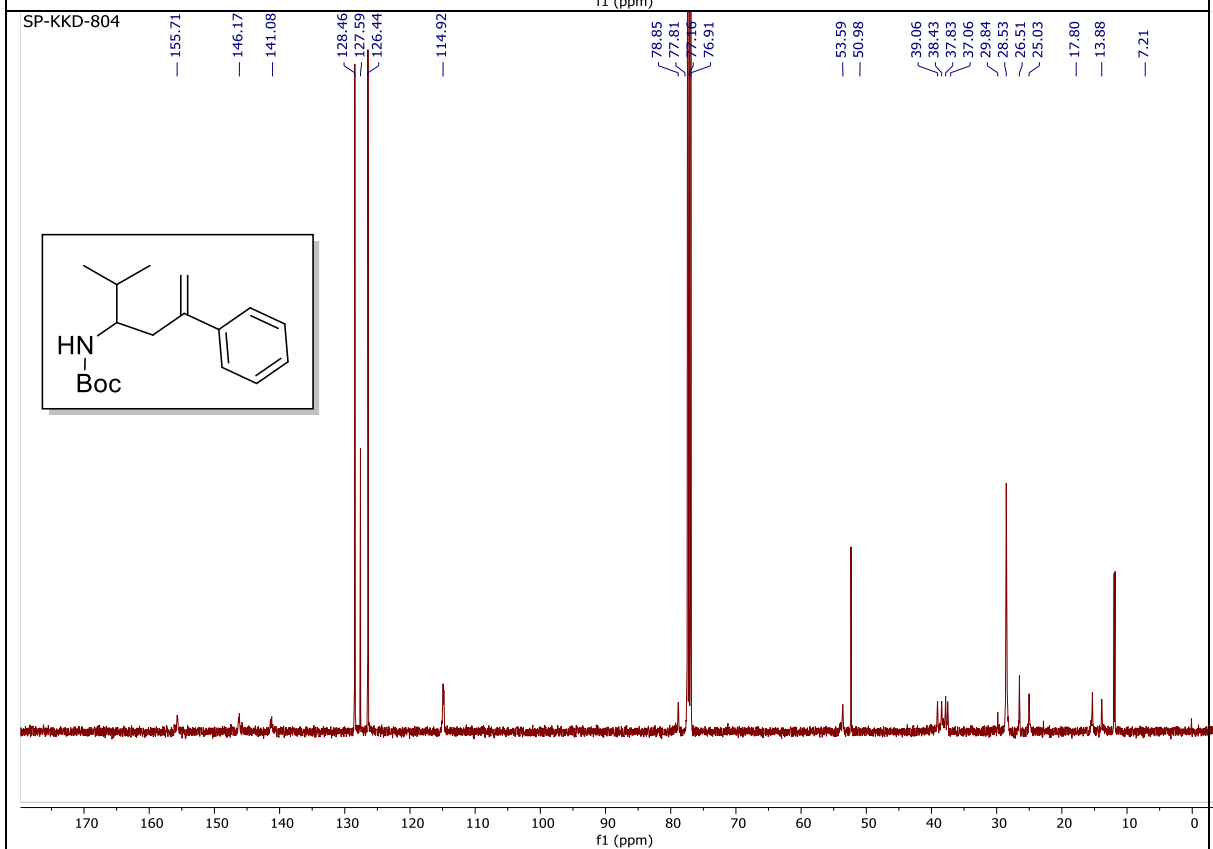

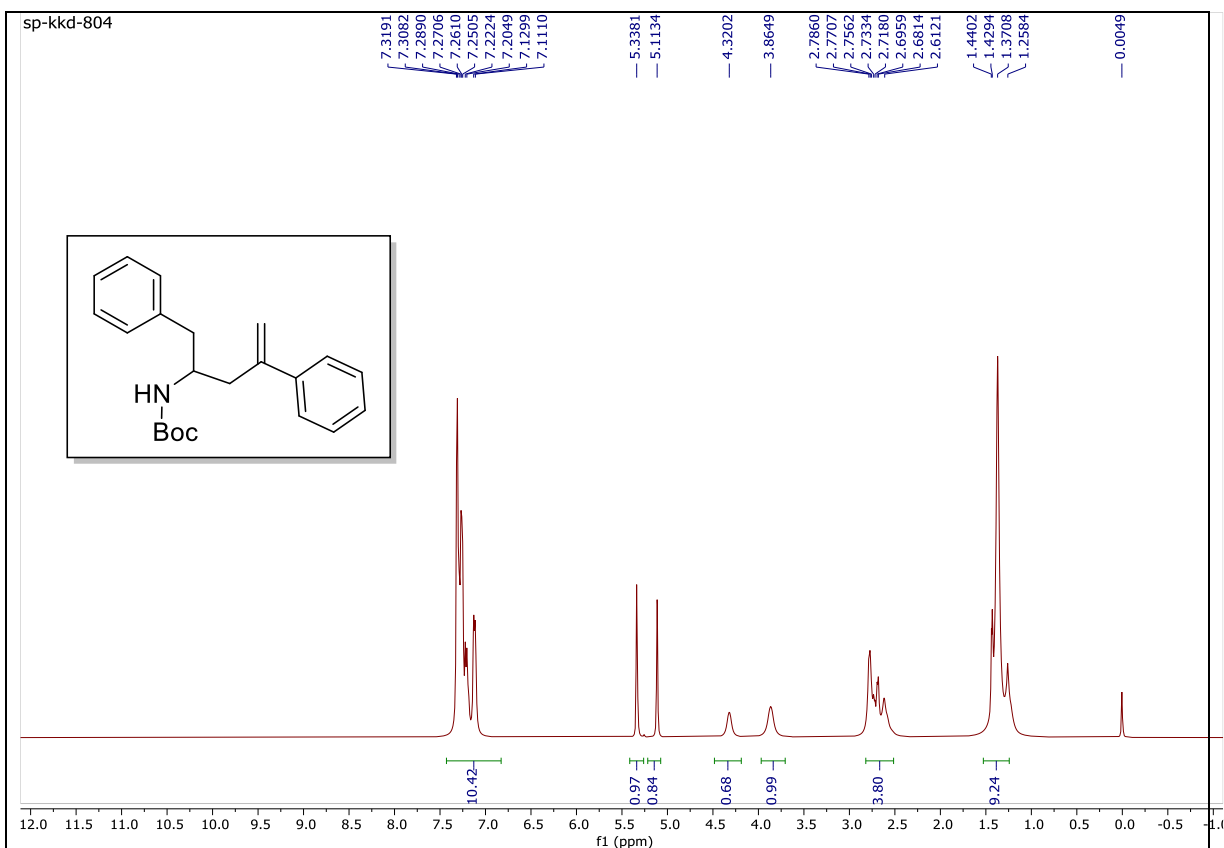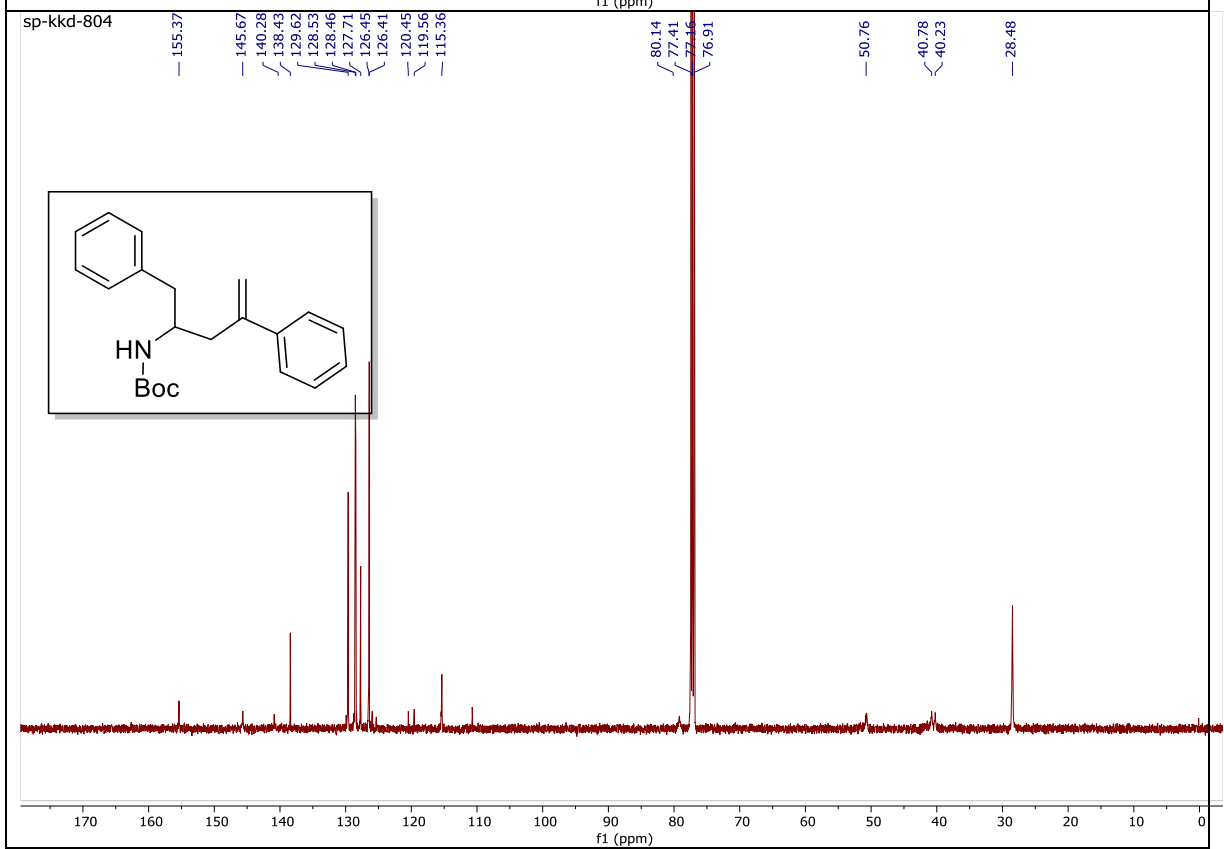

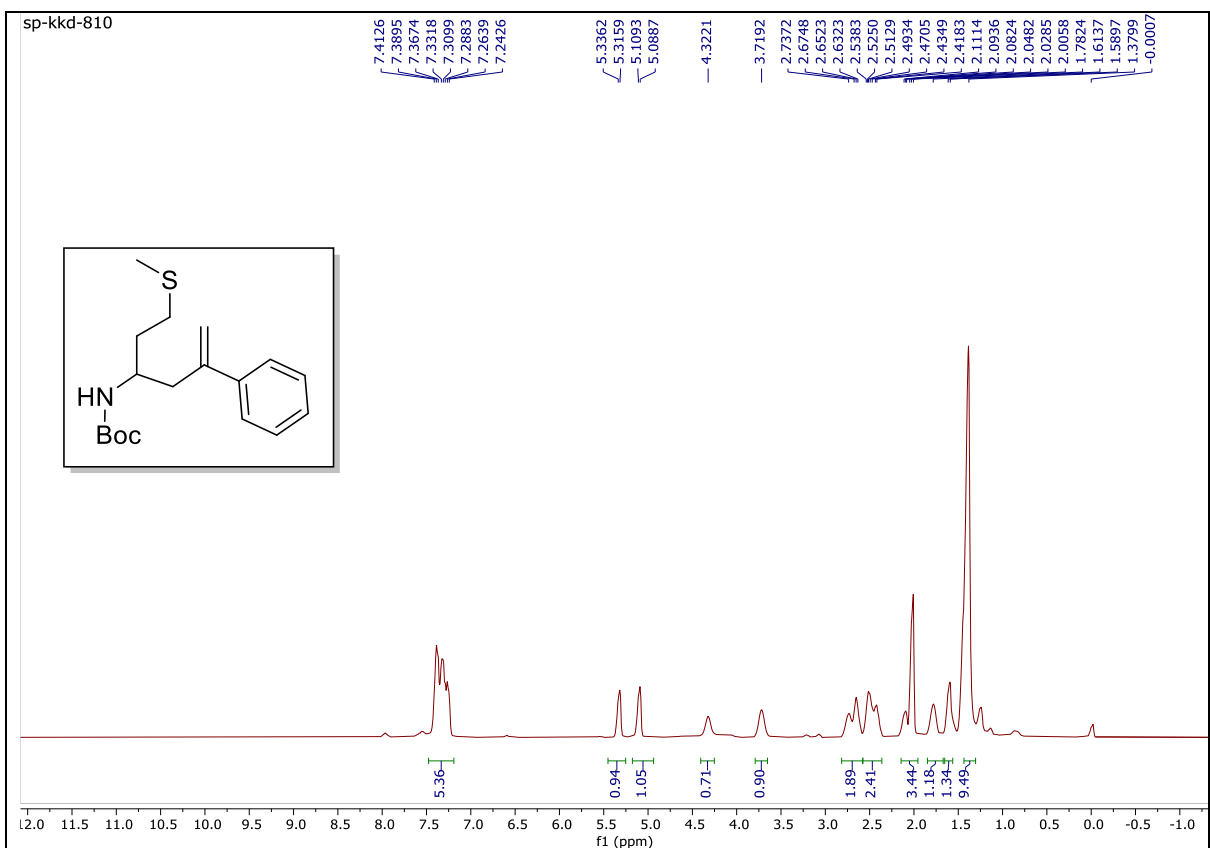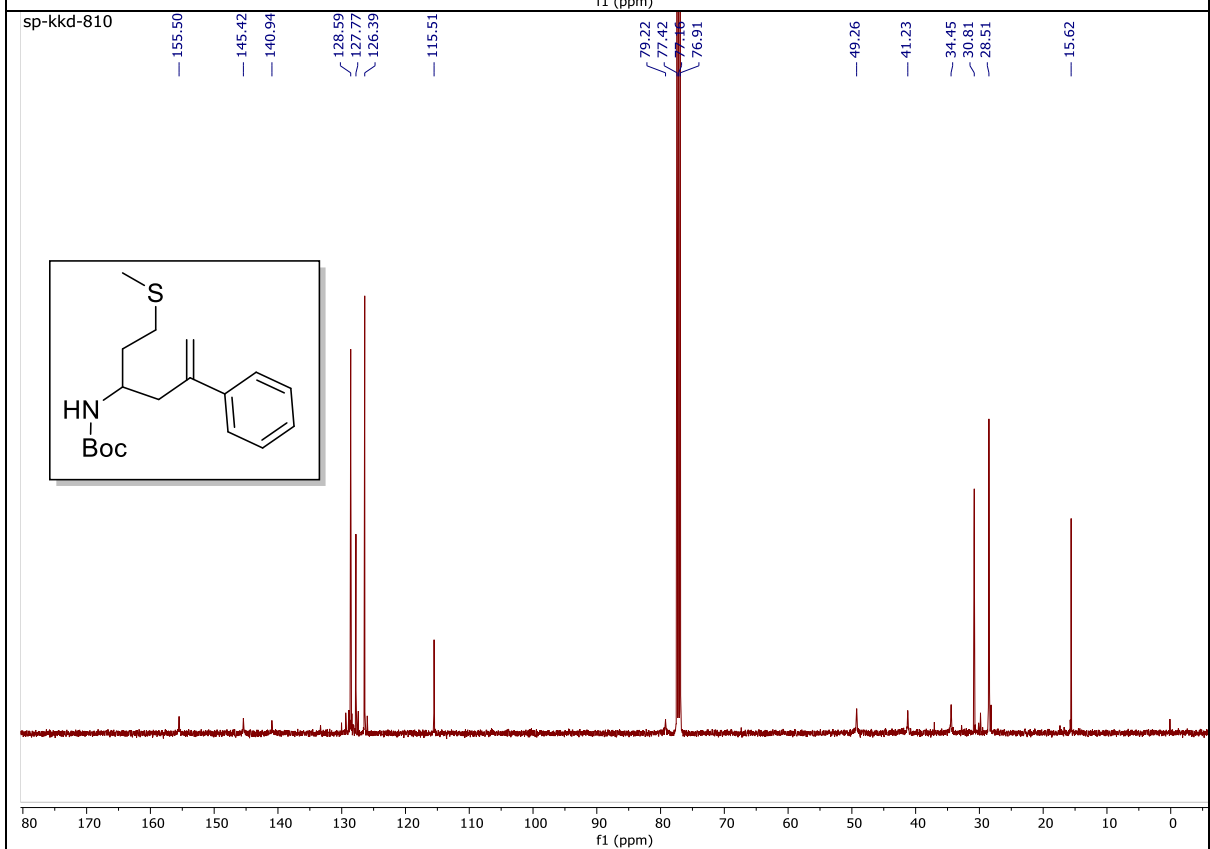

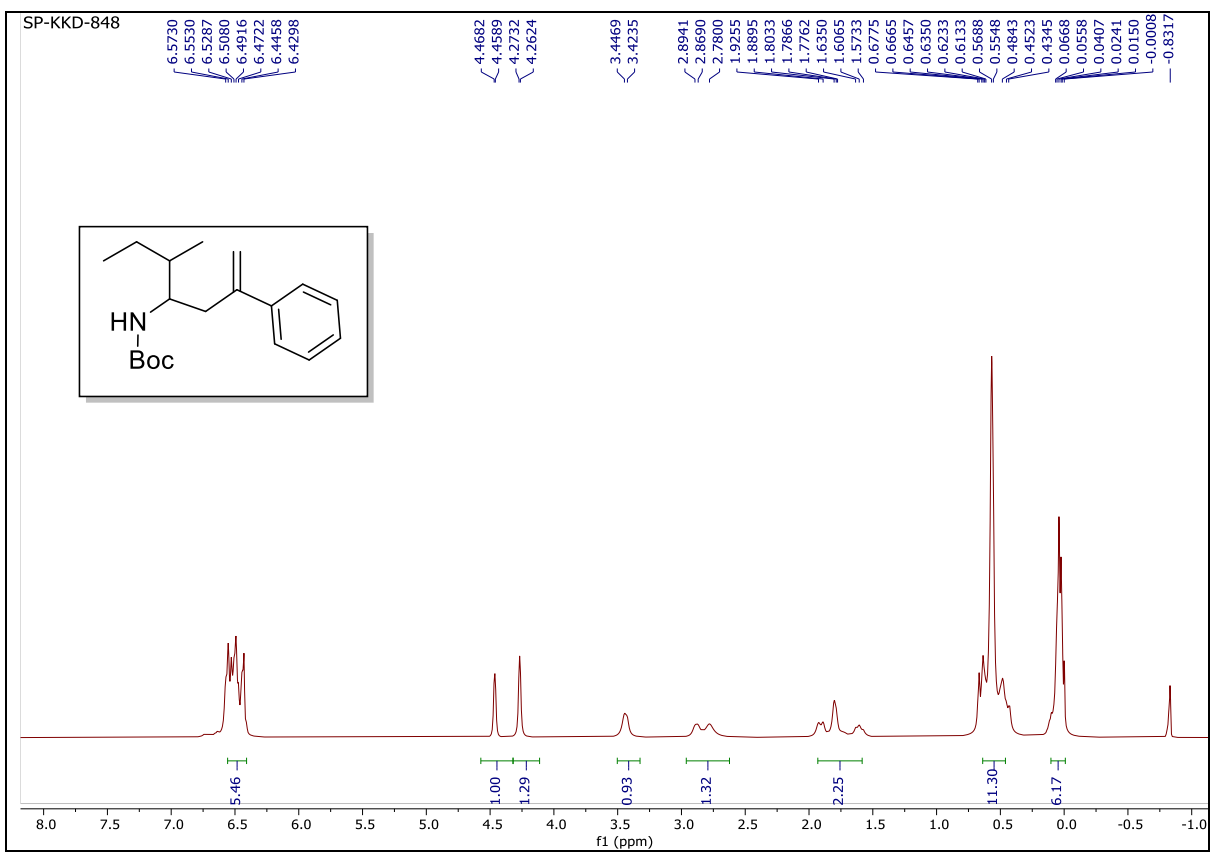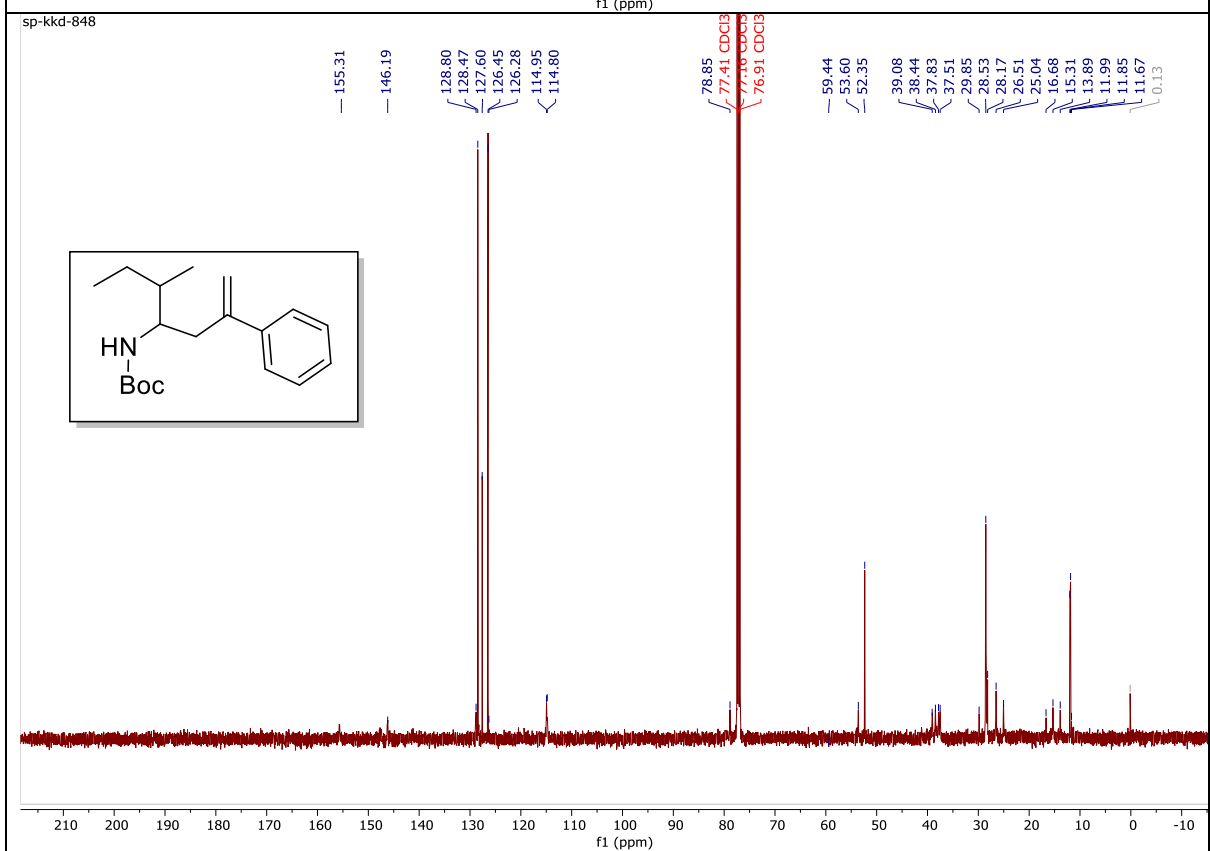



sp-kkd-849

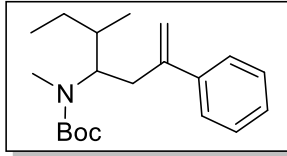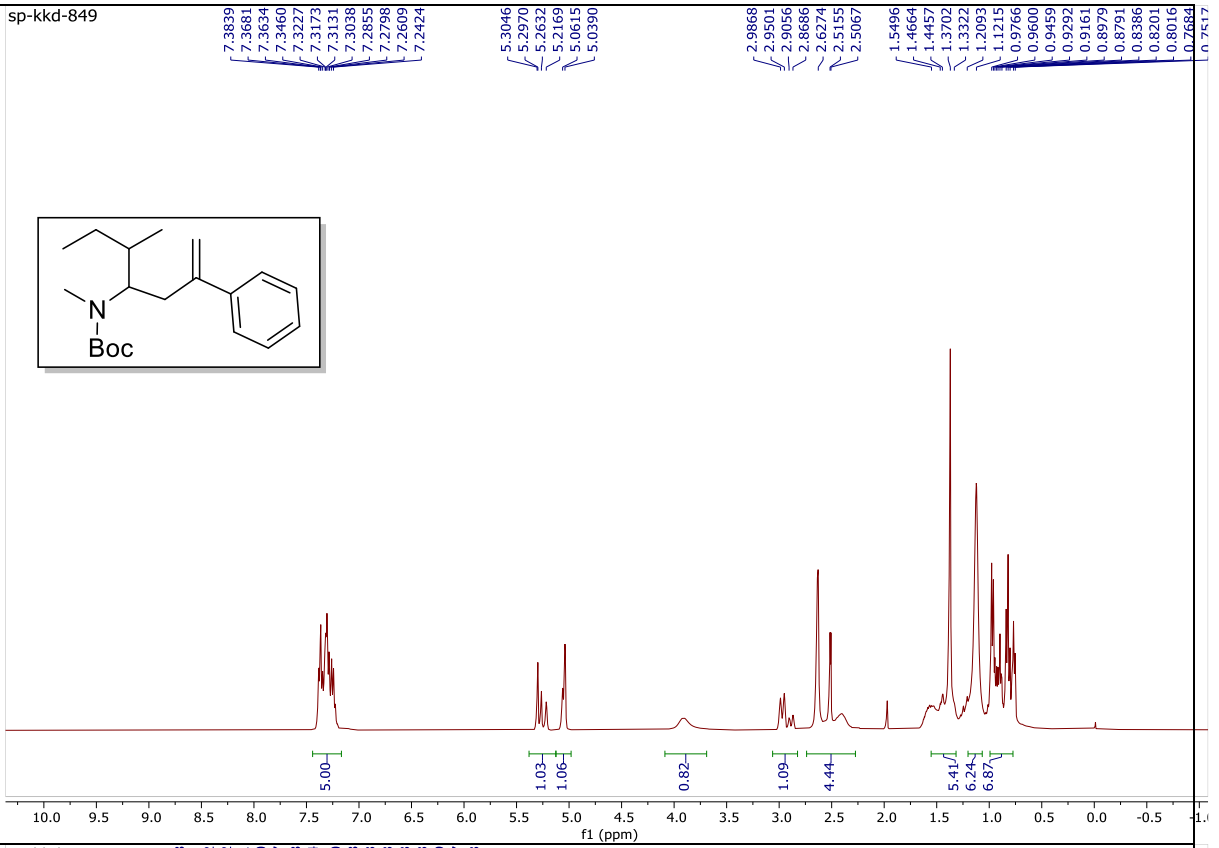

sp-kkd-849

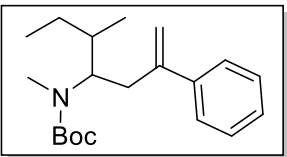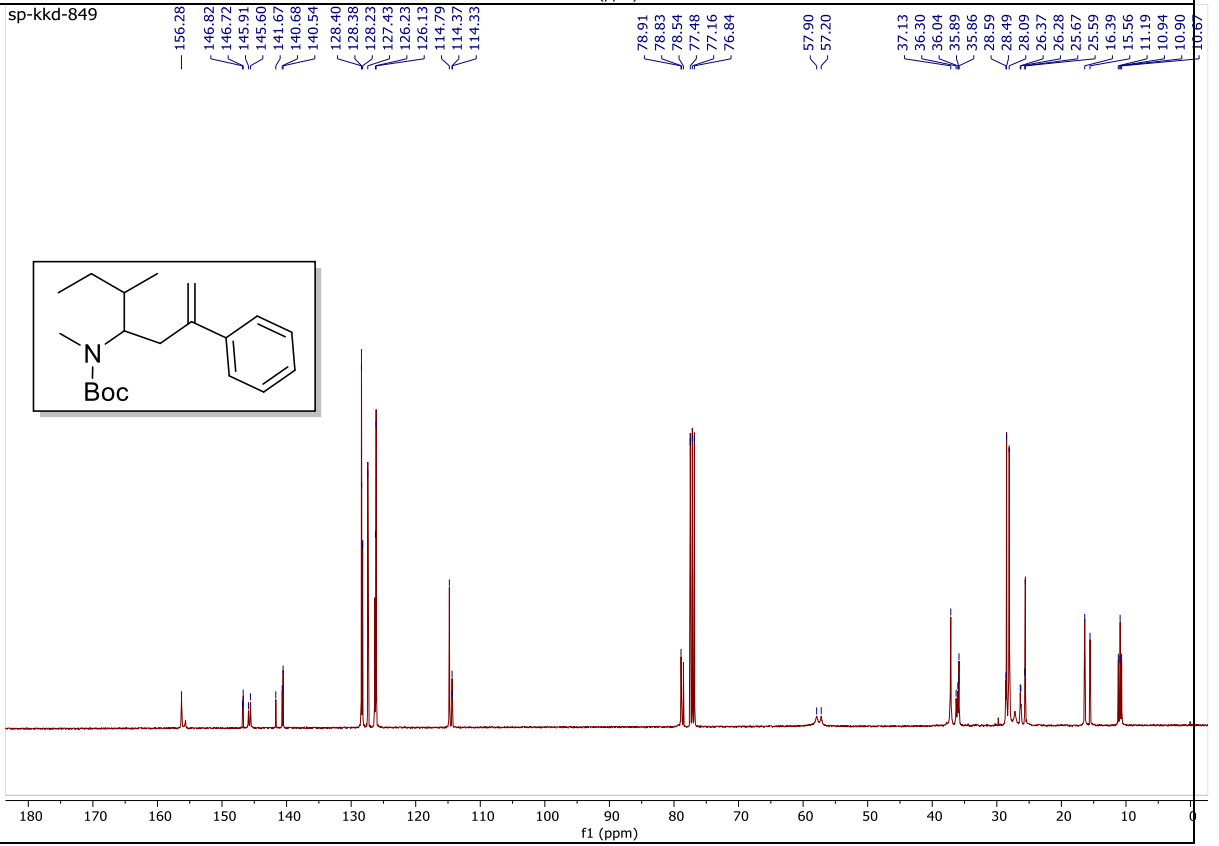

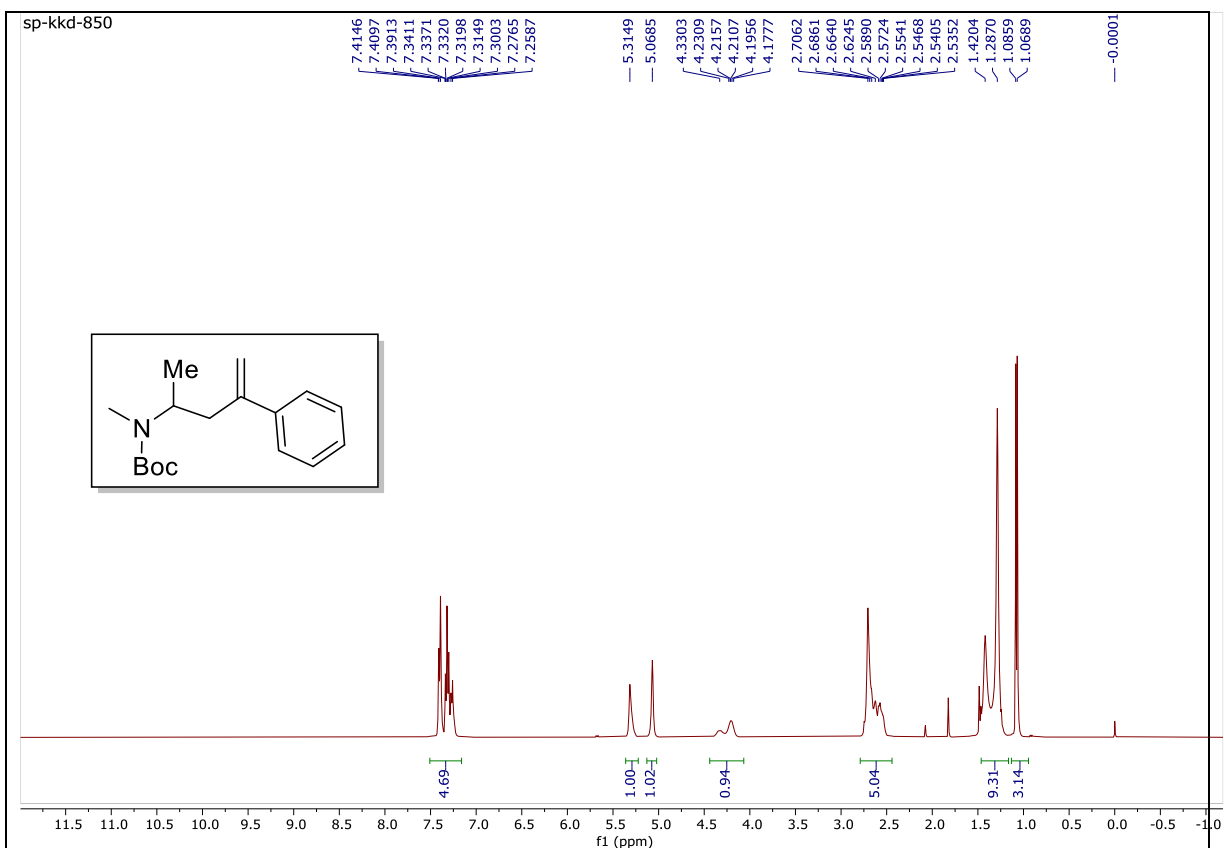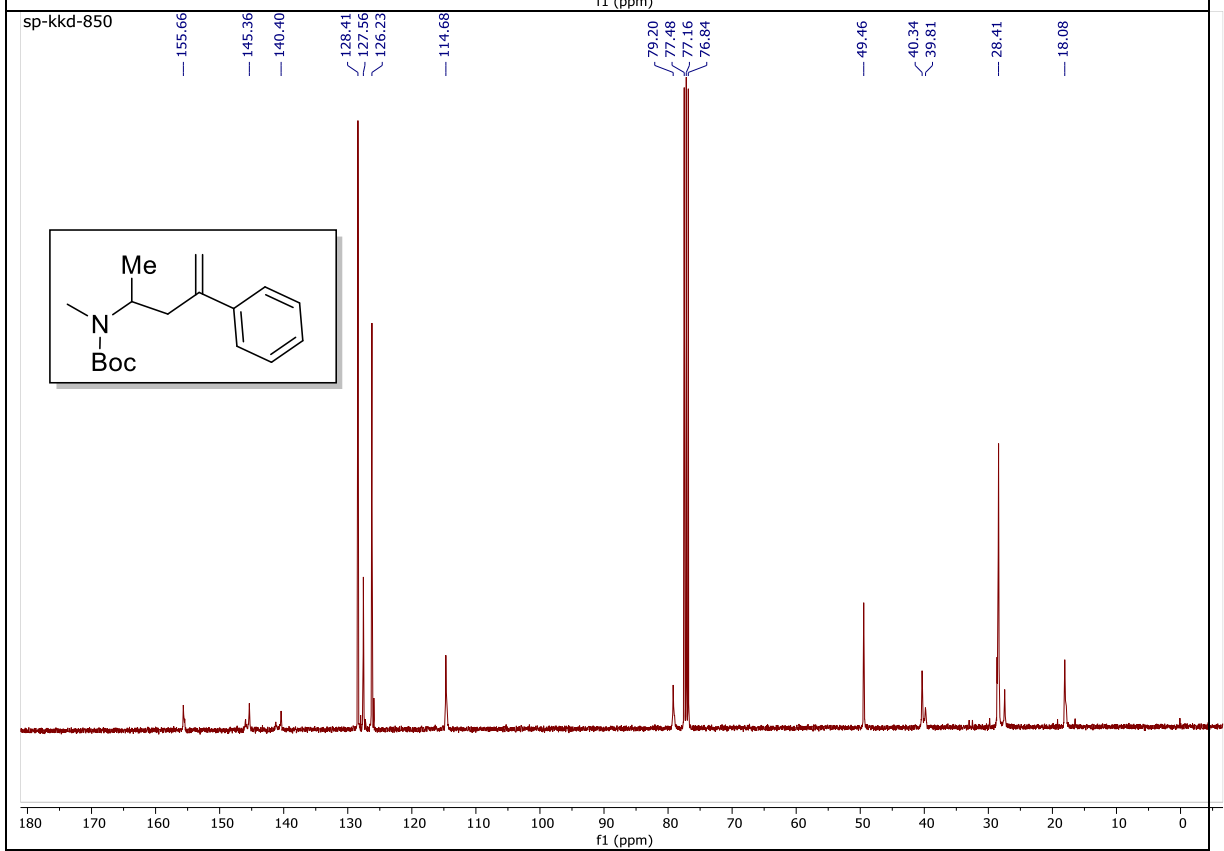

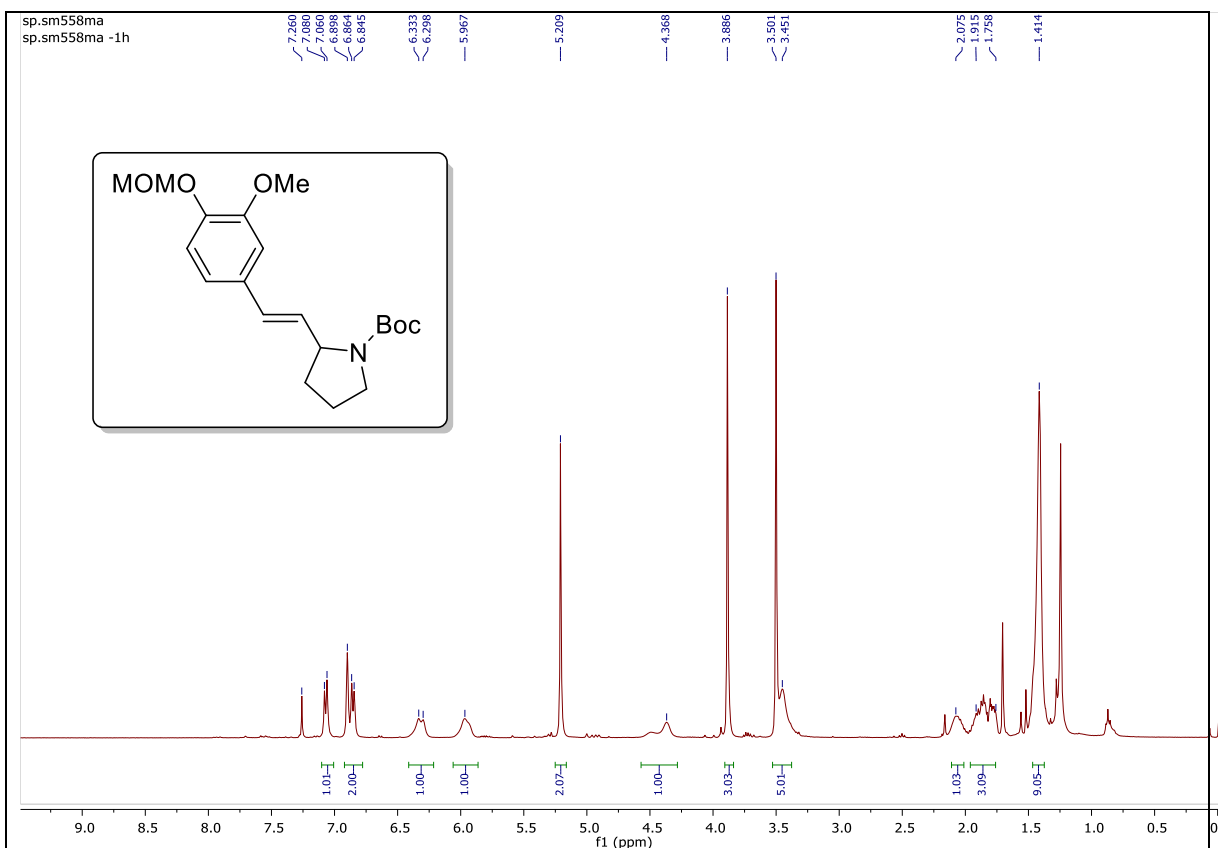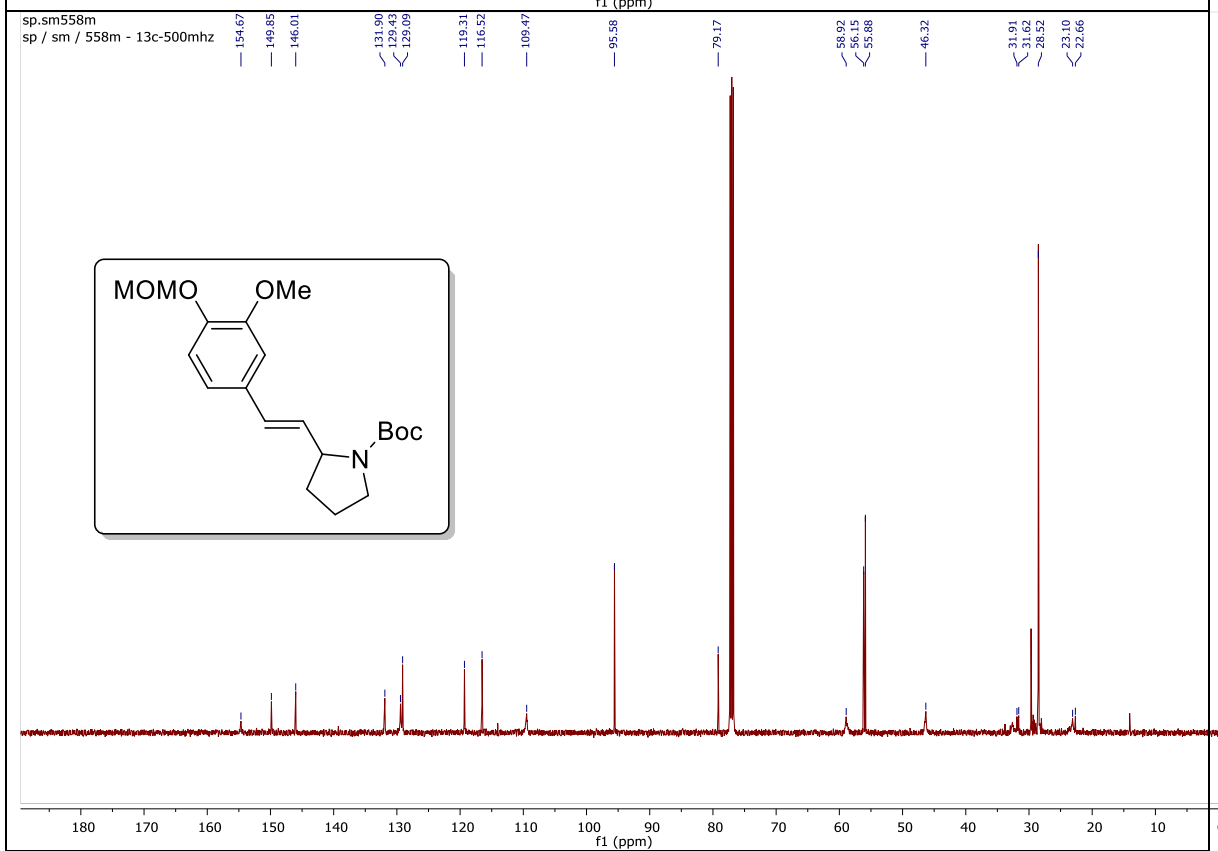

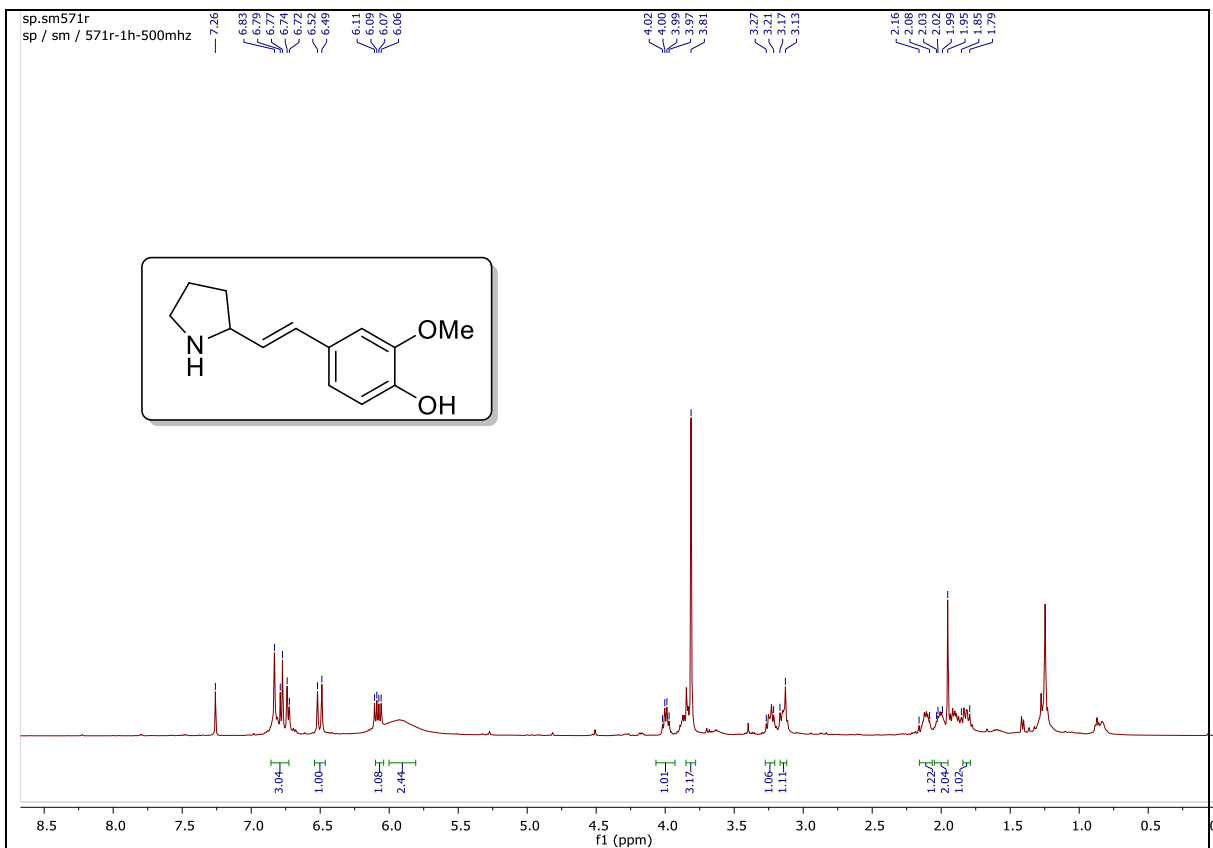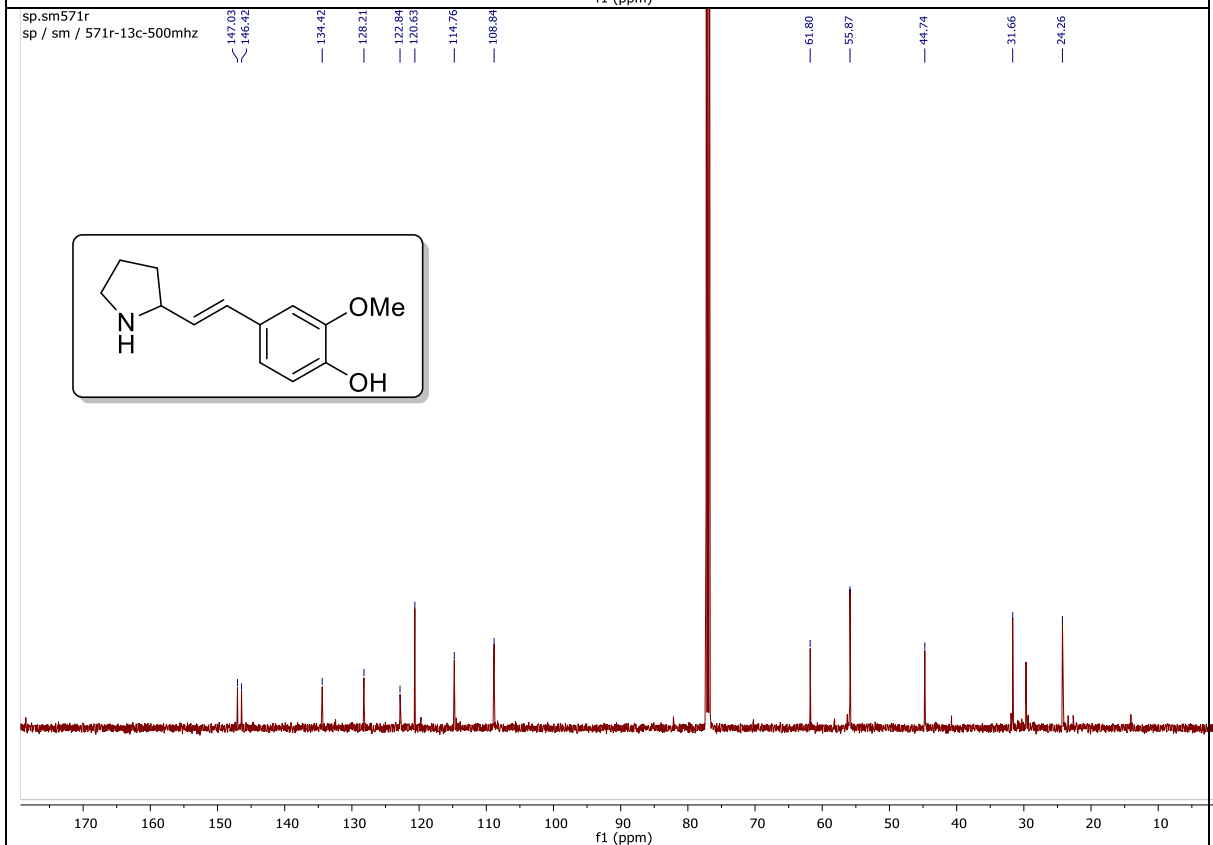

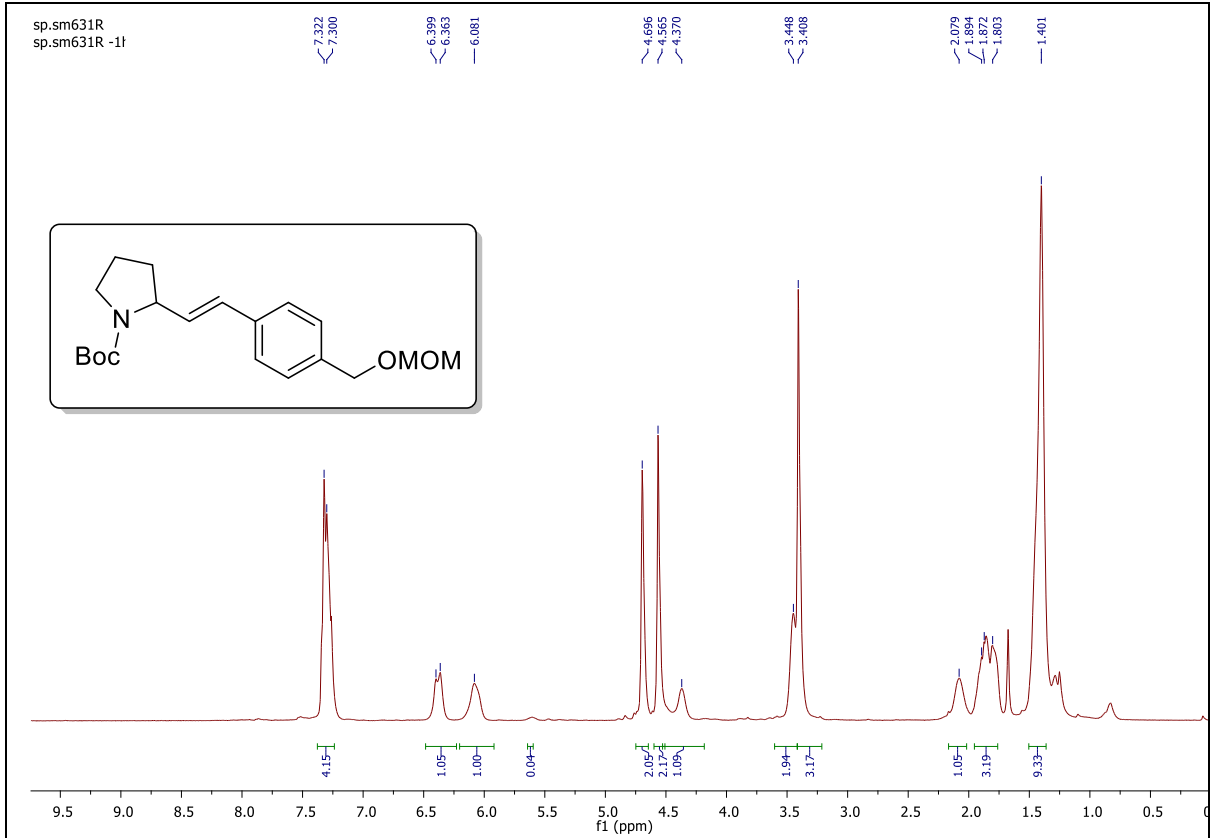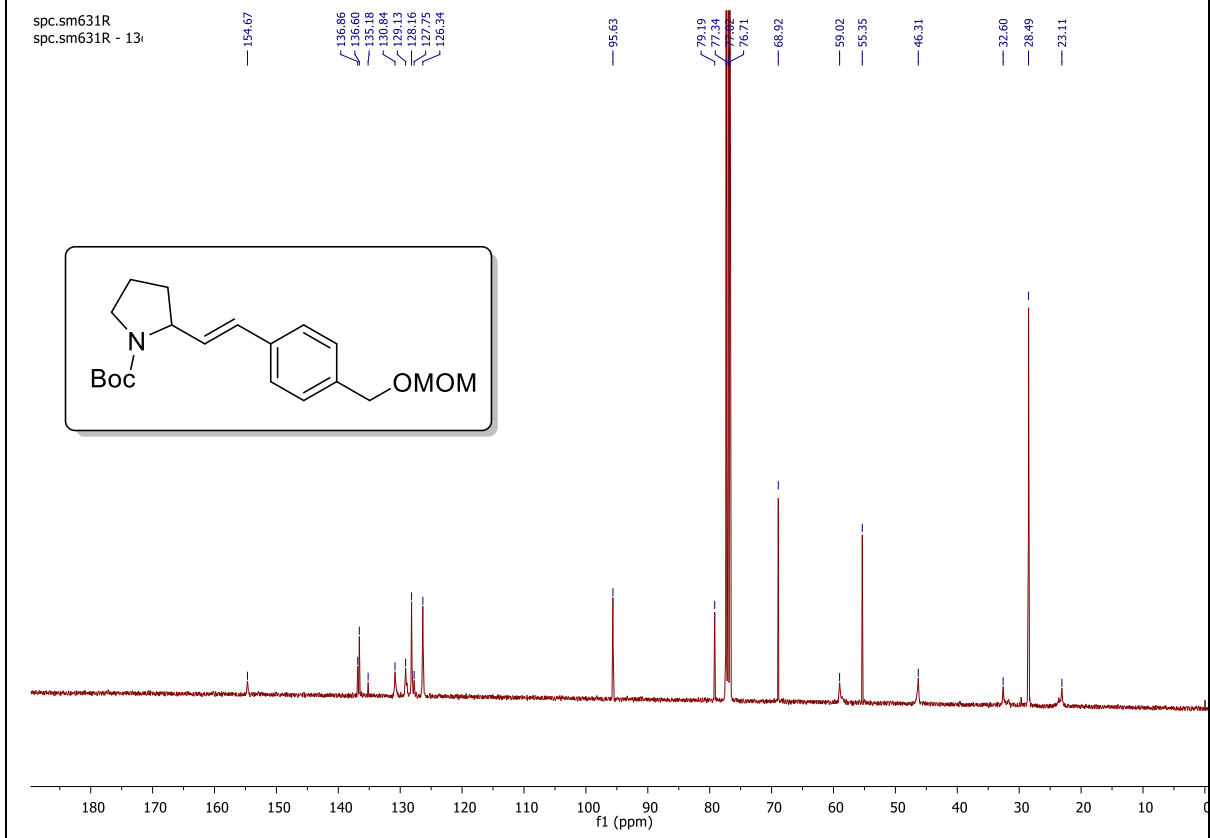

---
